# Supplementary material for: Convenient one-step synthesis of pyrrolo[3,4-c]quinolin-1-ones via TMSCl-catalyzed cascade reactions of isatins and β-enamino ketones
Source: Royal Society of Chemistry journal article supplement (doi:10.1039/c6ra15492a), 2016-01-01
Supplement: c6ra15492a1.pdf [file c6ra15492a1.pdf]

## Convenient one-step synthesis of pyrrolo[3,4-*c*]quinolin-1-ones via TMSCl-catalyzed cascade reactions of isatins and $\beta$ -enamino ketones

Hui Xu,<sup>a</sup> Pan Zhou,<sup>a</sup> Bei Zhou,<sup>b</sup> Jie Zhou,<sup>b</sup> Yuehai Shen,<sup>a</sup> Ling-Ling Lu<sup>a</sup> and Fu-Chao Yu<sup>\*a</sup>

<sup>a</sup> Faculty of Life Science and Technology, Kunming University of Science and Technology, Kunming, 650504, P. R. China.

<sup>b</sup> Key Laboratory of Medicinal Chemistry for Natural Resource (Yunnan University), Ministry of Education, School of Chemical Science and Technology, Yunnan University, Kunming, 650091, P. R. China

### Supporting Information

#### Content

|                                                                    |    |
|--------------------------------------------------------------------|----|
| 1. General Information.....                                        | 2  |
| 2. General Procedure.....                                          | 2  |
| 3. Characterization of products.....                               | 3  |
| 4. X-ray Structure and Data <sup>3</sup> of 6p (CCDC 1438897)..... | 15 |
| 5. NMR spectra ( <sup>1</sup> H NMR and <sup>13</sup> C NMR).....  | 18 |
| 6. References and Notes.....                                       | 91 |

## 1. General Information

All compounds were fully characterized by spectroscopic data. The NMR spectra were recorded on a Bruker Avance 400 ( $^1\text{H}$ : 400 MHz,  $^{13}\text{C}$ : 100 MHz) and Bruker DRX500 ( $^1\text{H}$ : 500 MHz,  $^{13}\text{C}$ : 125 MHz), chemical shifts ( $\delta$ ) are expressed in ppm, and  $J$  values are given in Hz, and deuterated  $\text{CDCl}_3$  and  $\text{DMSO-}d_6$  were used as solvent. IR spectra were recorded on a FT-IR Thermo Nicolet Avatar 360 using KBr pellet. The reactions were monitored by thin layer chromatography (TLC) using silica gel GF<sub>254</sub>. The melting points were determined on XT-4A melting point apparatus and are uncorrected. HRMs were performed on a Agilent LC/MS TOF instrument.

All chemicals and solvents were used as received without further purification unless otherwise stated. Column chromatography was performed on silica gel (200–300 mesh).

The material **4** was purchased from Aldrich Corporation Limited. Compounds **5** were prepared according to the literature.<sup>1</sup>

## 2. General Procedure

### 2.1 Synthesis of 3-methylene pyrrolo[3,4-*c*]quinolin-1-ones **6**.

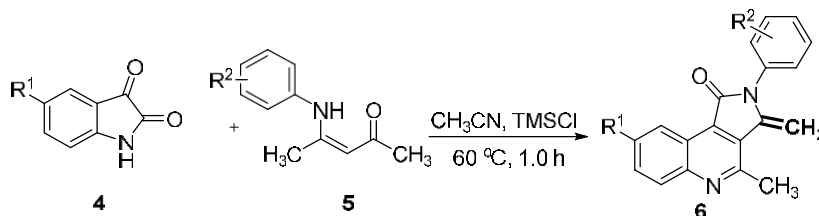

Isatins **4** (0.5 mmol) and  $\beta$ -enamino ketones **5** (0.5 mmol), acetonitrile (3.0 mL),  $\text{TMSCl}$  (2.0 mmol) were placed into a 10 mL round-bottom flask and the mixture was stirred at 60 °C for 1.0 h, and monitored by TLC until the  $\beta$ -enamino ketone substrate was used up. The mixture was cooled to room temperature, neutralized with a saturated solution of  $\text{Na}_2\text{CO}_3$  to pH 8–9, and then  $\text{EtOAc}$  (30 mL  $\times$  2) were added. The organic phase was washed with water (20 mL), dried over  $\text{Na}_2\text{SO}_4$ , concentrated and purified by flash column chromatography to afford quinoline derivative **6**.

### 2.2 Synthesis of pyrrolo[3,4-*c*]quinolin-1,3-diones **7**.<sup>2</sup>

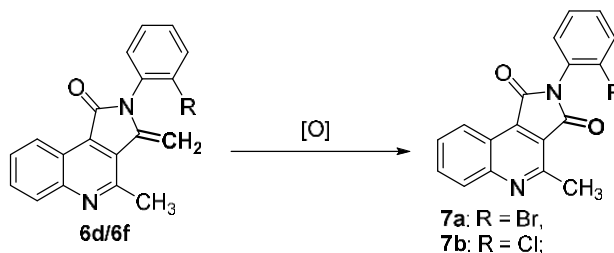

The 3-methylene pyrrolo[3,4-*c*]quinolin-1-one **6d/6f** (0.2 mmol) is then dissolved in acetone, and the  $\text{KMnO}_4/\text{Al}_2\text{O}_3$  powder (90 mg supported reagent, 0.3 mmol  $\text{KMnO}_4$ ) added room temperature. After five hours of vigorous stirring, the reaction mixture is filtered and the acetone filtrate condensed. The residue is taken up into  $\text{EtOAc}$ , washed with dilute hydrochloric acid, dried over  $\text{Na}_2\text{SO}_4$ , concentrated and purified by flash column chromatography to give the product **7a/7b**.

### 3. Characterization of products

#### 2-(4-methoxyphenyl)-4-methyl-3-methylene-2,3-dihydro-1H-pyrrolo[3,4-c]quinolin-1-one (6a).

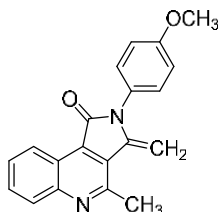

Yellow solid; mp 199–201 °C; IR (KBr): 1701, 1630, 1511, 1443, 1337, 1253, 1165, 1140, 1033, 844, 787, 750  $\text{cm}^{-1}$ ;  $^1\text{H}$  NMR (400 MHz,  $\text{CDCl}_3$ ):  $\delta$  = 3.00 (s, 3H, C–CH<sub>3</sub>), 3.87 (s, 3H, ArOCH<sub>3</sub>), 5.06 (d,  $J$  = 2.4 Hz, 1H, C=CH<sub>2</sub>), 5.54 (d,  $J$  = 2.0 Hz, 1H, C=CH<sub>2</sub>), 7.06 (d,  $J$  = 8.8 Hz, 2H, ArH), 7.31 (d,  $J$  = 8.8 Hz, 2H, ArH), 7.64–7.68 (m, 1H, ArH), 7.76–7.80 (m, 1H, ArH), 8.12 (d,  $J$  = 8.4 Hz, 1H, ArH), 9.01 (d,  $J$  = 8.4 Hz, 1H, ArH);  $^{13}\text{C}$  NMR (100 MHz,  $\text{CDCl}_3$ ):  $\delta$  = 25.2, 55.7, 97.9, 115.0, 115.0, 122.0, 124.5, 126.6, 127.6, 128.1, 128.8, 129.9, 129.9, 130.6, 131.3, 143.3, 148.2, 153.3, 159.7, 166.4; HRMS (TOF ES<sup>+</sup>):  $m/z$  calcd for  $\text{C}_{20}\text{H}_{17}\text{N}_2\text{O}_2$  [(M+H)<sup>+</sup>], 317.1285; found, 317.1282.

#### 4-methyl-3-methylene-2-(*p*-tolyl)-2,3-dihydro-1H-pyrrolo[3,4-c]quinolin-1-one (6b).

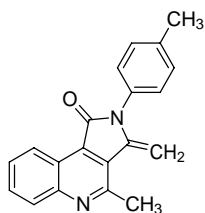

Yellow solid; mp 201–203 °C; IR (KBr): 1721, 1704, 1633, 1515, 1388, 1249, 1153, 1130, 1068, 873, 781, 704  $\text{cm}^{-1}$ ;  $^1\text{H}$  NMR (400 MHz,  $\text{DMSO}-d_6$ ):  $\delta$  = 2.41 (s, 3H, ArCH<sub>3</sub>), 2.91 (s, 3H, C–CH<sub>3</sub>), 4.97 (d,  $J$  = 2.4 Hz, 1H, C=CH<sub>2</sub>), 5.65 (d,  $J$  = 2.4 Hz, 1H, C=CH<sub>2</sub>), 7.32 (d,  $J$  = 8.4 Hz, 2H, ArH), 7.40 (d,  $J$  = 8.0 Hz, 2H, ArH), 7.70–7.74 (m, 1H, ArH), 7.82–7.86 (m, 1H, ArH), 8.08 (d,  $J$  = 8.8 Hz, 1H, ArH), 8.81 (d,  $J$  = 8.4 Hz, 1H, ArH);  $^{13}\text{C}$  NMR (100 MHz,  $\text{DMSO}-d_6$ ):  $\delta$  = 21.7, 25.6, 99.6, 122.0, 124.3, 128.1, 129.0, 129.5, 129.5, 129.6, 130.9, 130.9, 131.0, 131.5, 132.1, 139.1, 142.9, 148.3, 154.4, 166.1; HRMS (TOF ES<sup>+</sup>):  $m/z$  calcd for  $\text{C}_{20}\text{H}_{17}\text{N}_2\text{O}$  [(M+H)<sup>+</sup>], 301.1335; found, 301.1334.

#### 4-methyl-3-methylene-2-phenyl-2,3-dihydro-1H-pyrrolo[3,4-c]quinolin-1-one (6c).

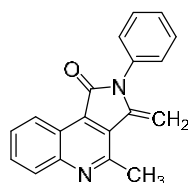

Yellow solid; mp 212–215 °C; IR (KBr): 1712, 1625, 1499, 1384, 1335, 1278, 1244, 1153, 839, 793, 770, 713  $\text{cm}^{-1}$ ;  $^1\text{H}$  NMR (500 MHz,  $\text{CDCl}_3$ ):  $\delta$  = 3.06 (s, 3H, C–CH<sub>3</sub>), 5.15 (d,  $J$  = 5.0 Hz, 1H, C=CH<sub>2</sub>), 5.62 (d,  $J$  = 5.0 Hz, 1H, C=CH<sub>2</sub>), 7.46 (d,  $J$  = 7.75 Hz, 2H, ArH), 7.51–7.54 (m, 1H, ArH), 7.60–7.63 (m, 2H, ArH), 7.70–7.74 (m, 1H, ArH), 7.82–7.86 (m, 1H, ArH), 8.17–8.19 (m, 1H, ArH), 9.06–9.08 (m, 1H, ArH);  $^{13}\text{C}$  NMR (125 MHz,  $\text{CDCl}_3$ ):  $\delta$  = 25.6, 98.3, 122.3, 124.8, 128.0, 128.5, 129.0, 129.1, 129.1, 129.1, 130.0, 130.0, 130.9, 131.5, 134.4, 143.2, 148.5, 156.3, 166.5; HRMS (TOF ES<sup>+</sup>):  $m/z$  calcd for  $\text{C}_{19}\text{H}_{15}\text{N}_2\text{O}$  [(M+H)<sup>+</sup>], 287.1179; found, 287.1178.

**2-(2-bromophenyl)-4-methyl-3-methylene-2,3-dihydro-1H-pyrrolo[3,4-c]quinolin-1-one (6d).**

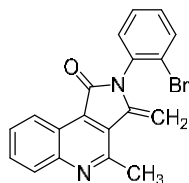

Yellow solid; mp 222–225 °C; IR (KBr): 1713, 1638, 1477, 1383, 1327, 1165, 1058, 1027, 859, 771  $\text{cm}^{-1}$ ;  $^1\text{H}$  NMR (500 MHz,  $\text{DMSO-}d_6$ ):  $\delta$  = 3.10 (s, 3H, C–CH<sub>3</sub>), 4.85 (d,  $J$  = 3.4 Hz, 1H, C=CH<sub>2</sub>), 5.82 (d,  $J$  = 3.3 Hz, 1H, C=CH<sub>2</sub>), 7.57–7.61 (m, 1H, ArH), 7.66–7.71 (m, 2H, ArH), 7.87–7.91 (m, 1H, ArH), 7.96–8.03 (m, 2H, ArH), 8.29 (d,  $J$  = 8.5 Hz, 1H, ArH), 8.94 (d,  $J$  = 8.0 Hz, 1H, ArH);  $^{13}\text{C}$  NMR (125 MHz,  $\text{DMSO-}d_6$ ):  $\delta$  = 24.2, 99.7, 121.6, 123.8, 123.9, 123.9, 127.9, 127.9, 129.2, 129.6, 131.8, 131.9, 132.3, 133.4, 133.9, 133.9, 140.9, 154.3, 164.7; HRMS (TOF ES<sup>+</sup>):  $m/z$  calcd for C<sub>19</sub>H<sub>14</sub>BrN<sub>2</sub>O [(M+H)<sup>+</sup>], 365.0290; found, 365.0293.

**2-(3-bromophenyl)-4-methyl-3-methylene-2,3-dihydro-1H-pyrrolo[3,4-c]quinolin-1-one (6e).**

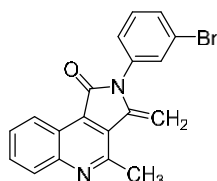

White solid; mp 211–213 °C; IR (KBr): 1706, 1634, 1477, 1334, 1278, 1148, 1126, 854, 773, 720, 680  $\text{cm}^{-1}$ ;  $^1\text{H}$  NMR (400 MHz,  $\text{CDCl}_3$ ):  $\delta$  = 3.02 (s, 3H, C–CH<sub>3</sub>), 5.13 (d,  $J$  = 2.4 Hz, 1H, C=CH<sub>2</sub>), 5.60 (d,  $J$  = 2.4 Hz, 1H, C=CH<sub>2</sub>), 7.37 (d,  $J$  = 7.6 Hz, 1H, ArH), 7.42–7.46 (m, 1H, ArH), 7.60–7.63 (m, 2H, ArH), 7.66–7.70 (m, 1H, ArH), 7.79–7.82 (m, 1H, ArH), 8.14 (d,  $J$  = 8.4 Hz, 1H, ArH), 8.99 (d,  $J$  = 8.4 Hz, 1H, ArH);  $^{13}\text{C}$  NMR (100 MHz,  $\text{CDCl}_3$ ):  $\delta$  = 25.3, 98.1, 121.9, 123.0, 124.4, 127.5, 127.6, 128.3, 128.9, 130.8, 130.9, 130.9, 131.9, 132.0, 135.4, 142.5, 148.3, 153.3, 166.0; HRMS (TOF ES<sup>+</sup>):  $m/z$  calcd for C<sub>19</sub>H<sub>14</sub>BrN<sub>2</sub>O [(M+H)<sup>+</sup>], 365.0284; found, 365.0281.

**2-(2-chlorophenyl)-4-methyl-3-methylene-2,3-dihydro-1H-pyrrolo[3,4-c]quinolin-1-one (6f).**

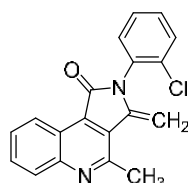

White solid; mp 217–219.5 °C; IR (KBr): 1713, 1638, 1595, 1482, 1385, 1250, 1170, 1059, 858, 771, 688  $\text{cm}^{-1}$ ;  $^1\text{H}$  NMR (500 MHz,  $\text{DMSO-}d_6$ ):  $\delta$  = 3.18 (s, 3H, C–CH<sub>3</sub>), 4.94 (d,  $J$  = 3.4 Hz, 1H, C=CH<sub>2</sub>), 5.86 (d,  $J$  = 3.4 Hz, 1H, C=CH<sub>2</sub>), 7.66–7.70 (m, 3H, ArH), 7.83–7.84 (m, 1H, ArH), 7.93–7.96 (m, 1H, ArH), 8.06–8.09 (m, 1H, ArH), 8.44 (d,  $J$  = 8.6 Hz, 1H, ArH), 8.96 (d,  $J$  = 8.2 Hz, 1H, ArH);  $^{13}\text{C}$  NMR (125 MHz,  $\text{DMSO-}d_6$ ):  $\delta$  = 23.1, 100.4, 121.7, 124.0, 126.2, 128.2, 129.1, 129.8, 130.8, 131.4, 131.9, 131.9, 132.2, 132.6, 133.1, 140.4, 144.3, 154.5, 164.3; HRMS (TOF ES<sup>+</sup>):  $m/z$  calcd for C<sub>19</sub>H<sub>14</sub>ClN<sub>2</sub>O [(M+H)<sup>+</sup>], 321.0795; found, 321.0797.

**2-(4-chlorophenyl)-4-methyl-3-methylene-2,3-dihydro-1H-pyrrolo[3,4-c]quinolin-1-one (6g).**

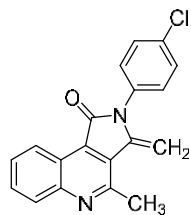

White solid; mp 236–238 °C; IR (KBr): 1708, 1634, 1494, 1390, 1253, 1087, 834, 769, 737, 684  $\text{cm}^{-1}$ ;  $^1\text{H}$  NMR (400 MHz,  $\text{CDCl}_3$ ):  $\delta$  = 3.00 (s, 3H, C– $\text{CH}_3$ ), 5.09 (d,  $J$  = 2.4 Hz, 1H, C= $\text{CH}_2$ ), 5.57 (d,  $J$  = 2.4 Hz, 1H, C= $\text{CH}_2$ ), 7.36 (d,  $J$  = 8.8 Hz, 2H, ArH), 7.53 (d,  $J$  = 8.4 Hz, 2H, ArH), 7.65–7.68 (m, 1H, ArH), 7.77–7.81 (m, 1H, ArH), 8.12 (d,  $J$  = 8.4 Hz, 1H, ArH), 8.98 (d,  $J$  = 8.4 Hz, 1H, ArH);  $^{13}\text{C}$  NMR (100 MHz,  $\text{CDCl}_3$ ):  $\delta$  = 25.2, 97.9, 121.9, 124.4, 127.6, 128.3, 128.9, 129.9, 129.9, 130.1, 130.1, 130.7, 131.0, 132.6, 134.6, 142.6, 148.2, 153.3, 166.0; HRMS (TOF  $\text{ES}^+$ ):  $m/z$  calcd for  $\text{C}_{19}\text{H}_{14}\text{ClN}_2\text{O}$  [( $\text{M}+\text{H}$ ) $^+$ ], 321.0789; found, 321.0789.

**2-(4-fluorophenyl)-4-methyl-3-methylene-2,3-dihydro-1H-pyrrolo[3,4-c]quinolin-1-one (6h).**

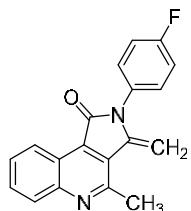

Pink solid; mp 189–191 °C; IR (KBr): 1698, 1633, 1509, 1385, 1224, 1150, 1097, 833, 773, 726  $\text{cm}^{-1}$ ;  $^1\text{H}$  NMR (400 MHz,  $\text{CDCl}_3$ ):  $\delta$  = 3.01 (s, 3H, C– $\text{CH}_3$ ), 5.06 (d,  $J$  = 2.8 Hz, 1H, C= $\text{CH}_2$ ), 5.57 (d,  $J$  = 2.4 Hz, 1H, C= $\text{CH}_2$ ), 7.23–7.27 (m, 2H, ArH), 7.37–7.41 (m, 2H, ArH), 7.65–7.69 (m, 1H, ArH), 7.77–7.82 (m, 1H, ArH), 8.13 (d,  $J$  = 8.4 Hz, 1H, ArH), 8.99 (d,  $J$  = 8.4 Hz, 1H, ArH);  $^{13}\text{C}$  NMR (100 MHz,  $\text{CDCl}_3$ ):  $\delta$  = 25.2, 97.9, 116.7 (d,  $J$  = 22.8 Hz), 116.7 (d,  $J$  = 22.8 Hz), 121.9, 124.4, 127.6, 128.3, 128.9, 130.0 (d,  $J$  = 3.2 Hz), 130.6 (d,  $J$  = 8.6 Hz), 130.6 (d,  $J$  = 8.6 Hz), 130.7, 131.1, 143.0, 148.3, 153.3, 162.5 (d,  $J$  = 247.1 Hz), 166.3; HRMS (TOF  $\text{ES}^+$ ):  $m/z$  calcd for  $\text{C}_{19}\text{H}_{14}\text{FN}_2\text{O}$  [( $\text{M}+\text{H}$ ) $^+$ ], 305.1085; found, 305.1082.

**2-(3-fluorophenyl)-4-methyl-3-methylene-2,3-dihydro-1H-pyrrolo[3,4-c]quinolin-1-one (6i).**

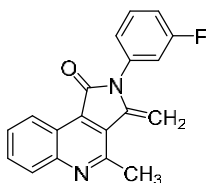

White solid; mp 233–235 °C; IR (KBr): 1706, 1626, 1590, 1497, 1450, 1224, 1145, 849, 808, 771, 748, 715, 687  $\text{cm}^{-1}$ ;  $^1\text{H}$  NMR (400 MHz,  $\text{CDCl}_3$ ):  $\delta$  = 3.08 (s, 3H, C– $\text{CH}_3$ ), 5.21 (d,  $J$  = 2.8 Hz, 1H, C= $\text{CH}_2$ ), 5.67 (d,  $J$  = 2.8 Hz, 1H, C= $\text{CH}_2$ ), 7.23–7.31 (m, 3H, ArH), 7.58–7.61 (m, 1H, ArH), 7.73–7.76 (m, 1H, ArH), 7.85–7.89 (m, 1H, ArH), 8.20 (d,  $J$  = 8.4 Hz, 1H, ArH), 9.06 (d,  $J$  = 8.4 Hz, 1H, ArH);  $^{13}\text{C}$  NMR (100 MHz,  $\text{CDCl}_3$ ):  $\delta$  = 25.2, 98.1, 115.8 (d,  $J$  = 20.8 Hz), 116.3 (d,  $J$  = 22.9 Hz), 121.9, 124.4, 124.6 (d,  $J$  = 3.3 Hz), 127.6, 128.3, 128.9, 130.7, 130.8 (d,  $J$  = 9.3 Hz), 130.9, 135.5 (d,  $J$  = 9.8 Hz), 142.5, 148.2, 153.3, 163.1 (d,  $J$  = 246.7 Hz), 165.9; HRMS (TOF  $\text{ES}^+$ ):  $m/z$  calcd for  $\text{C}_{19}\text{H}_{14}\text{FN}_2\text{O}$  [( $\text{M}+\text{H}$ ) $^+$ ], 305.1085; found, 305.1086.

**N-(4-(4-methyl-3-methylene-1-oxo-1H-pyrrolo[3,4-c]quinolin-2(3H)-yl)phenyl)acetamide (6j).**

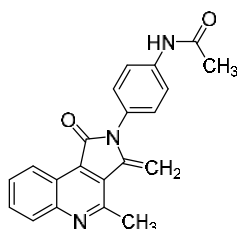

Pink solid; mp 302.5–304.5 °C; IR (KBr): 1703, 1668, 1532, 1517, 1391, 1313, 1154, 839, 772, 744, 671  $\text{cm}^{-1}$ ;  $^1\text{H}$  NMR (400 MHz,  $\text{DMSO-}d_6$ ):  $\delta$  = 2.10 (s, 3H, C–CH<sub>3</sub>), 2.91 (s, 3H, C–CH<sub>3</sub>), 4.98 (s, 1H, C=CH<sub>2</sub>), 5.64 (s, 1H, C=CH<sub>2</sub>), 7.36 (d,  $J$  = 8.0 Hz, 2H, ArH), 7.71–7.73 (m, 1H, ArH), 7.79 (d,  $J$  = 8.0 Hz, 2H, ArH), 7.82–7.84 (m, 1H, ArH), 8.06 (d,  $J$  = 8.0 Hz, 1H, ArH), 8.80 (d,  $J$  = 8.0 Hz, 1H, ArH), 10.20 (s, 1H, ArH);  $^{13}\text{C}$  NMR (100 MHz,  $\text{DMSO-}d_6$ ):  $\delta$  = 25.0, 25.6, 99.6, 120.6, 120.6, 122.0, 124.3, 128.1, 129.0, 129.2, 129.6, 130.1, 130.1, 131.0, 131.5, 140.4, 142.9, 148.3, 154.4, 166.2, 169.6; HRMS (TOF ES<sup>+</sup>):  $m/z$  calcd for C<sub>21</sub>H<sub>18</sub>N<sub>3</sub>O<sub>2</sub> [(M+H)<sup>+</sup>], 344.1394; found, 344.1399.

**8-bromo-2-(4-methoxyphenyl)-4-methyl-3-methylene-2,3-dihydro-1H-pyrrolo[3,4-c]quinolin-1-one (6k).**

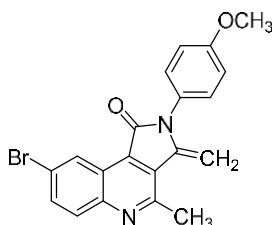

Yellow solid; mp 230–232.5 °C; IR (KBr): 1705, 1634, 1518, 1498, 1303, 1256, 1171, 1042, 987, 829, 726  $\text{cm}^{-1}$ ;  $^1\text{H}$  NMR (400 MHz,  $\text{CDCl}_3$ ):  $\delta$  = 2.98 (s, 3H, C–CH<sub>3</sub>), 3.88 (s, 3H, ArOCH<sub>3</sub>), 5.11 (d,  $J$  = 2.4 Hz, 1H, C=CH<sub>2</sub>), 5.58 (d,  $J$  = 2.4 Hz, 1H, C=CH<sub>2</sub>), 7.06 (d,  $J$  = 8.8 Hz, 2H, ArH), 7.29 (d,  $J$  = 8.8 Hz, 2H, ArH), 7.82–7.85 (m, 1H, ArH), 7.96 (d,  $J$  = 8.8 Hz, 1H, ArH), 9.16 (d,  $J$  = 2.0 Hz, 1H, ArH);  $^{13}\text{C}$  NMR (100 MHz,  $\text{CDCl}_3$ ):  $\delta$  = 25.2, 55.7, 98.7, 115.0, 115.0, 122.6, 123.0, 126.3, 126.8, 128.2, 129.9, 129.9, 130.3, 130.4, 134.1, 143.0, 146.7, 153.8, 159.8, 165.8; HRMS (TOF ES<sup>+</sup>):  $m/z$  calcd for C<sub>20</sub>H<sub>16</sub>BrN<sub>2</sub>O<sub>2</sub> [(M+H)<sup>+</sup>], 395.0390; found, 395.0393.

**8-bromo-4-methyl-3-methylene-2-(p-tolyl)-2,3-dihydro-1H-pyrrolo[3,4-c]quinolin-1-one (6l).**

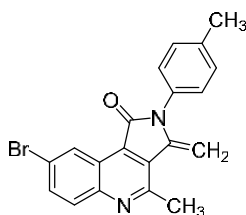

White solid; mp 231–233.5 °C; IR (KBr): 1704, 1631, 1514, 1375, 1333, 1264, 1170, 1061, 874, 814, 796, 656  $\text{cm}^{-1}$ ;  $^1\text{H}$  NMR (400 MHz,  $\text{CDCl}_3$ ):  $\delta$  = 2.45 (s, 3H, ArCH<sub>3</sub>), 2.98 (s, 3H, C–CH<sub>3</sub>), 5.14 (d,  $J$  = 2.4 Hz, 1H, C=CH<sub>2</sub>), 5.58 (d,  $J$  = 2.4 Hz, 1H, C=CH<sub>2</sub>), 7.27 (d,  $J$  = 8.0 Hz, 2H, ArH), 7.36 (d,  $J$  = 8.0 Hz, 2H, ArH), 7.82–7.85 (m, 1H, ArH), 7.97 (d,  $J$  = 8.8 Hz, 1H, ArH), 9.17 (d,  $J$  = 2.4 Hz, 1H, ArH);  $^{13}\text{C}$  NMR (100 MHz,  $\text{CDCl}_3$ ):  $\delta$  = 21.4, 25.2, 98.7, 122.6, 123.0, 126.8, 128.2, 128.4, 128.4, 130.3, 130.3, 130.3, 130.4, 131.2, 134.1, 138.8, 142.8, 146.7, 153.8, 165.7; HRMS (TOF ES<sup>+</sup>):  $m/z$  calcd for C<sub>20</sub>H<sub>16</sub>BrN<sub>2</sub>O [(M+H)<sup>+</sup>], 379.0441; found, 379.0440.

**8-bromo-4-methyl-3-methylene-2-phenyl-2,3-dihydro-1H-pyrrolo[3,4-c]quinolin-1-one (6m).**

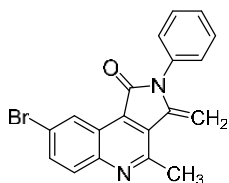

White solid; mp 235–237.5 °C; IR (KBr): 1721, 1634, 1497, 1384, 1335, 1185, 1067, 988, 785, 719  $\text{cm}^{-1}$ ;  $^1\text{H}$  NMR (400 MHz,  $\text{CDCl}_3$ ):  $\delta$  = 2.99 (s, 3H, C– $\text{CH}_3$ ), 5.15 (d,  $J$  = 2.8 Hz, 1H, C= $\text{CH}_2$ ), 5.60 (d,  $J$  = 2.8 Hz, 1H, C= $\text{CH}_2$ ), 7.39–7.41 (m, 2H, ArH), 7.46–7.50 (m, 1H, ArH), 7.55–7.58 (m, 2H, ArH), 7.83–7.86 (m, 1H, ArH), 7.97 (d,  $J$  = 8.8 Hz, 1H, ArH), 9.16 (d,  $J$  = 2.0 Hz, 1H, ArH);  $^{13}\text{C}$  NMR (100 MHz,  $\text{CDCl}_3$ ):  $\delta$  = 25.2, 98.8, 122.6, 122.9, 126.7, 128.2, 128.7, 128.7, 128.8, 129.7, 129.7, 130.2, 130.4, 133.9, 134.1, 142.6, 146.7, 153.8, 165.6; HRMS (TOF  $\text{ES}^+$ ):  $m/z$  calcd for  $\text{C}_{19}\text{H}_{14}\text{BrN}_2\text{O}$  [( $\text{M}+\text{H}$ ) $^+$ ], 365.0284; found, 365.0283.

**8-bromo-2-(3-bromophenyl)-4-methyl-3-methylene-2,3-dihydro-1H-pyrrolo[3,4-c]quinolin-1-one (6n).**

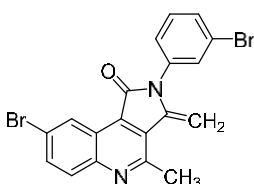

White solid; mp 223.5–225.5 °C; IR (KBr): 1707, 1631, 1586, 1476, 1441, 1371, 1333, 1171, 886, 865, 682  $\text{cm}^{-1}$ ;  $^1\text{H}$  NMR (400 MHz,  $\text{CDCl}_3$ ):  $\delta$  = 2.99 (s, 3H, C– $\text{CH}_3$ ), 5.17 (d,  $J$  = 2.8 Hz, 1H, C= $\text{CH}_2$ ), 5.64 (d,  $J$  = 2.8 Hz, 1H, C= $\text{CH}_2$ ), 7.37 (d,  $J$  = 8.0 Hz, 1H, ArH), 7.42–7.46 (m, 1H, ArH), 7.59–7.63 (m, 2H, ArH), 7.84–7.87 (m, 1H, ArH), 7.98 (d,  $J$  = 9.2 Hz, 1H, ArH), 9.14 (d,  $J$  = 2.0 Hz, 1H, ArH);  $^{13}\text{C}$  NMR (100 MHz,  $\text{CDCl}_3$ ):  $\delta$  = 25.3, 98.9, 122.8, 122.9, 123.0, 126.7, 127.4, 128.2, 129.9, 130.5, 130.9, 131.9, 132.0, 134.3, 135.2, 142.2, 146.8, 153.8, 165.4; HRMS (TOF  $\text{ES}^+$ ):  $m/z$  calcd for  $\text{C}_{19}\text{H}_{13}\text{Br}_2\text{N}_2\text{O}$  [( $\text{M}+\text{H}$ ) $^+$ ], 442.9389; found, 442.9387.

**8-bromo-2-(4-chlorophenyl)-4-methyl-3-methylene-2,3-dihydro-1H-pyrrolo[3,4-c]quinolin-1-one (6o).**

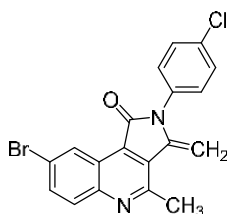

White solid; mp 244–246 °C; IR (KBr): 1704, 1634, 1496, 1378, 1333, 1174, 1089, 1016, 863, 830, 774, 736  $\text{cm}^{-1}$ ;  $^1\text{H}$  NMR (400 MHz,  $\text{CDCl}_3$ ):  $\delta$  = 2.99 (s, 3H, C– $\text{CH}_3$ ), 5.14 (d,  $J$  = 2.8 Hz, 1H, C= $\text{CH}_2$ ), 5.62 (d,  $J$  = 2.8 Hz, 1H, C= $\text{CH}_2$ ), 7.35 (d,  $J$  = 8.8 Hz, 2H, ArH), 7.55 (d,  $J$  = 8.8 Hz, 2H, ArH), 7.84–7.87 (m, 1H, ArH), 7.97 (d,  $J$  = 9.2 Hz, 1H, ArH), 9.13 (d,  $J$  = 2.0 Hz, 1H, ArH);  $^{13}\text{C}$  NMR (100 MHz,  $\text{CDCl}_3$ ):  $\delta$  = 25.3, 98.7, 122.8, 122.9, 126.7, 128.3, 130.0, 130.0, 130.0, 130.0, 130.0, 130.5, 132.4, 134.3, 134.7, 142.4, 146.7, 153.8, 165.5; HRMS (TOF  $\text{ES}^+$ ):  $m/z$  calcd for  $\text{C}_{19}\text{H}_{13}\text{BrClN}_2\text{O}$  [( $\text{M}+\text{H}$ ) $^+$ ], 398.9894; found, 398.9890.

**8-bromo-2-(4-fluorophenyl)-4-methyl-3-methylene-2,3-dihydro-1H-pyrrolo[3,4-c]quinolin-1-one (6p).**

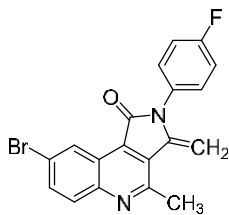

Pink solid; mp 230.5–233 °C; IR (KBr): 1702, 1633, 1512, 1393, 1222, 1182, 1160, 1061, 865, 831, 733, 699  $\text{cm}^{-1}$ ;  $^1\text{H}$  NMR (400 MHz,  $\text{CDCl}_3$ ):  $\delta$  = 2.97 (s, 3H, C–CH<sub>3</sub>), 5.10 (s, 1H, C=CH<sub>2</sub>), 5.60 (s, 1H, C=CH<sub>2</sub>), 7.23–7.27 (m, 2H, ArH), 7.36–7.40 (m, 2H, ArH), 7.84 (d,  $J$  = 9.2 Hz, 1H, ArH), 7.95 (d,  $J$  = 9.2 Hz, 1H, ArH), 9.11 (s, 1H, ArH);  $^{13}\text{C}$  NMR (100 MHz,  $\text{CDCl}_3$ ):  $\delta$  = 25.2, 98.6, 116.8 (d,  $J$  = 22.7 Hz), 116.8 (d,  $J$  = 22.7 Hz), 122.7, 122.8, 126.6, 128.2, 129.7, 130.0, 130.5 (d,  $J$  = 12.3 Hz), 130.5 (d,  $J$  = 12.3 Hz), 130.5, 134.2, 142.6, 146.7, 153.8, 162.5 (d,  $J$  = 247.2 Hz), 165.7; HRMS (TOF ES<sup>+</sup>):  $m/z$  calcd for  $\text{C}_{19}\text{H}_{13}\text{BrFN}_2\text{O}$  [(M+H)<sup>+</sup>], 383.0190; found, 383.0194.

**8-bromo-2-(3-fluorophenyl)-4-methyl-3-methylene-2,3-dihydro-1H-pyrrolo[3,4-c]quinolin-1-one (6q).**

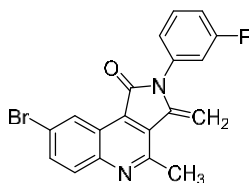

White solid; mp 226.5–230 °C; IR (KBr): 1702, 1629, 1496, 1393, 1334, 1218, 1146, 890, 857, 827, 673  $\text{cm}^{-1}$ ;  $^1\text{H}$  NMR (400 MHz,  $\text{CDCl}_3$ ):  $\delta$  = 2.99 (s, 3H, C–CH<sub>3</sub>), 5.19 (d,  $J$  = 2.8 Hz, 1H, C=CH<sub>2</sub>), 5.64 (d,  $J$  = 2.8 Hz, 1H, C=CH<sub>2</sub>), 7.14–7.23 (m, 3H, ArH), 7.51–7.57 (m, 1H, ArH), 7.84–7.87 (m, 1H, ArH), 7.97 (d,  $J$  = 8.8 Hz, 1H, ArH), 9.14 (d,  $J$  = 2.0 Hz, 1H, ArH);  $^{13}\text{C}$  NMR (100 MHz,  $\text{CDCl}_3$ ):  $\delta$  = 25.3, 98.9, 115.9 (d,  $J$  = 20.9 Hz), 116.2 (d,  $J$  = 22.9 Hz), 122.8, 122.9, 124.5 (d,  $J$  = 3.4 Hz), 126.7, 128.2, 130.0, 130.5, 130.9 (d,  $J$  = 8.7 Hz), 134.3, 135.3 (d,  $J$  = 9.8 Hz), 142.2, 146.7, 153.8, 163.1 (d,  $J$  = 247.0 Hz), 165.4; HRMS (TOF ES<sup>+</sup>):  $m/z$  calcd for  $\text{C}_{19}\text{H}_{13}\text{BrFN}_2\text{O}$  [(M+H)<sup>+</sup>], 383.0190; found, 383.0192.

**8-chloro-4-methyl-3-methylene-2-(*p*-tolyl)-2,3-dihydro-1H-pyrrolo[3,4-c]quinolin-1-one (6r).**

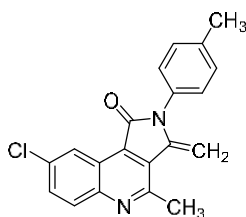

White solid; mp 223–225 °C; IR (KBr): 1702, 1626, 1499, 1402, 1340, 1169, 1071, 873, 796, 742  $\text{cm}^{-1}$ ;  $^1\text{H}$  NMR (400 MHz,  $\text{CDCl}_3$ ):  $\delta$  = 2.50 (s, 3H, ArCH<sub>3</sub>), 3.04 (s, 3H, C–CH<sub>3</sub>), 5.19 (d,  $J$  = 2.4 Hz, 1H, C=CH<sub>2</sub>), 5.63 (d,  $J$  = 2.4 Hz, 1H, C=CH<sub>2</sub>), 7.32 (d,  $J$  = 8.0 Hz, 2H, ArH), 7.41 (d,  $J$  = 8.0 Hz, 2H, ArH), 7.74–7.76 (m, 1H, ArH), 8.08 (d,  $J$  = 9.2 Hz, 1H, ArH), 9.03 (d,  $J$  = 2.4 Hz, 1H, ArH);  $^{13}\text{C}$  NMR (100 MHz,  $\text{CDCl}_3$ ):  $\delta$  = 21.3, 25.1, 98.6, 122.4, 123.3, 128.1, 128.3, 128.3, 130.2, 130.2, 130.2, 130.3, 131.0, 131.4, 134.1, 138.7, 142.6, 146.3, 153.5, 165.6; HRMS (TOF ES<sup>+</sup>):  $m/z$  calcd for  $\text{C}_{20}\text{H}_{16}\text{ClN}_2\text{O}$  [(M+H)<sup>+</sup>], 335.0946; found, 335.0946.

**8-chloro-4-methyl-3-methylene-2-phenyl-2,3-dihydro-1H-pyrrolo[3,4-c]quinolin-1-one (6s).**



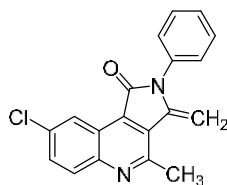

Red solid; mp 231–233 °C; IR (KBr): 1702, 1629, 1496, 1388, 1331, 1184, 1071, 897, 873, 720, 695  $\text{cm}^{-1}$ ;  $^1\text{H}$  NMR (400 MHz,  $\text{CDCl}_3$ ):  $\delta$  = 3.00 (s, 3H, C– $\text{CH}_3$ ), 5.15 (d,  $J$  = 2.4 Hz, 1H, C= $\text{CH}_2$ ), 5.60 (d,  $J$  = 2.4 Hz, 1H, C= $\text{CH}_2$ ), 7.40 (d,  $J$  = 7.6 Hz, 2H, ArH), 7.46–7.50 (m, 1H, ArH), 7.55 (d,  $J$  = 7.6 Hz, 2H, ArH), 7.69–7.72 (m, 1H, ArH), 8.04 (d,  $J$  = 9.2 Hz, 1H, ArH), 8.98 (d,  $J$  = 2.4 Hz, 1H, ArH);  $^{13}\text{C}$  NMR (100 MHz,  $\text{CDCl}_3$ ):  $\delta$  = 25.1, 98.7, 122.4, 123.3, 128.2, 128.6, 128.6, 128.7, 129.6, 129.6, 130.2, 131.4, 133.8, 134.2, 142.5, 146.3, 153.5, 165.5; HRMS (TOF  $\text{ES}^+$ ):  $m/z$  calcd for  $\text{C}_{19}\text{H}_{14}\text{ClN}_2\text{O}$  [( $\text{M}+\text{H}$ ) $^+$ ], 321.0789; found, 321.0788.

**2-(3-bromophenyl)-8-chloro-4-methyl-3-methylene-2,3-dihydro-1H-pyrrolo[3,4-c]quinolin-1-one (6t).**

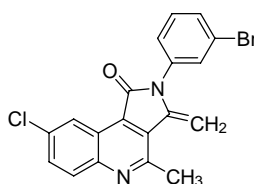

White solid; mp 193.5–195 °C; IR (KBr): 1704, 1630, 1475, 1369, 1334, 1171, 1075, 865, 782, 748, 684  $\text{cm}^{-1}$ ;  $^1\text{H}$  NMR (400 MHz,  $\text{CDCl}_3$ ):  $\delta$  = 2.97 (s, 3H, C– $\text{CH}_3$ ), 5.16 (d,  $J$  = 2.4 Hz, 1H, C= $\text{CH}_2$ ), 5.62 (d,  $J$  = 2.4 Hz, 1H, C= $\text{CH}_2$ ), 7.36 (d,  $J$  = 8.0 Hz, 1H, ArH), 7.42 (d,  $J$  = 8.0 Hz, 1H, ArH), 7.59–7.62 (m, 2H, ArH), 7.68–7.71 (m, 1H, ArH), 8.01 (d,  $J$  = 8.8 Hz, 1H, ArH), 8.91 (d,  $J$  = 2.0 Hz, 1H, ArH);  $^{13}\text{C}$  NMR (100 MHz,  $\text{CDCl}_3$ ):  $\delta$  = 25.1, 98.8, 122.2, 122.9, 123.1, 127.3, 128.1, 129.9, 130.3, 130.8, 131.5, 131.7, 131.8, 134.3, 135.0, 142.1, 146.3, 153.5, 165.3; HRMS (TOF  $\text{ES}^+$ ):  $m/z$  calcd for  $\text{C}_{19}\text{H}_{13}\text{BrClN}_2\text{O}$  [( $\text{M}+\text{H}$ ) $^+$ ], 398.9900; found, 398.9904.

**8-chloro-2-(3-fluorophenyl)-4-methyl-3-methylene-2,3-dihydro-1H-pyrrolo[3,4-c]quinolin-1-one (6u).**

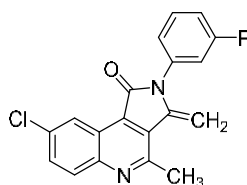

Yellow solid; mp 238–240 °C; IR (KBr): 1702, 1630, 1593, 1387, 1333, 1160, 1021, 883, 831, 692  $\text{cm}^{-1}$ ;  $^1\text{H}$  NMR (500 MHz,  $\text{CDCl}_3$ ):  $\delta$  = 3.06 (s, 3H, C– $\text{CH}_3$ ), 5.25 (d,  $J$  = 2.8 Hz, 1H, C= $\text{CH}_2$ ), 5.70 (d,  $J$  = 2.8 Hz, 1H, C= $\text{CH}_2$ ), 7.21–7.32 (m, 3H, ArH), 7.57–7.62 (m, 1H, ArH), 7.77–7.79 (m, 1H, ArH), 8.11 (d,  $J$  = 8.95 Hz, 1H, ArH), 9.02 (d,  $J$  = 2.15 Hz, 1H, ArH);  $^{13}\text{C}$  NMR (125 MHz,  $\text{CDCl}_3$ ):  $\delta$  = 25.5, 99.0, 116.2 (d,  $J$  = 20.8 Hz), 116.5 (d,  $J$  = 23.0 Hz), 122.7, 123.6, 123.6, 124.8, 128.6, 130.4, 130.6, 131.1 (d,  $J$  = 8.9 Hz), 132.0, 134.8, 135.6 (d,  $J$  = 5.8 Hz), 142.5, 146.8, 153.9, 163.4 (d,  $J$  = 250.6 Hz), 165.7; HRMS (TOF  $\text{ES}^+$ ):  $m/z$  calcd for  $\text{C}_{19}\text{H}_{13}\text{ClFN}_2\text{O}$  [( $\text{M}+\text{H}$ ) $^+$ ], 339.0695; found, 339.0695.

**8-fluoro-2-(4-methoxyphenyl)-4-methyl-3-methylene-2,3-dihydro-1H-pyrrolo[3,4-c]quinolin-1-one (6v).**

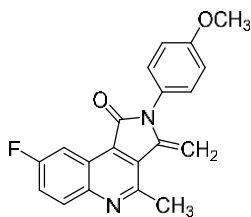

Yellow solid; mp 200–202 °C; IR (KBr): 1703, 1634, 1515, 1387, 1252, 1193, 1036, 873, 867, 810, 786, 662  $\text{cm}^{-1}$ ;  $^1\text{H}$  NMR (500 MHz,  $\text{CDCl}_3$ ):  $\delta$  = 3.05 (s, 3H, C–CH<sub>3</sub>), 3.94 (s, 3H, ArOCH<sub>3</sub>), 5.16 (d,  $J$  = 2.4 Hz, 1H, C=CH<sub>2</sub>), 5.64 (d,  $J$  = 2.3 Hz, 1H, C=CH<sub>2</sub>), 7.12 (d,  $J$  = 8.75 Hz, 2H, ArH), 7.36 (d,  $J$  = 8.75 Hz, 2H, ArH), 7.58–7.62 (m, 1H, ArH), 8.16–8.19 (m, 1H, ArH), 8.67–8.69 (m, 1H, ArH);  $^{13}\text{C}$  NMR (125 MHz,  $\text{CDCl}_3$ ):  $\delta$  = 25.3, 56.0, 98.8, 108.5 (d,  $J$  = 23.8 Hz), 115.3, 115.3, 121.0 (d,  $J$  = 26.3 Hz), 123.0 (d,  $J$  = 11.3 Hz), 126.7, 128.5, 130.2, 130.2, 131.2 (d,  $J$  = 6.3 Hz), 131.5 (d,  $J$  = 10 Hz), 143.4, 145.6, 152.8, 160.1, 161.5 (d,  $J$  = 250.0 Hz), 166.4; HRMS (TOF ES<sup>+</sup>):  $m/z$  calcd for  $\text{C}_{20}\text{H}_{16}\text{FN}_2\text{O}_2$  [(M+H)<sup>+</sup>], 335.1190; found, 335.1194.

**8-fluoro-4-methyl-3-methylene-2-(*p*-tolyl)-2,3-dihydro-1*H*-pyrrolo[3,4-*c*]quinolin-1-one (6w).**

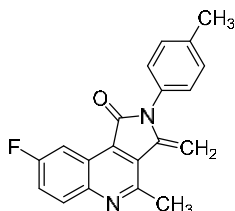

Yellow solid; mp 165.5–167 °C; IR (KBr): 1717, 1634, 1514, 1374, 1341, 1243, 1210, 1093, 873, 804, 784, 753  $\text{cm}^{-1}$ ;  $^1\text{H}$  NMR (400 MHz,  $\text{CDCl}_3$ ):  $\delta$  = 2.45 (s, 3H, ArCH<sub>3</sub>), 3.00 (s, 3H, C–CH<sub>3</sub>), 5.13 (d,  $J$  = 2.8 Hz, 1H, C=CH<sub>2</sub>), 5.59 (d,  $J$  = 2.4 Hz, 1H, C=CH<sub>2</sub>), 7.28 (d,  $J$  = 8.4 Hz, 2H, ArH), 7.36 (d,  $J$  = 8.0 Hz, 2H, ArH), 7.52–7.57 (m, 1H, ArH), 8.10–8.14 (m, 1H, ArH), 8.62–8.65 (m, 1H, ArH);  $^{13}\text{C}$  NMR (100 MHz,  $\text{CDCl}_3$ ):  $\delta$  = 21.4, 25.1, 98.6, 108.2 (d,  $J$  = 23.7 Hz), 120.7 (d,  $J$  = 25.9 Hz), 122.7 (d,  $J$  = 11.6 Hz), 128.2, 128.5, 128.5, 130.4, 130.4, 130.9 (d,  $J$  = 5.8 Hz), 131.2, 131.3, 133.8, 142.9, 145.3, 152.6 (d,  $J$  = 2.9 Hz), 161.6 (d,  $J$  = 248.5 Hz), 165.9; HRMS (TOF ES<sup>+</sup>):  $m/z$  calcd for  $\text{C}_{20}\text{H}_{16}\text{FN}_2\text{O}$  [(M+H)<sup>+</sup>], 319.1241; found, 319.1245.

**8-fluoro-4-methyl-3-methylene-2-phenyl-2,3-dihydro-1*H*-pyrrolo[3,4-*c*]quinolin-1-one (6x).**

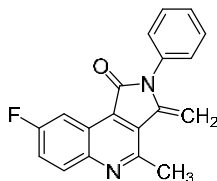

White solid; mp 204.5–206 °C; IR (KBr): 1702, 1633, 1602, 1512, 1373, 1341, 1270, 1211, 1095, 870, 840, 692  $\text{cm}^{-1}$ ;  $^1\text{H}$  NMR (400 MHz,  $\text{CDCl}_3$ ):  $\delta$  = 3.00 (s, 3H, C–CH<sub>3</sub>), 5.14 (d,  $J$  = 2.8 Hz, 1H, C=CH<sub>2</sub>), 5.60 (d,  $J$  = 2.4 Hz, 1H, C=CH<sub>2</sub>), 7.39–7.41 (m, 2H, ArH), 7.48–7.50 (m, 1H, ArH), 7.52–7.58 (m, 3H, ArH), 8.10–8.13 (m, 1H, ArH), 8.61–8.64 (m, 1H, ArH);  $^{13}\text{C}$  NMR (100 MHz,  $\text{CDCl}_3$ ):  $\delta$  = 25.1, 98.6, 108.2 (d,  $J$  = 23.7 Hz), 120.8 (d,  $J$  = 25.9 Hz), 122.7 (d,  $J$  = 11.6 Hz), 128.3, 128.7, 128.7, 128.8, 129.7, 129.7, 130.9 (d,  $J$  = 6.0 Hz), 131.3 (d,  $J$  = 9.4 Hz), 133.9, 142.7, 145.3, 152.6 (d,  $J$  = 2.9 Hz), 161.7 (d,  $J$  = 248.6 Hz), 165.8; HRMS (TOF ES<sup>+</sup>):  $m/z$  calcd for  $\text{C}_{19}\text{H}_{14}\text{FN}_2\text{O}$  [(M+H)<sup>+</sup>], 305.1085; found, 305.1089.

**2-(3-bromophenyl)-8-fluoro-4-methyl-3-methylene-2,3-dihydro-1*H*-pyrrolo[3,4-*c*]quinolin-1-one (6y).**

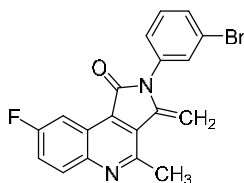

White solid; mp 197–199 °C; IR (KBr): 1705, 1635, 1514, 1478, 1375, 1340, 1241, 1194, 870, 798, 772, 679  $\text{cm}^{-1}$ ;  $^1\text{H}$  NMR (400 MHz,  $\text{CDCl}_3$ ):  $\delta$  = 2.99 (s, 3H, C–CH<sub>3</sub>), 5.16 (d,  $J$  = 1.6 Hz, 1H, C=CH<sub>2</sub>), 5.63 (s, 1H, C=CH<sub>2</sub>), 7.26–7.36 (m, 1H, ArH), 7.42–7.46 (m, 1H, ArH), 7.53–7.63 (m, 3H, ArH), 8.10–8.13 (m, 1H, ArH), 8.56–8.60 (m, 1H, ArH);  $^{13}\text{C}$  NMR (100 MHz,  $\text{CDCl}_3$ ):  $\delta$  = 25.1, 98.8, 108.1 (d,  $J$  = 23.8 Hz), 120.9 (d,  $J$  = 25.9 Hz), 122.6 (d,  $J$  = 11.7 Hz), 123.0, 127.5, 128.2, 130.5, 130.9, 131.4 (d,  $J$  = 9.4 Hz), 131.9, 131.9, 135.2, 142.3, 145.3, 152.5 (d,  $J$  = 2.9 Hz), 161.7 (d,  $J$  = 249 Hz), 165.6; HRMS (TOF ES<sup>+</sup>):  $m/z$  calcd for  $\text{C}_{19}\text{H}_{13}\text{BrFN}_2\text{O}$  [(M+H)<sup>+</sup>], 383.0190; found, 383.0187.

**8-fluoro-2-(3-fluorophenyl)-4-methyl-3-methylene-2,3-dihydro-1H-pyrrolo[3,4-c]quinolin-1-one (6z).**

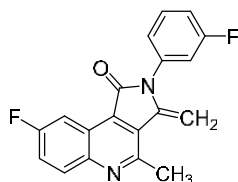

White solid; mp 221–223 °C; IR (KBr): 1700, 1633, 1596, 1514, 1494, 1376, 1344, 1223, 865, 775, 681  $\text{cm}^{-1}$ ;  $^1\text{H}$  NMR (400 MHz,  $\text{CDCl}_3$ ):  $\delta$  = 3.00 (s, 3H, C–CH<sub>3</sub>), 5.18 (d,  $J$  = 2.4 Hz, 1H, C=CH<sub>2</sub>), 5.63 (d,  $J$  = 2.4 Hz, 1H, C=CH<sub>2</sub>), 7.15–7.26 (m, 3H, ArH), 7.53–7.57 (m, 2H, ArH), 8.10–8.13 (m, 1H, ArH), 8.57–8.60 (m, 1H, ArH);  $^{13}\text{C}$  NMR (100 MHz,  $\text{CDCl}_3$ ):  $\delta$  = 25.1, 98.7, 108.1 (d,  $J$  = 23.7 Hz), 115.9 (d,  $J$  = 20.8 Hz), 116.3 (d,  $J$  = 23.0 Hz), 120.9 (d,  $J$  = 26.0 Hz), 122.6 (d,  $J$  = 11.7 Hz), 124.5 (d,  $J$  = 3.3 Hz), 128.2, 130.6 (d,  $J$  = 6.1 Hz), 130.9 (d,  $J$  = 9.0 Hz), 131.4 (d,  $J$  = 9.2 Hz), 135.3 (d,  $J$  = 9.9 Hz), 142.3, 145.3, 152.5 (d,  $J$  = 2.8 Hz), 161.7 (d,  $J$  = 248.7 Hz), 163.1 (d,  $J$  = 247.0 Hz), 165.3; HRMS (TOF ES<sup>+</sup>):  $m/z$  calcd for  $\text{C}_{19}\text{H}_{13}\text{F}_2\text{N}_2\text{O}$  [(M+H)<sup>+</sup>], 323.0990; found, 323.0996.

**2-butyl-6-fluoro-4-methyl-3-methylene-2,3-dihydro-1H-pyrrolo[3,4-c]quinolin-1-one (6a')**

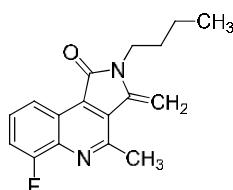

White solid; mp 90–92 °C; IR (KBr): 1699, 1510, 1469, 1227, 1089, 831, 758, 631  $\text{cm}^{-1}$ ;  $^1\text{H}$  NMR (500 MHz,  $\text{CDCl}_3$ ):  $\delta$  = 0.98–1.01 (m, 3H, CH<sub>3</sub>), 1.41–1.48 (m, 2H, CH<sub>2</sub>), 1.68–1.75 (m, 2H, CH<sub>2</sub>), 3.03 (s, 3H, CH<sub>3</sub>), 3.86–3.89 (m, 2H, CH<sub>2</sub>), 5.28 (d,  $J$  = 2.8 Hz, 1H, C=CH<sub>2</sub>), 5.62 (d,  $J$  = 2.8 Hz, 1H, C=CH<sub>2</sub>), 7.44–7.48 (m, 1H, ArH), 7.57–7.61 (m, 1H, ArH), 8.78 (d,  $J$  = 8.5 Hz, 1H, ArH);  $^{13}\text{C}$  NMR (125 MHz,  $\text{CDCl}_3$ ):  $\delta$  = 14.1, 20.6, 25.6, 31.0, 39.6, 97.1, 114.9 (d,  $J$  = 20.0 Hz), 120.5 (d,  $J$  = 5.0 Hz), 123.8, 128.2 (d,  $J$  = 8.8 Hz), 128.8, 131.9, 138.2 (d,  $J$  = 11.3 Hz), 141.5, 154.0, 157.8 (d,  $J$  = 253.8 Hz), 166.3; HRMS (TOF ES<sup>+</sup>):  $m/z$  calcd for  $\text{C}_{17}\text{H}_{18}\text{FN}_2\text{O}$  [(M+H)<sup>+</sup>], 285.1398; found, 285.1399.

**2-cyclohexyl-4-methyl-3-methylene-6-(trifluoromethyl)-2,3-dihydro-1H-pyrrolo[3,4-c]quinolin-1-one (6b')**

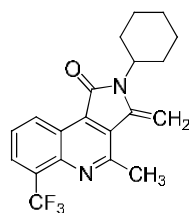

White solid; mp 164–166 °C; IR (KBr): 1691, 1511, 1375, 1303, 1133, 845, 767  $\text{cm}^{-1}$ ;  $^1\text{H}$  NMR (500 MHz,  $\text{CDCl}_3$ ):  $\delta$  = 1.33–1.38 (m, 1H,  $\text{CH}_2$ ), 1.41–1.49 (m, 2H,  $\text{CH}_2$ ), 1.77–1.80 (m, 1H,  $\text{CH}_2$ ), 1.86–1.89 (m, 2H,  $\text{CH}_2$ ), 1.89–1.98 (m, 2H,  $\text{CH}_2$ ), 2.34–2.41 (m, 2H,  $\text{CH}_2$ ), 3.05 (s, 3H,  $\text{CH}_3$ ), 4.12–4.15 (m, 1H, CH), 5.46 (d,  $J$  = 2.9 Hz, 1H,  $\text{C}=\text{CH}_2$ ), 5.69 (d,  $J$  = 2.9 Hz, 1H,  $\text{C}=\text{CH}_2$ ), 7.68–7.71 (m, 1H, ArH), 8.11 (d,  $J$  = 7.3 Hz, 1H, ArH), 9.26 (d,  $J$  = 8.1 Hz, 1H, ArH);  $^{13}\text{C}$  NMR (125 MHz,  $\text{CDCl}_3$ ):  $\delta$  = 25.8, 26.0, 26.8, 26.8, 30.3, 30.3, 53.5, 97.7, 122.8, 124.3 ( $J$  = 271.3 Hz), 126.7, 127.8 ( $J$  = 30.0 Hz), 128.4, 128.6, 128.9, 131.7, 141.2, 144.4, 154.4, 166.7; HRMS (TOF  $\text{ES}^+$ ):  $m/z$  calcd for  $\text{C}_{20}\text{H}_{20}\text{F}_3\text{N}_2\text{O}$  [( $\text{M}+\text{H}$ ) $^+$ ], 361.1522; found, 361.1526.

**2-butyl-4-methyl-3-methylene-6-(trifluoromethyl)-2,3-dihydro-1H-pyrrolo[3,4-c]quinolin-1-one (6c')**

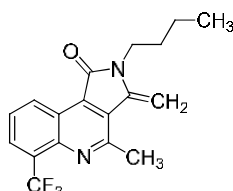

White solid; mp 113–115 °C; IR (KBr): 1701, 1578, 1510, 1452, 1348, 1300, 1130, 840, 675  $\text{cm}^{-1}$ ;  $^1\text{H}$  NMR (500 MHz,  $\text{CDCl}_3$ ):  $\delta$  = 0.99–1.02 (m, 3H,  $\text{CH}_3$ ), 1.42–1.49 (m, 2H,  $\text{CH}_2$ ), 1.70–1.76 (m, 2H,  $\text{CH}_2$ ), 3.05 (s, 3H,  $\text{CH}_3$ ), 3.88–3.91 (m, 2H,  $\text{CH}_2$ ), 5.30 (d,  $J$  = 2.9 Hz, 1H,  $\text{C}=\text{CH}_2$ ), 5.65 (d,  $J$  = 2.9 Hz, 1H,  $\text{C}=\text{CH}_2$ ), 7.69–7.72 (m, 1H, ArH), 8.12 (d,  $J$  = 7.3 Hz, 1H, ArH), 9.24 (d,  $J$  = 8.2 Hz, 1H, ArH);  $^{13}\text{C}$  NMR (125 MHz,  $\text{CDCl}_3$ ):  $\delta$  = 14.2, 20.6, 25.8, 31.0, 39.6, 97.2, 122.8, 124.4 ( $J$  = 271.3 Hz), 126.8, 127.8 ( $J$  = 28.8 Hz), 128.5, 128.7, 128.8, 131.8, 141.4, 145.8, 154.5, 166.5; HRMS (TOF  $\text{ES}^+$ ):  $m/z$  calcd for  $\text{C}_{18}\text{H}_{18}\text{F}_3\text{N}_2\text{O}$  [( $\text{M}+\text{H}$ ) $^+$ ], 335.1366; found, 335.1374.

**4-methyl-3-methylene-2-((tetrahydrofuran-2-yl)methyl)-6-(trifluoromethyl)-2,3-dihydro-1H-pyrrolo[3,4-c]quinolin-1-one (6d')**

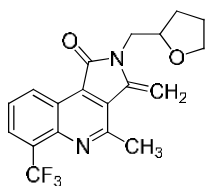

White solid; mp 146–148 °C; IR (KBr): 1695, 1581, 1395, 1349, 1305, 1120, 1085, 873, 786, 680, 559  $\text{cm}^{-1}$ ;  $^1\text{H}$  NMR (500 MHz,  $\text{CDCl}_3$ ):  $\delta$  = 1.76–1.81 (m, 1H,  $\text{CH}_2$ ), 1.92–1.98 (m, 2H,  $\text{CH}_2$ ), 2.05–2.10 (m, 1H,  $\text{CH}_2$ ), 3.04 (s, 3H,  $\text{CH}_3$ ), 3.76–3.80 (m, 1H,  $\text{CH}_2$ ), 3.91–3.96 (m, 2H,  $\text{CH}_2$ ), 4.03–4.07 (m, 1H,  $\text{CH}_2$ ), 4.28–4.30 (m, 1H, CH), 5.55 (d,  $J$  = 2.7 Hz, 1H,  $\text{C}=\text{CH}_2$ ), 5.69 (d,  $J$  = 2.7 Hz, 1H,  $\text{C}=\text{CH}_2$ ), 7.69–7.72 (m, 1H, ArH), 8.12 (d,  $J$  = 7.3 Hz, 1H, ArH), 9.23 (d,  $J$  = 8.3 Hz, 1H, ArH);  $^{13}\text{C}$  NMR (125 MHz,  $\text{CDCl}_3$ ):  $\delta$  = 25.9, 26.0, 29.7, 44.1, 68.7, 98.6, 122.7, 124.4 ( $J$  = 272.5 Hz), 126.8, 127.8 ( $J$  = 30.0 Hz), 128.7, 128.7, 128.8, 129.0, 131.5, 141.7, 144.5, 154.6, 166.8; HRMS (TOF  $\text{ES}^+$ ):  $m/z$  calcd for  $\text{C}_{19}\text{H}_{18}\text{F}_3\text{N}_2\text{O}_2$  [( $\text{M}+\text{H}$ ) $^+$ ], 363.1315; found, 363.1314.

**2-(furan-2-ylmethyl)-4-methyl-3-methylene-6-(trifluoromethyl)-2,3-dihydro-1H-pyrrolo[3,4-c]quinolin-1-one**

**one (6e')**

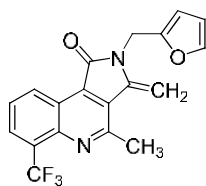

White solid; mp 141–143 °C; IR (KBr): 1705, 1630, 1509, 1346, 1135, 1083, 1011, 952, 848, 771, 676, 642  $\text{cm}^{-1}$ ;  $^1\text{H}$  NMR (500 MHz,  $\text{CDCl}_3$ ):  $\delta$  = 3.02 (s, 3H,  $\text{CH}_3$ ), 5.08 (s, 2H,  $\text{CH}_2$ ), 5.50 (d,  $J$  = 3.0 Hz, 1H,  $\text{C}=\text{CH}_2$ ), 5.66 (d,  $J$  = 3.0 Hz, 1H,  $\text{C}=\text{CH}_2$ ), 6.35 (d,  $J$  = 4.2 Hz, 2H, CH), 7.38 (s, 1H, CH), 7.69–7.72 (m, 1H, ArH), 8.12 (d,  $J$  = 7.3 Hz, 1H, ArH), 9.24 (d,  $J$  = 8.4 Hz, 1H, ArH);  $^{13}\text{C}$  NMR (125 MHz,  $\text{CDCl}_3$ ):  $\delta$  = 25.8, 36.6, 98.2, 108.8, 111.0, 122.7, 124.3 ( $J$  = 271.3 Hz), 126.9, 127.8 ( $J$  = 28.8 Hz), 128.6, 128.9, 129.0, 131.4, 140.9, 142.9, 144.5, 150.0, 154.6, 166.1; HRMS (TOF  $\text{ES}^+$ ):  $m/z$  calcd for  $\text{C}_{19}\text{H}_{14}\text{F}_3\text{N}_2\text{O}_2$  [( $\text{M}+\text{H}$ ) $^+$ ], 359.1002; found, 359.1005

**2-butyl-4-methyl-3-methylene-8-nitro-2,3-dihydro-1H-pyrrolo[3,4-c]quinolin-1-one (6f')**

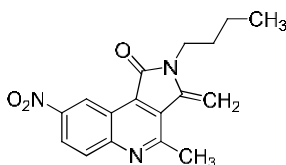

Yellow solid; mp 203–205 °C; IR (KBr): 1698, 1634, 1495, 1395, 1229, 1080, 913, 845, 760, 633, 573  $\text{cm}^{-1}$ ;  $^1\text{H}$  NMR (500 MHz,  $\text{CDCl}_3$ ):  $\delta$  = 0.99–1.02 (m, 3H,  $\text{CH}_3$ ), 1.42–1.49 (m, 2H,  $\text{CH}_2$ ), 1.71–1.77 (m, 2H,  $\text{CH}_2$ ), 3.04 (s, 3H,  $\text{CH}_3$ ), 3.90–3.93 (m, 2H,  $\text{CH}_2$ ), 5.37 (d,  $J$  = 2.9 Hz, 1H,  $\text{C}=\text{CH}_2$ ), 5.69 (d,  $J$  = 2.9 Hz, 1H,  $\text{C}=\text{CH}_2$ ), 8.19 (d,  $J$  = 8.3 Hz, 1H, ArH), 8.50–8.52 (m, 1H, ArH), 9.86 (d,  $J$  = 2.4 Hz, 1H, ArH);  $^{13}\text{C}$  NMR (125 MHz,  $\text{CDCl}_3$ ):  $\delta$  = 14.2, 20.6, 25.7, 31.0, 39.8, 98.1, 121.2, 121.6, 124.1, 129.5, 130.7, 133.4, 141.1, 146.8, 149.9, 157.5, 165.6; HRMS (TOF  $\text{ES}^+$ ):  $m/z$  calcd for  $\text{C}_{17}\text{H}_{18}\text{N}_3\text{O}_3$  [( $\text{M}+\text{H}$ ) $^+$ ], 312.1343; found, 312.1349.

**4-methyl-3-methylene-8-nitro-2-phenyl-2,3-dihydro-1H-pyrrolo[3,4-c]quinolin-1-one (6g')**

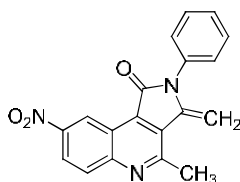

Yellow solid; mp 226–228 °C; IR (KBr): 1700, 1528, 1498, 1379, 1337, 1117, 917, 887, 723  $\text{cm}^{-1}$ ;  $^1\text{H}$  NMR (500 MHz,  $\text{CDCl}_3$ ):  $\delta$  = 3.10 (s, 3H,  $\text{CH}_3$ ), 5.27 (d,  $J$  = 2.7 Hz, 1H,  $\text{C}=\text{CH}_2$ ), 5.73 (d,  $J$  = 2.7 Hz, 1H,  $\text{C}=\text{CH}_2$ ), 7.43 (d,  $J$  = 7.6 Hz, 2H, ArH), 7.51–7.54 (m, 1H, ArH), 7.59–7.62 (m, 2H, ArH), 8.25 (d,  $J$  = 9.35 Hz, 1H, ArH), 8.54–8.56 (m, 1H, ArH), 9.90 (d,  $J$  = 2.5 Hz, 1H, ArH);  $^{13}\text{C}$  NMR (125 MHz,  $\text{CDCl}_3$ ):  $\delta$  = 25.8, 100.2, 121.3, 121.6, 124.3, 128.9, 128.9, 129.3, 129.4, 130.1, 130.1, 130.8, 132.8, 133.9, 142.5, 146.9, 150.1, 157.7, 165.3; HRMS (TOF  $\text{ES}^+$ ):  $m/z$  calcd for  $\text{C}_{19}\text{H}_{14}\text{N}_3\text{O}_3$  [( $\text{M}+\text{H}$ ) $^+$ ], 332.1030; found, 332.1032.

**4-methyl-3-methylene-8-(morpholinosulfonyl)-2-phenyl-2,3-dihydro-1H-pyrrolo[3,4-c]quinolin-1-one (6h')**

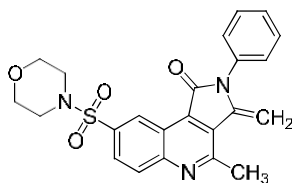

Yellow solid; mp 224–226 °C; IR (KBr): 1708, 1631, 1499, 1265, 1163, 1112, 947, 839, 741, 635, 599  $\text{cm}^{-1}$ ;  $^1\text{H}$  NMR (500 MHz,  $\text{CDCl}_3$ ):  $\delta$  = 3.10 (s, 3H,  $\text{CH}_3$ ), 3.11–3.13 (m, 4H,  $\text{CH}_2$ ), 3.74–3.76 (m, 4H,  $\text{CH}_2$ ), 5.25 (d,  $J$  = 2.8 Hz, 1H,  $\text{C}=\text{CH}_2$ ), 5.72 (d,  $J$  = 2.8 Hz, 1H,  $\text{C}=\text{CH}_2$ ), 7.43 (d,  $J$  = 7.5 Hz, 2H, ArH), 7.50–7.53 (m, 1H, ArH), 7.58–7.61 (m, 2H, ArH), 8.10–8.12 (m, 1H, ArH), 8.29 (d,  $J$  = 8.9 Hz, 1H, ArH), 9.47 (d,  $J$  = 2.0 Hz, 1H, ArH);  $^{13}\text{C}$  NMR (125 MHz,  $\text{CDCl}_3$ ):  $\delta$  = 25.7, 46.5, 46.5, 66.5, 66.5, 100.0, 121.6, 125.7, 128.3, 128.9, 128.9, 129.3, 130.1, 130.1, 130.1, 130.5, 132.2, 133.9, 135.3, 142.7, 149.4, 157.0, 165.6; HRMS (TOF  $\text{ES}^+$ ):  $m/z$  calcd for  $\text{C}_{23}\text{H}_{21}\text{N}_3\text{NaO}_4\text{S}$  [(M+Na) $^+$ ], 458.1145; found, 458.1149.

**2-(2-bromophenyl)-4-methyl-1H-pyrrolo[3,4-c]quinoline-1,3(2H)-dione (7a).**

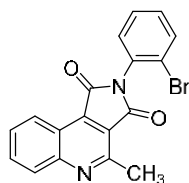

White solid; mp 202–204 °C; IR (KBr): 1712, 1625, 1476, 1371, 1126, 1096, 1028, 754, 737, 665  $\text{cm}^{-1}$ ;  $^1\text{H}$  NMR (400 MHz,  $\text{CDCl}_3$ ):  $\delta$  = 3.10 (s, 3H,  $\text{C}-\text{CH}_3$ ), 7.38–7.42 (m, 2H, ArH), 7.48–7.52 (m, 1H, ArH), 7.72–7.79 (m, 2H, ArH), 7.89–7.94 (m, 1H, ArH), 8.17 (d,  $J$  = 8.4 Hz, 1H, ArH), 8.84 (d,  $J$  = 8.4 Hz, 1H, ArH);  $^{13}\text{C}$  NMR (100 MHz,  $\text{CDCl}_3$ ):  $\delta$  = 22.3, 120.8, 121.8, 123.4, 125.1, 128.5, 129.2, 129.4, 131.0, 131.0, 131.2, 133.0, 133.7, 135.8, 151.8, 155.4, 166.6, 166.8; HRMS (TOF  $\text{ES}^+$ ):  $m/z$  calcd for  $\text{C}_{18}\text{H}_{12}\text{BrN}_2\text{O}_2$  [(M+H) $^+$ ], 367.0082; found, 367.0085.

**2-(2-chlorophenyl)-4-methyl-1H-pyrrolo[3,4-c]quinoline-1,3(2H)-dione (7b).**

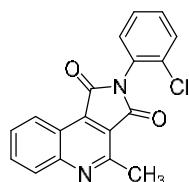

White solid; mp 184–186 °C; IR (KBr): 1714, 1624, 1483, 1373, 1115, 1065, 1029, 754, 737, 691  $\text{cm}^{-1}$ ;  $^1\text{H}$  NMR (400 MHz,  $\text{CDCl}_3$ ):  $\delta$  = 3.10 (s, 3H,  $\text{C}-\text{CH}_3$ ), 7.40–7.47 (m, 3H, ArH), 7.59–7.61 (m, 1H, ArH), 7.71–7.75 (m, 1H, ArH), 7.89–7.93 (m, 1H, ArH), 8.16 (d,  $J$  = 8.8 Hz, 1H, ArH), 8.83 (d,  $J$  = 8.4 Hz, 1H, ArH);  $^{13}\text{C}$  NMR (100 MHz,  $\text{CDCl}_3$ ):  $\delta$  = 22.3, 120.8, 121.8, 125.1, 127.8, 129.2, 129.2, 129.4, 130.5, 130.8, 130.9, 133.0, 133.3, 135.9, 151.8, 155.4, 166.6, 166.8; HRMS (TOF  $\text{ES}^+$ ):  $m/z$  calcd for  $\text{C}_{18}\text{H}_{12}\text{ClN}_2\text{O}_2$  [(M+H) $^+$ ], 323.0587; found, 323.0588.

#### 4. X-ray Structure and Data<sup>3</sup> of **6p** (CCDC 1438897)

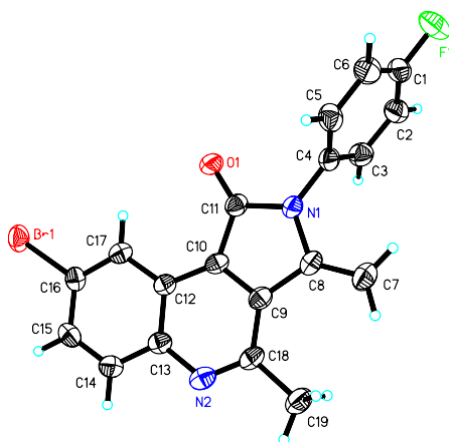

**Figure S1** X-Ray crystal structure of **6p**

**Table S1** Crystal data and structure refinement for **6p**

|                                 |                                                     |                        |
|---------------------------------|-----------------------------------------------------|------------------------|
| Empirical formula               | C <sub>19</sub> H <sub>12</sub> BrFN <sub>2</sub> O |                        |
| Formula weight                  | 383.22                                              |                        |
| Temperature                     | 293(2) K                                            |                        |
| Wavelength                      | 0.71073 Å                                           |                        |
| Crystal system, space group     | Monoclinic, C2/c                                    |                        |
| Unit cell dimensions            | a = 17.326(3) Å                                     | alpha = 90.00 deg.     |
|                                 | b = 17.185(3) Å                                     | beta = 108.741(2) deg. |
|                                 | c = 11.370(2) Å                                     | gamma = 90.00 deg.     |
| Volume                          | 3205.9(10) Å <sup>3</sup>                           |                        |
| Z, Calculated density           | 8, 1.588 Mg/m <sup>3</sup>                          |                        |
| Absorption coefficient          | 2.583 mm <sup>-1</sup>                              |                        |
| F(000)                          | 1536                                                |                        |
| Crystal size                    | 0.32 x 0.20 x 0.18 mm                               |                        |
| Theta range for data collection | 2.37 to 18.34 deg.                                  |                        |
| Limiting indices                | -22 ≤ h ≤ 22, -22 ≤ k ≤ 22, -14 ≤ l ≤ 15            |                        |
| Reflection collected/unique     | 15065/3819 [R(int) = 0.0885]                        |                        |
| Completeness to theta = 28.24   | 96.1%                                               |                        |
| Absorption correction           | fine-focus sealed tube                              |                        |
| Max. and min. transmission      | 0.9506 and 0.9811                                   |                        |
| Refinement method               | phi and omega scans                                 |                        |
| Data/restraints/parameters      | 3819 / 0 / 218                                      |                        |

|                                   |                                    |
|-----------------------------------|------------------------------------|
| Goodness-of-fit on F <sup>2</sup> | 0.919                              |
| Final R indices [I>2σ(I)]         | R1 = 0.1492, wR2 = 0.1347          |
| R indices (all data)              | R1 = 0.0480, wR2 = 0.1003          |
| Semi-empirical from equivalents   | 0.287 and -0.354 e.Å <sup>-3</sup> |

---

**Table S2** Bond lengths [Å] and angles [deg] for **6p**

|             |          |
|-------------|----------|
| F(1)-C(1)   | 1.351(4) |
| F(2)-C(12)  | 1.361(4) |
| N(1)-C(7)   | 1.325(4) |
| N(1)-C(15)  | 1.379(4) |
| N(2)-C(17)  | 1.378(4) |
| N(2)-C(18)  | 1.429(4) |
| N(2)-C(16)  | 1.443(4) |
| O(1)-C(25)  | 1.352(5) |
| O(1)-C(16)  | 1.442(4) |
| O(2)-C(17)  | 1.212(4) |
| O(3)-C(24)  | 1.375(5) |
| O(3)-C(21)  | 1.376(4) |
| O(4)-C(25)  | 1.179(5) |
| C(1)-C(2)   | 1.353(5) |
| C(1)-C(6)   | 1.366(5) |
| C(2)-C(3)   | 1.383(5) |
| C(2)-H(2)   | 0.9300   |
| C(3)-C(4)   | 1.386(5) |
| C(3)-H(3)   | 0.9300   |
| C(4)-C(5)   | 1.383(5) |
| C(4)-C(7)   | 1.483(4) |
| C(5)-C(6)   | 1.378(5) |
| C(5)-H(5)   | 0.9300   |
| C(6)-H(6)   | 0.9300   |
| C(7)-C(8)   | 1.404(4) |
| C(8)-C(9)   | 1.354(4) |
| C(8)-C(16)  | 1.500(4) |
| C(9)-C(10)  | 1.424(4) |
| C(9)-C(17)  | 1.486(5) |
| C(10)-C(11) | 1.410(4) |
| C(10)-C(15) | 1.411(4) |
| C(11)-C(12) | 1.348(5) |
| C(11)-H(11) | 0.9300   |
| C(12)-C(13) | 1.380(5) |
| C(13)-C(14) | 1.360(4) |
| C(13)-H(13) | 0.9300   |
| C(14)-C(15) | 1.410(4) |



|              |          |
|--------------|----------|
| C(14)-H(14)  | 0.9300   |
| C(16)-H(16)  | 0.9800   |
| C(18)-C(23)  | 1.377(5) |
| C(18)-C(19)  | 1.382(4) |
| C(19)-C(20)  | 1.374(5) |
| C(19)-H(19)  | 0.9300   |
| C(20)-C(21)  | 1.363(5) |
| C(20)-H(20)  | 0.9300   |
| C(21)-C(22)  | 1.383(5) |
| C(22)-C(23)  | 1.377(5) |
| C(22)-H(22)  | 0.9300   |
| C(23)-H(23)  | 0.9300   |
| C(24)-H(24A) | 0.9600   |
| C(24)-H(24B) | 0.9600   |
| C(24)-H(24C) | 0.9600   |
| C(25)-C(26)  | 1.495(6) |
| C(26)-H(26A) | 0.9600   |
| C(26)-H(26B) | 0.9600   |
| C(26)-H(26C) | 0.9600   |

## 5. NMR spectra ( $^1\text{H}$ NMR and $^{13}\text{C}$ NMR)

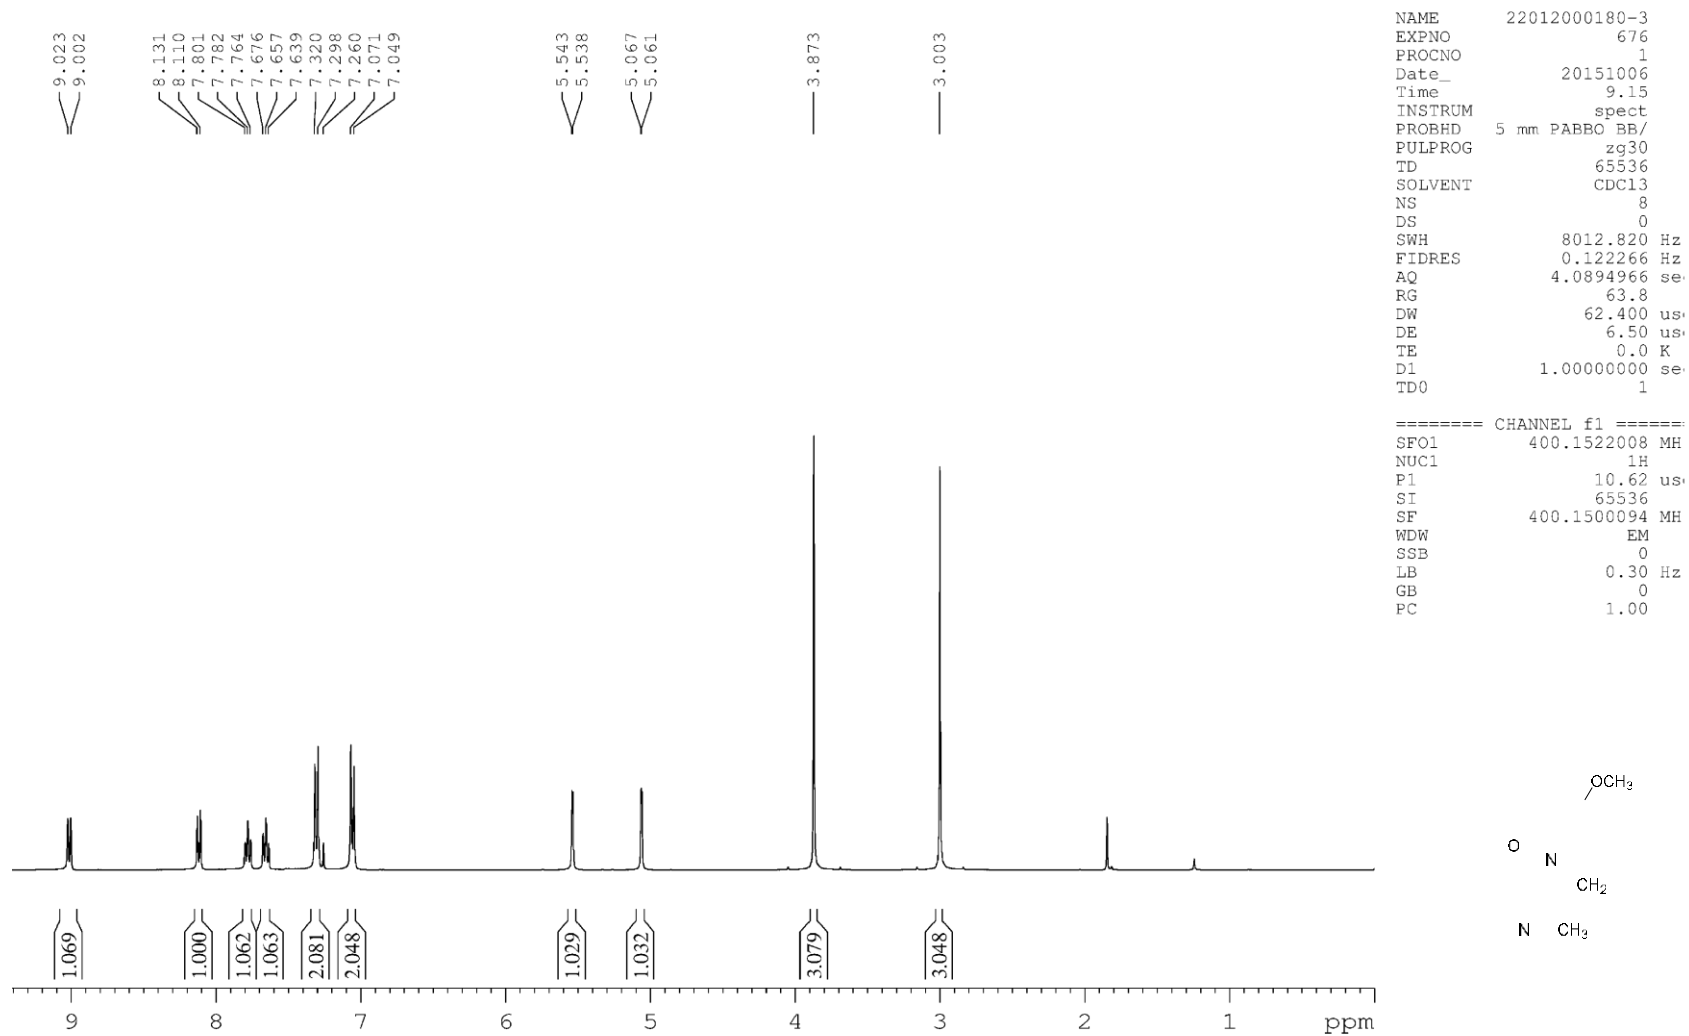

**Figure 1.** <sup>1</sup>H NMR (400 MHz, CDCl<sub>3</sub>) spectra of compound **6a**

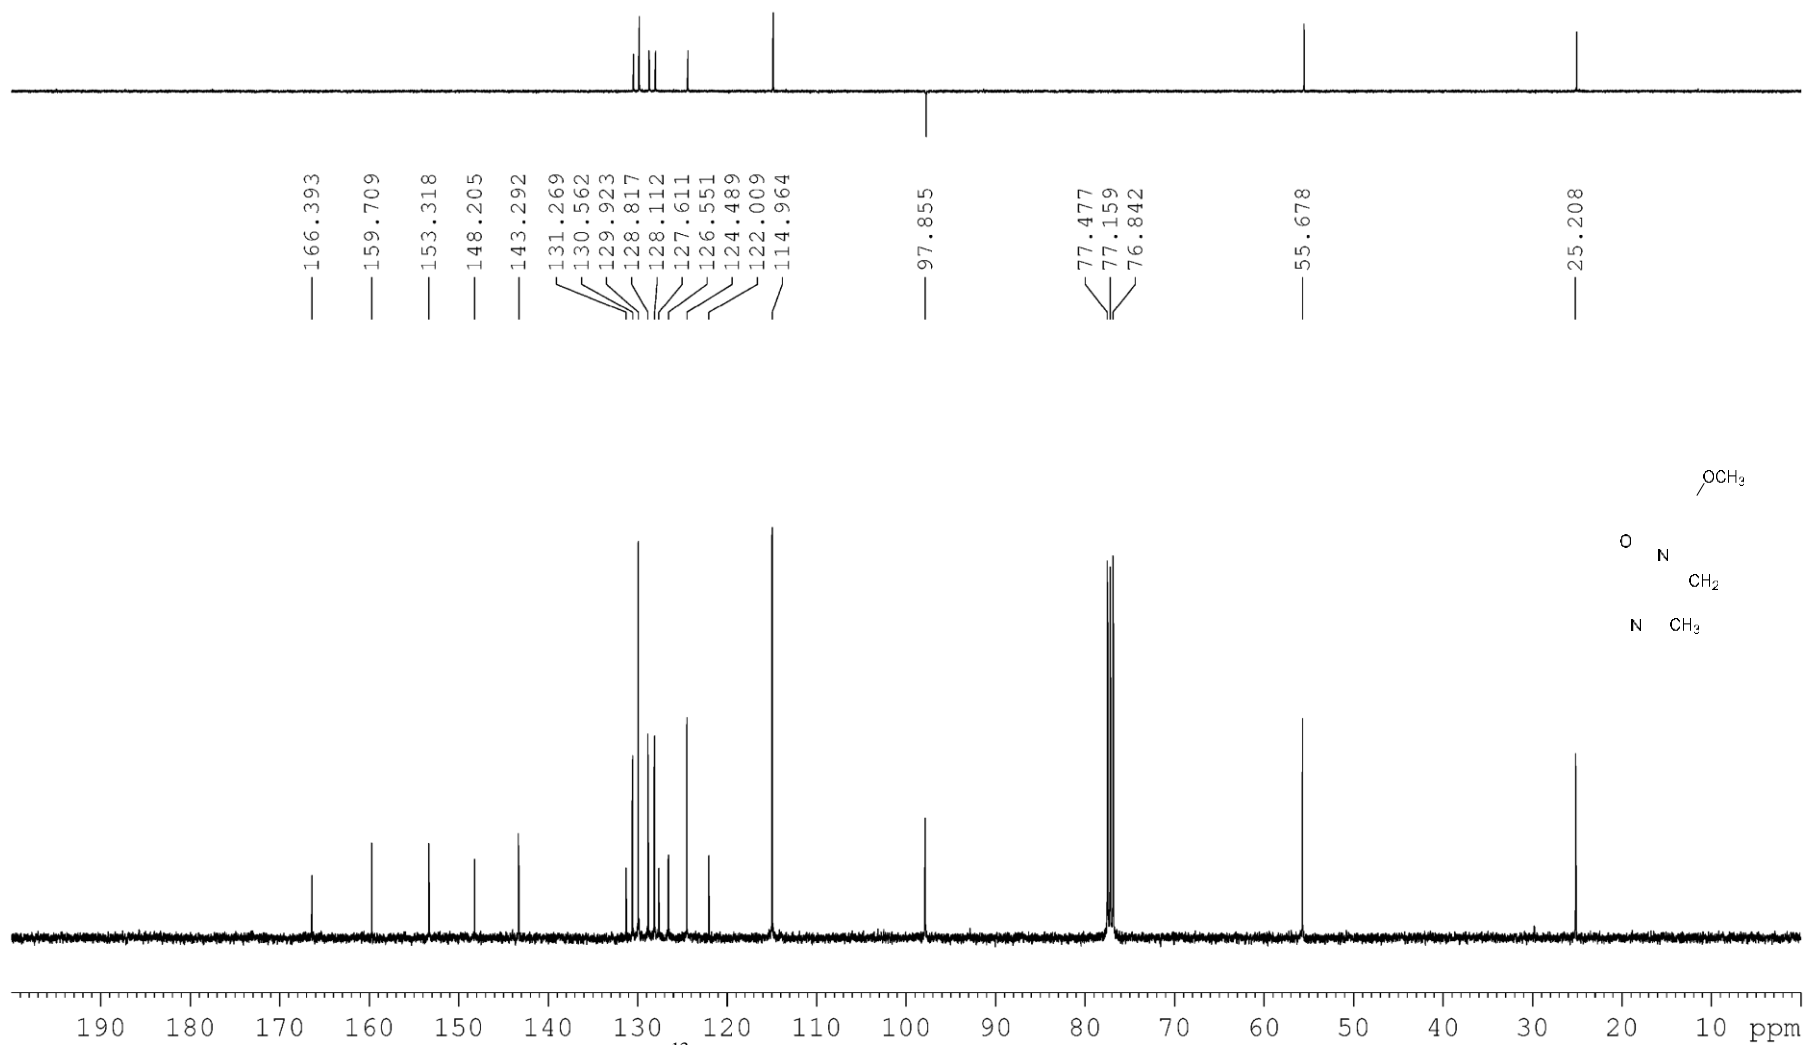

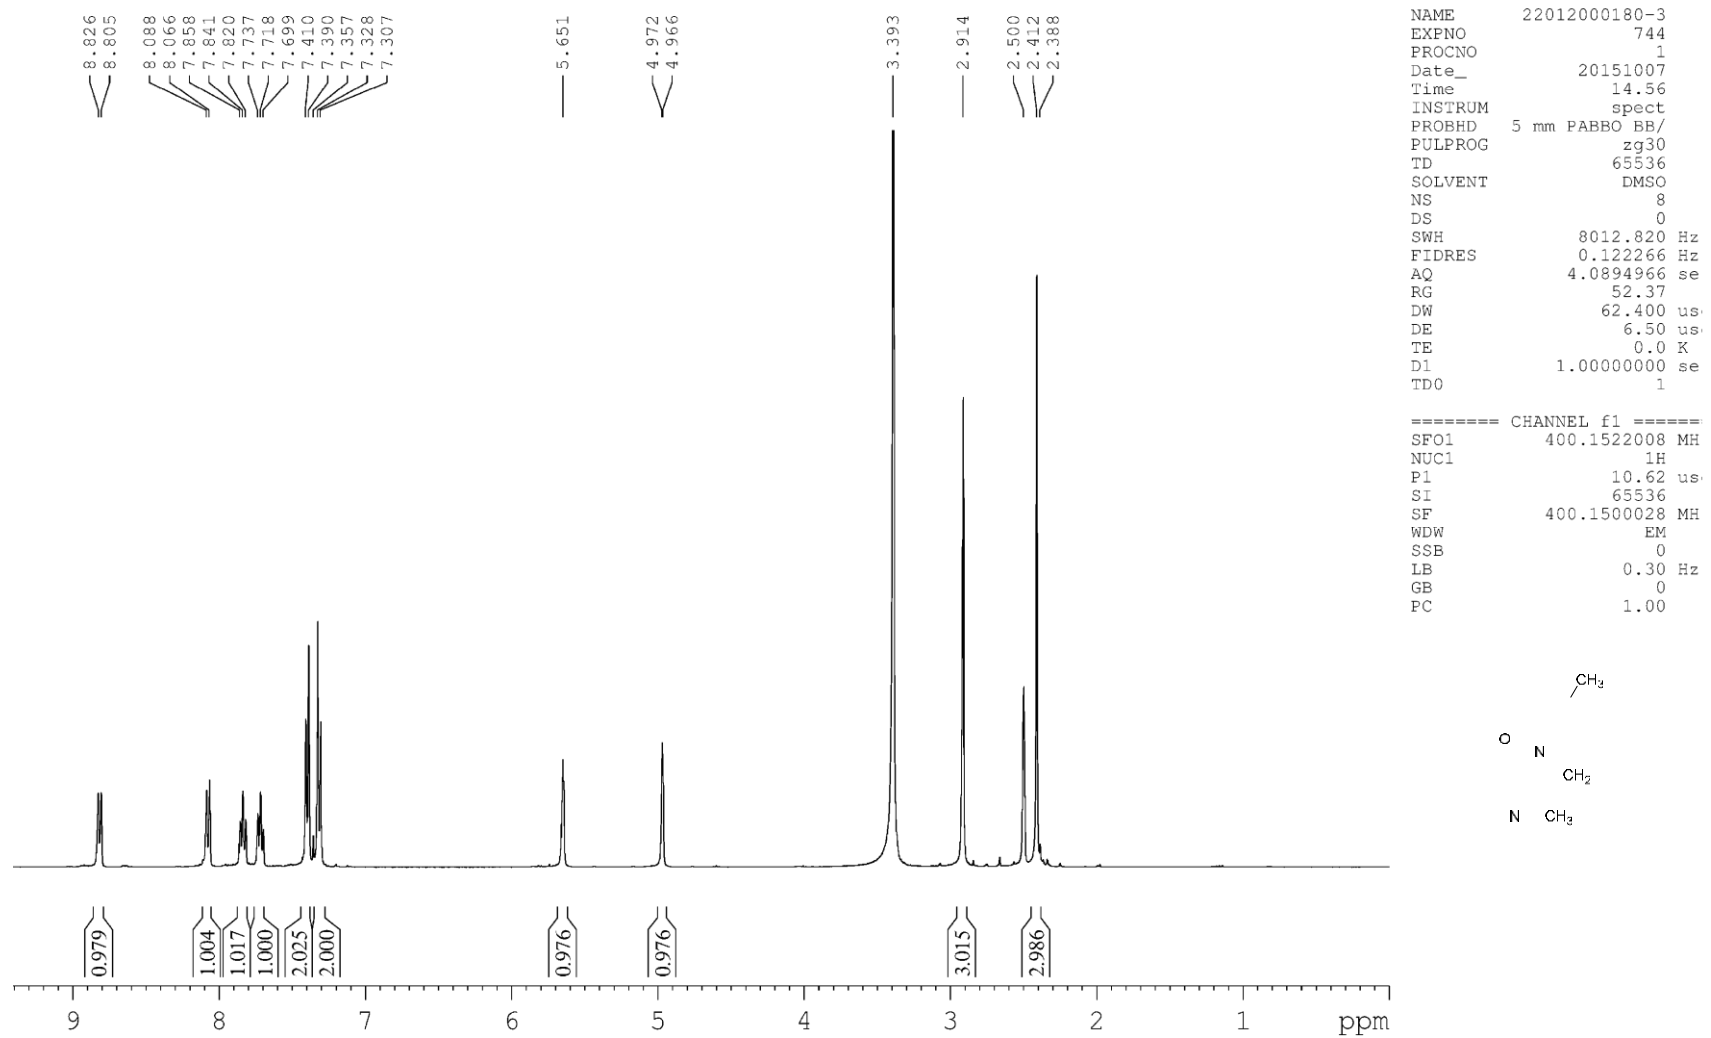

**Figure 3.** <sup>1</sup>H NMR (400 MHz, DMSO-*d*<sub>6</sub>) spectra of compound **6b**

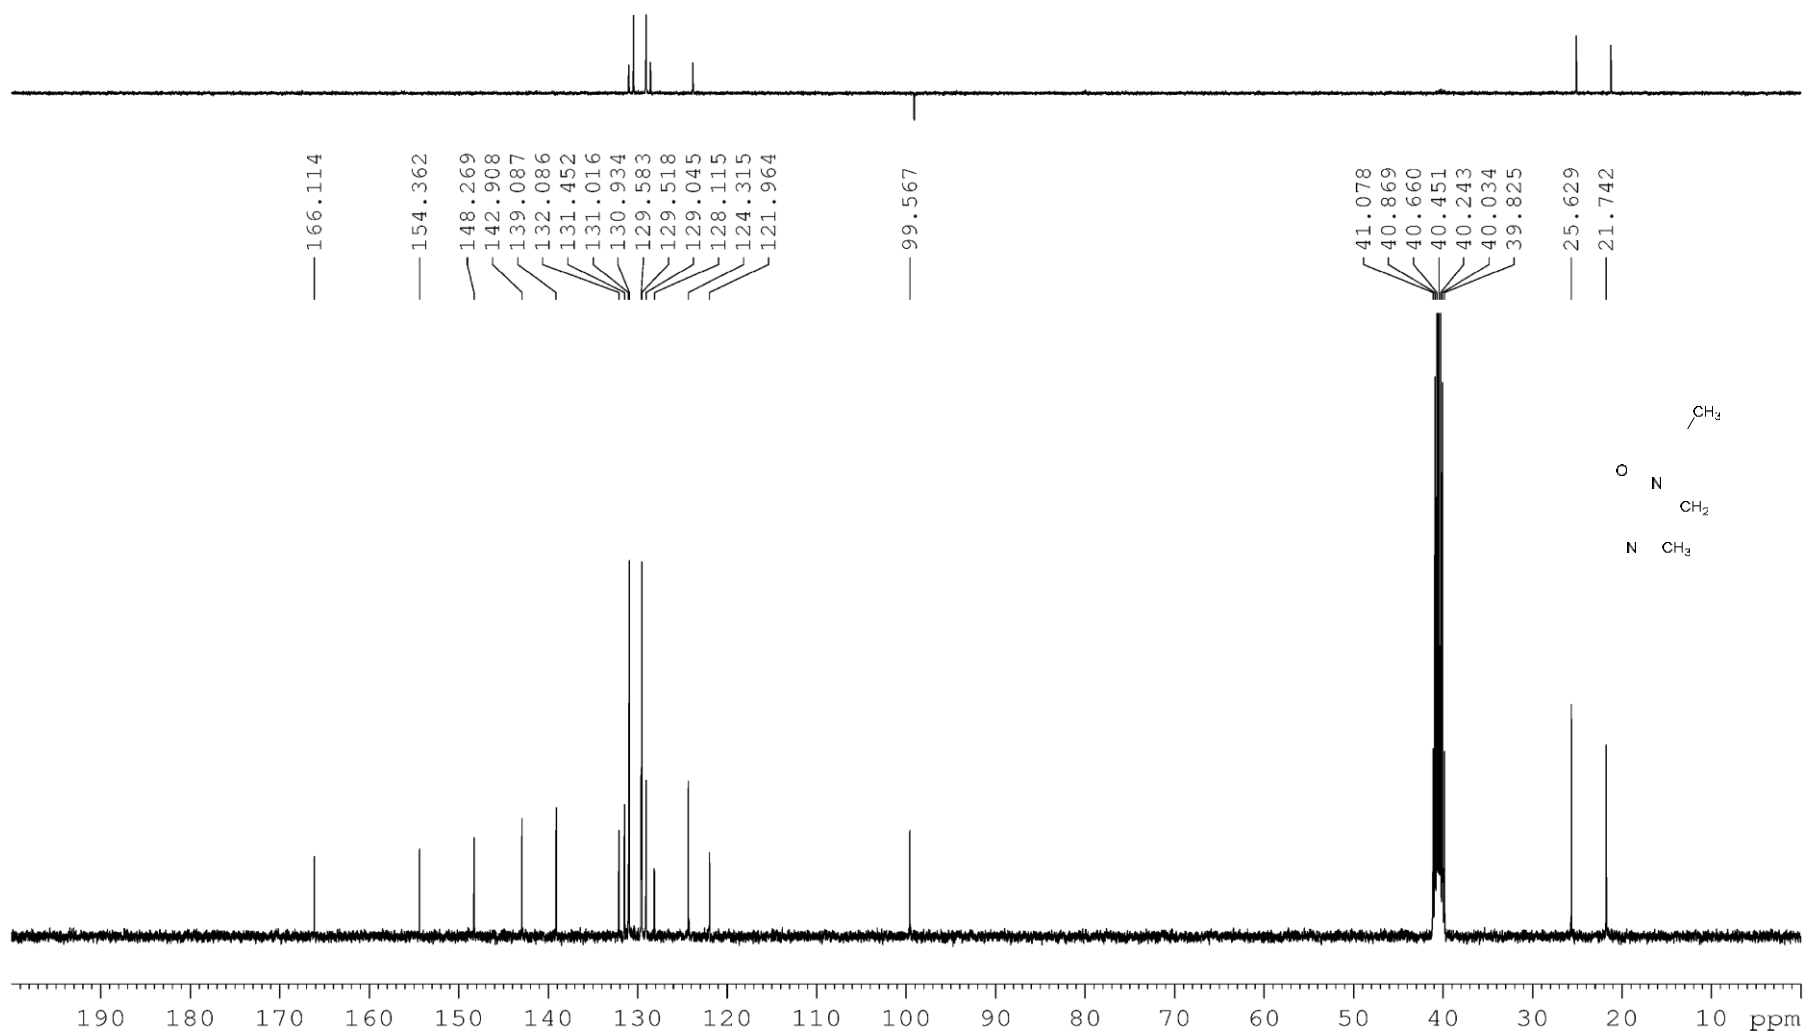

**Figure 4.** <sup>13</sup>C NMR (100 MHz, DMSO-*d*<sub>6</sub>) spectra of compound **6b**

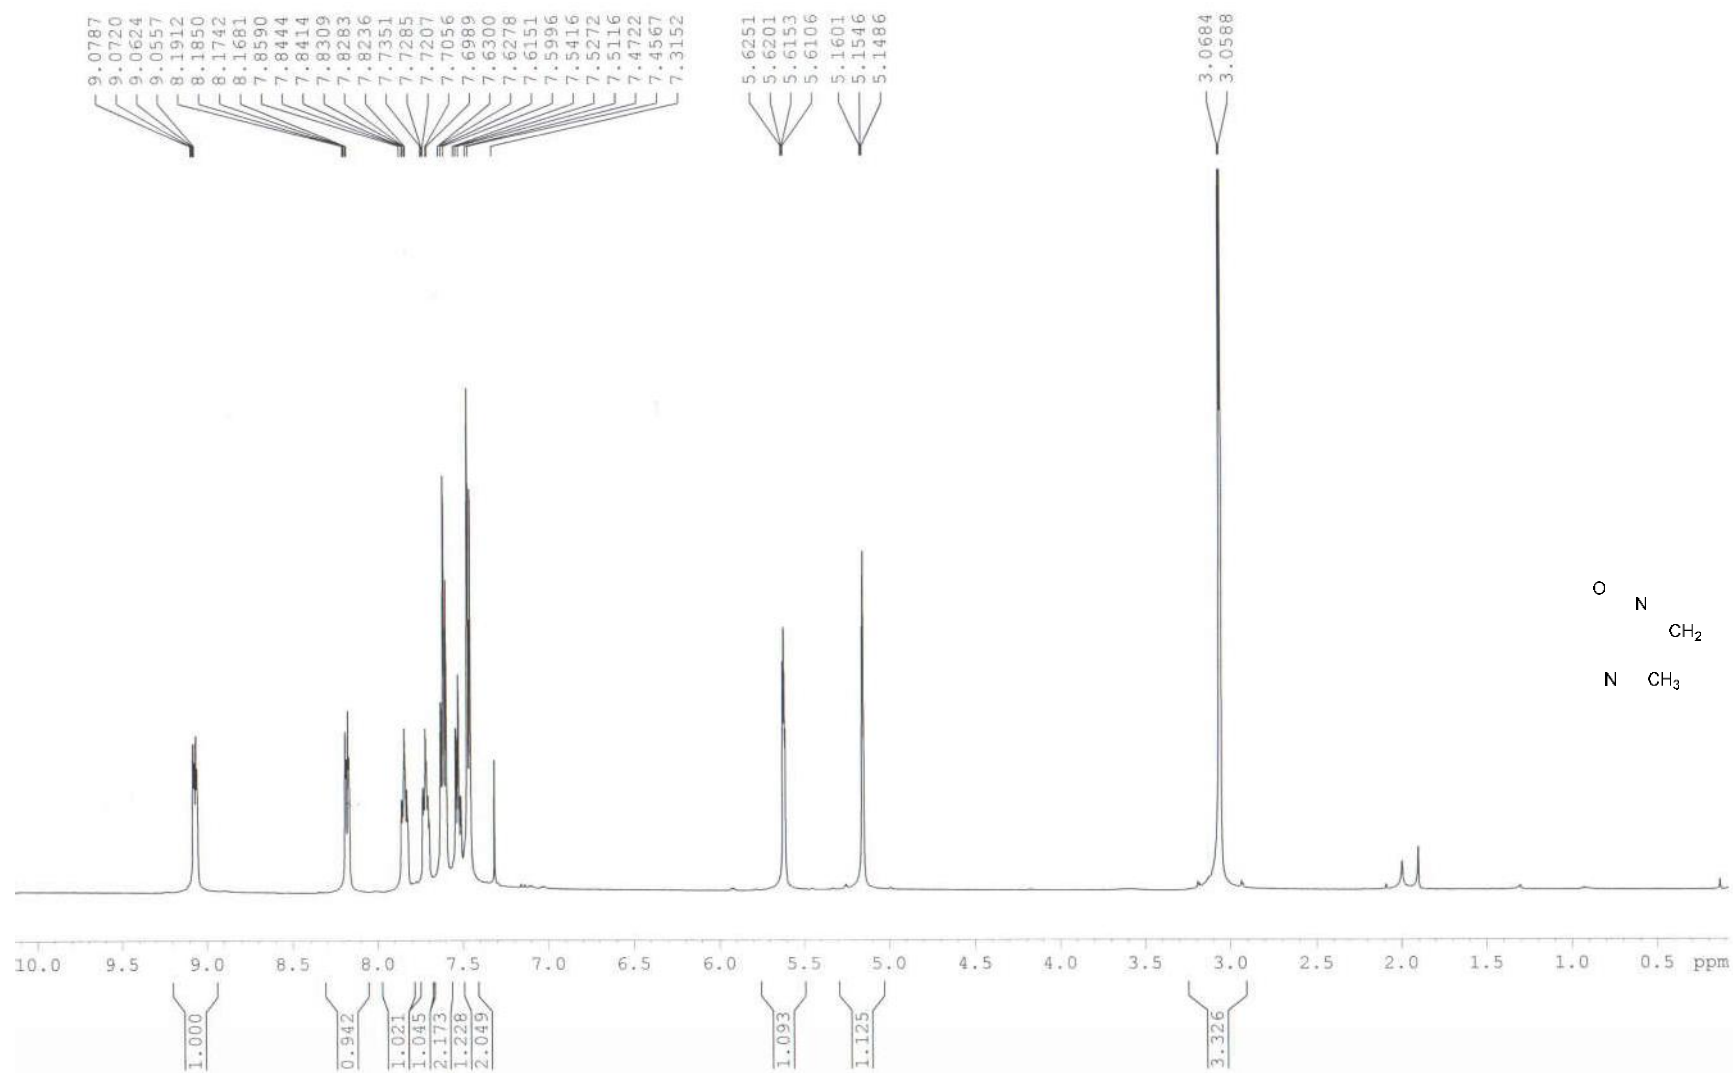

**Figure 5.** <sup>1</sup>H NMR (500 MHz, CDCl<sub>3</sub>) spectra of compound **6c**

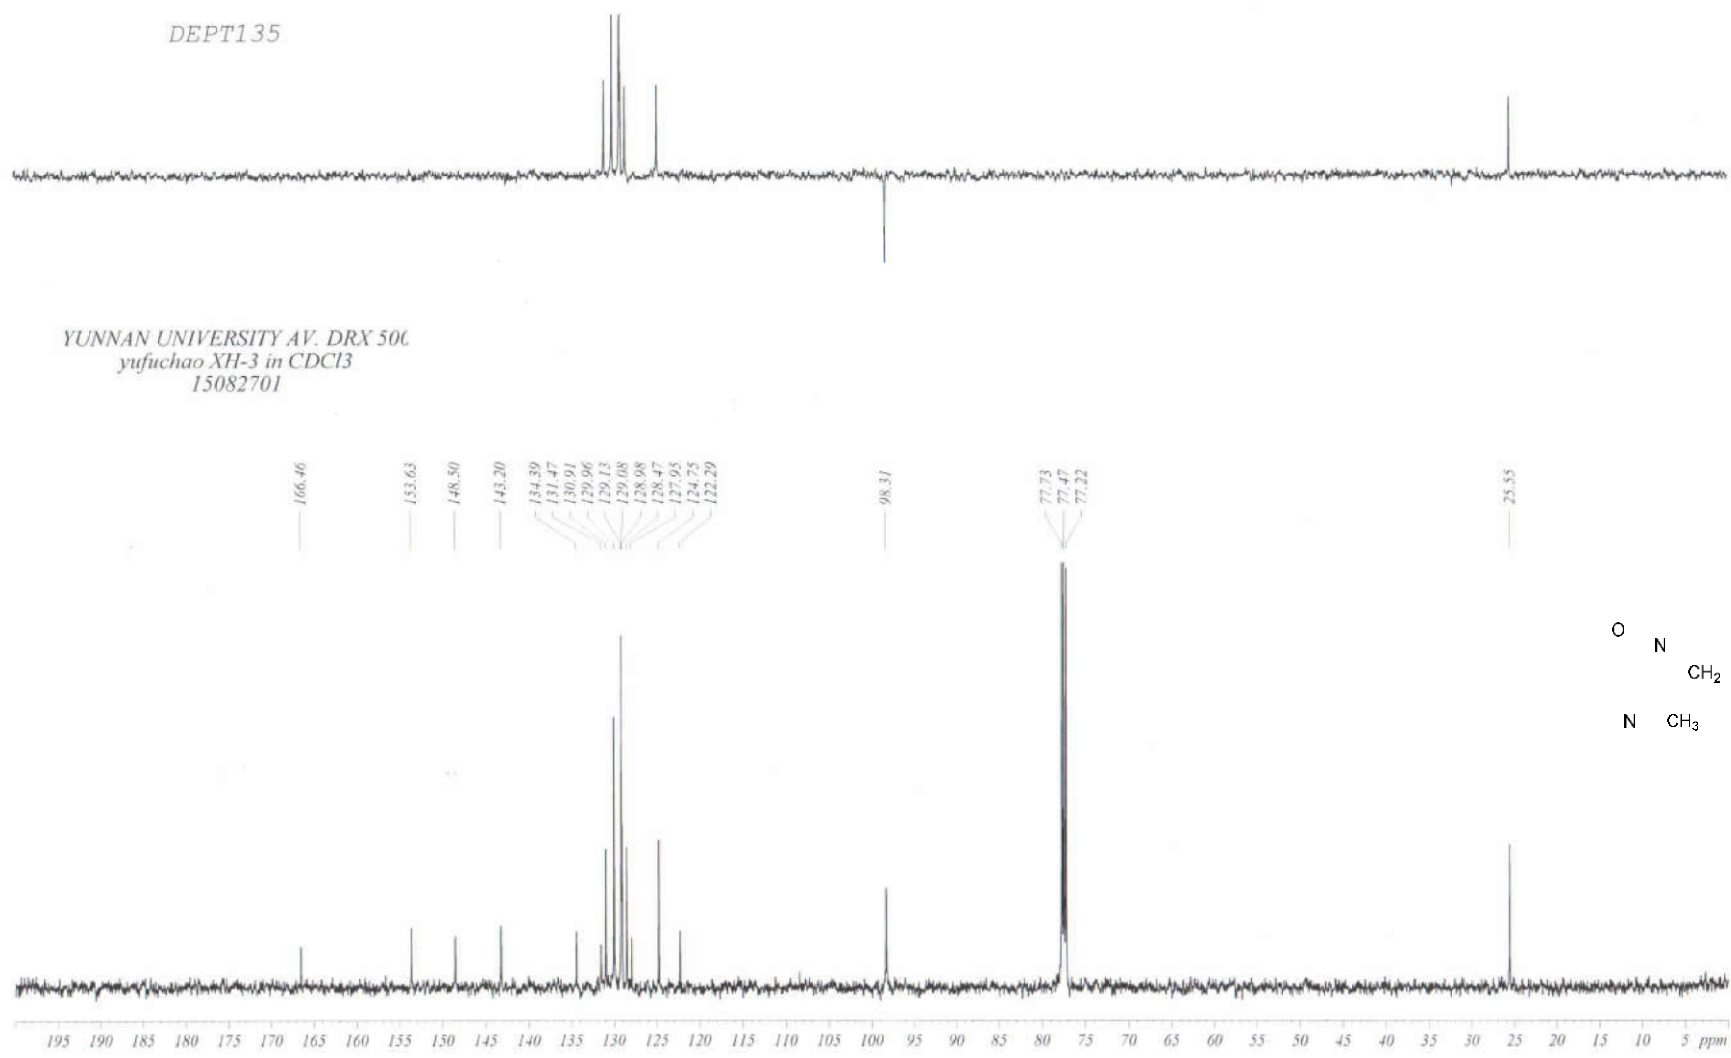

Figure 6. <sup>13</sup>C NMR (125 MHz, CDCl<sub>3</sub>) spectra of compound **6c**



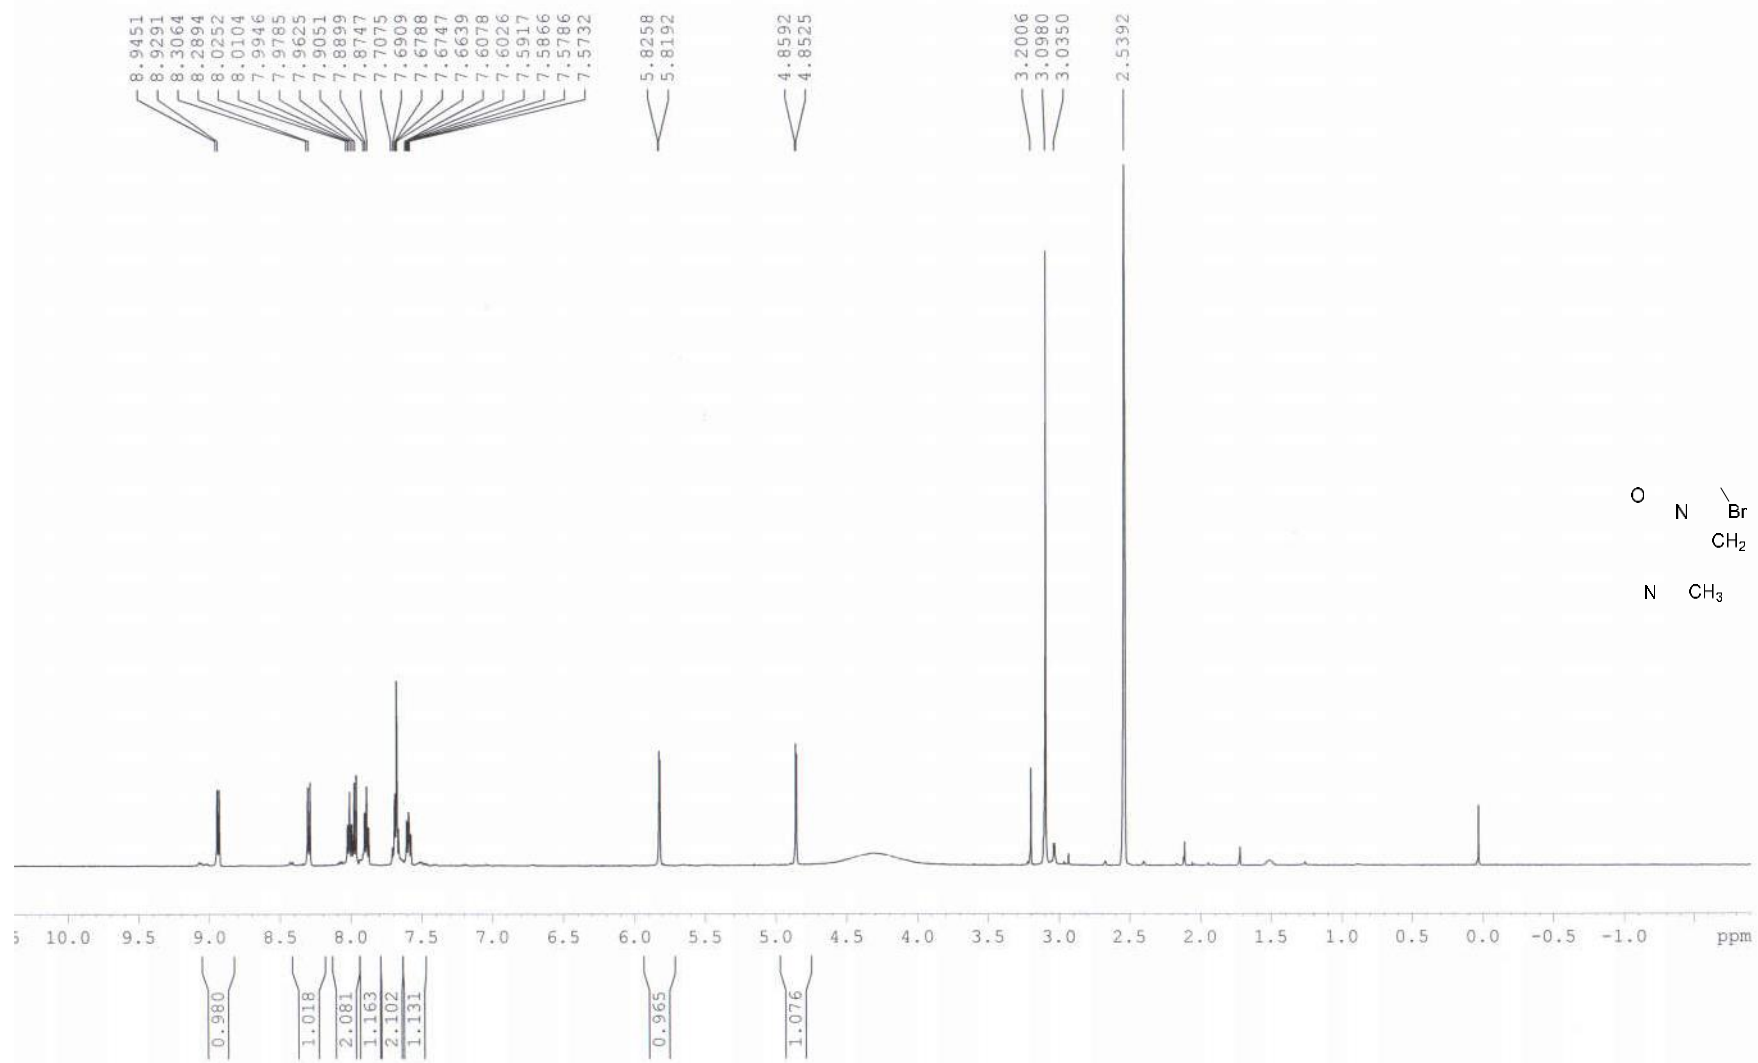

**Figure 7.**  $^1\text{H}$  NMR (500 MHz,  $\text{DMSO-}d_6$ ) spectra of compound **6d**

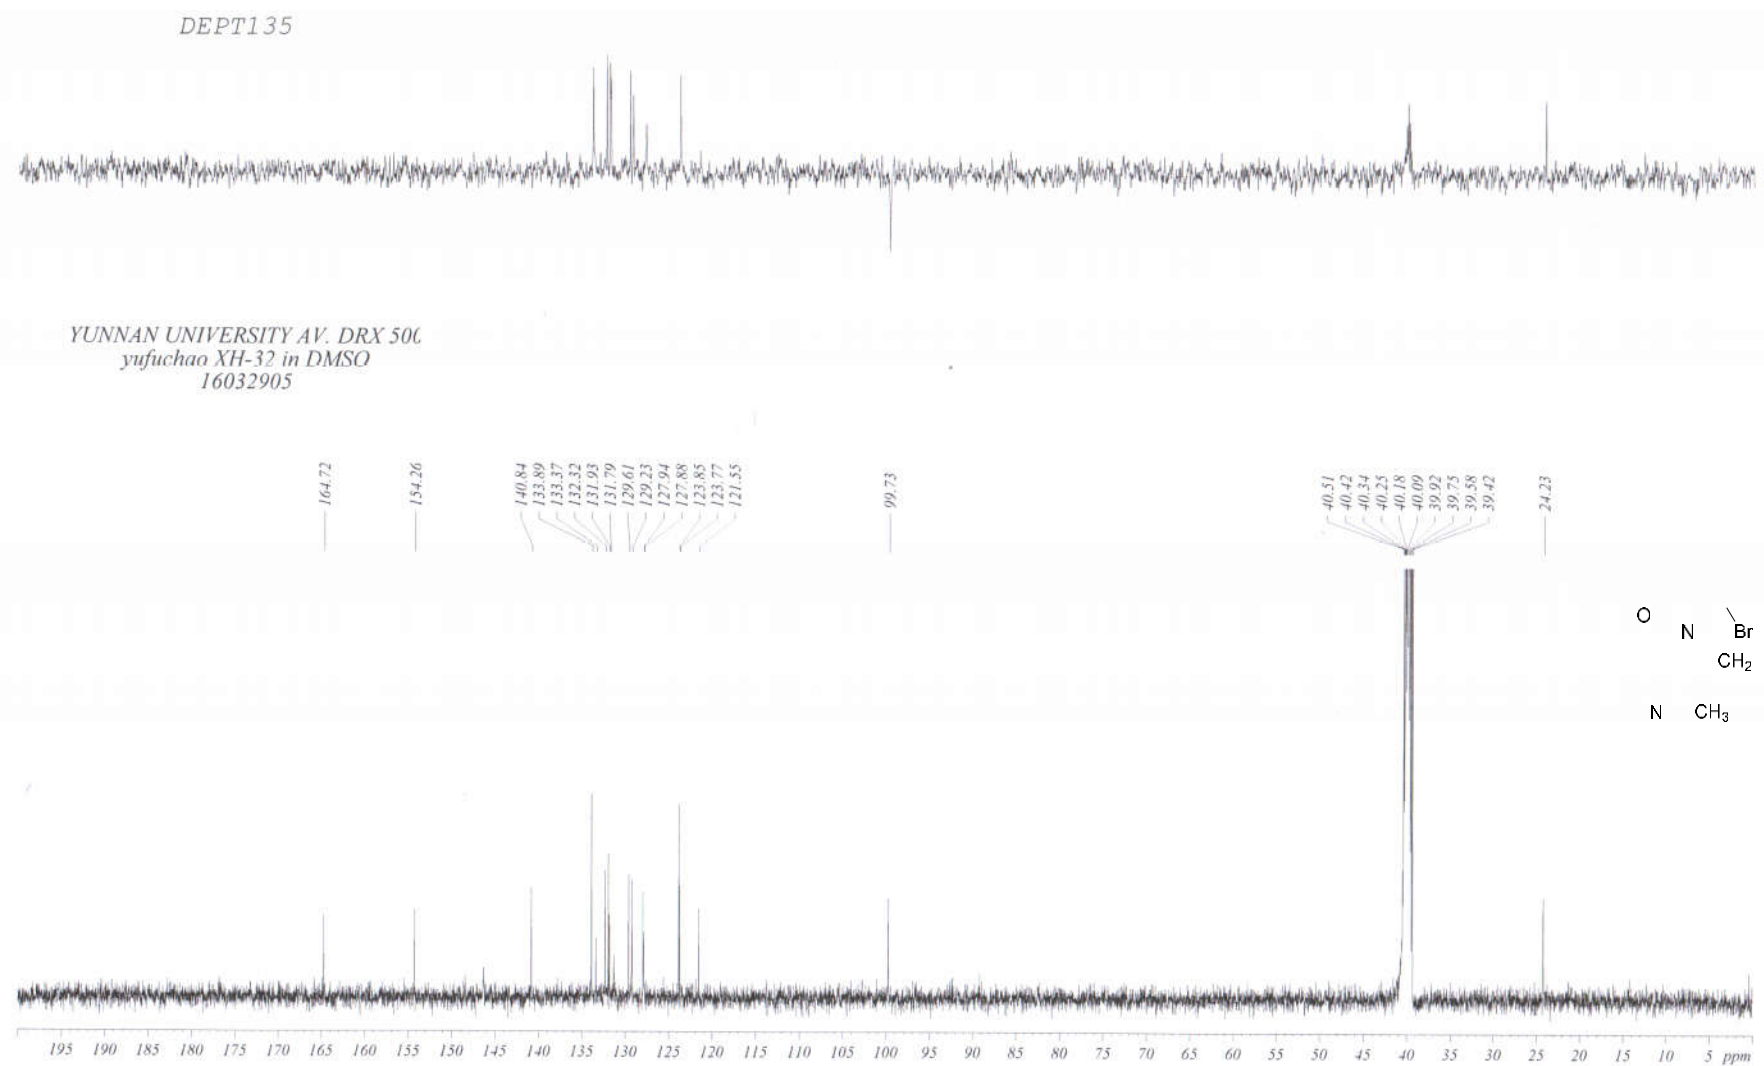

**Figure 8.**  $^{13}\text{C}$  NMR (125 MHz,  $\text{DMSO-}d_6$ ) spectra of compound **6d**

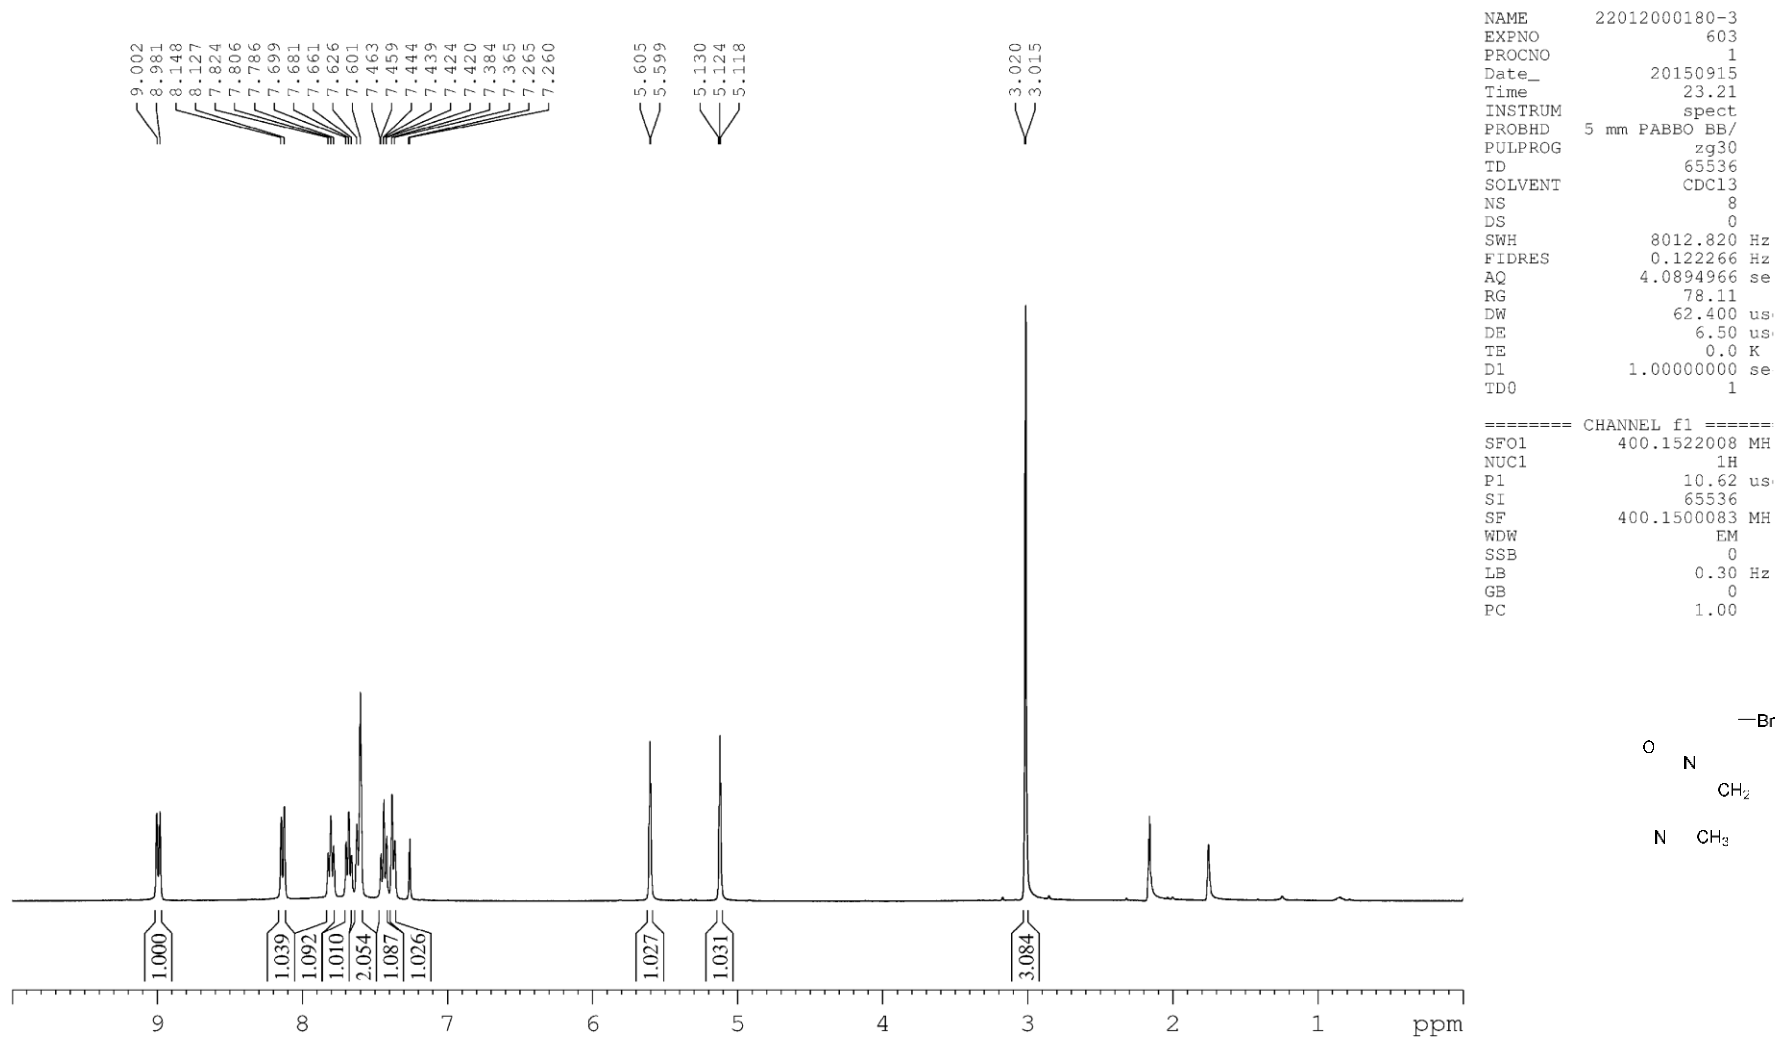

**Figure 9.** <sup>1</sup>H NMR (400 MHz, CDCl<sub>3</sub>) spectra of compound **6e**

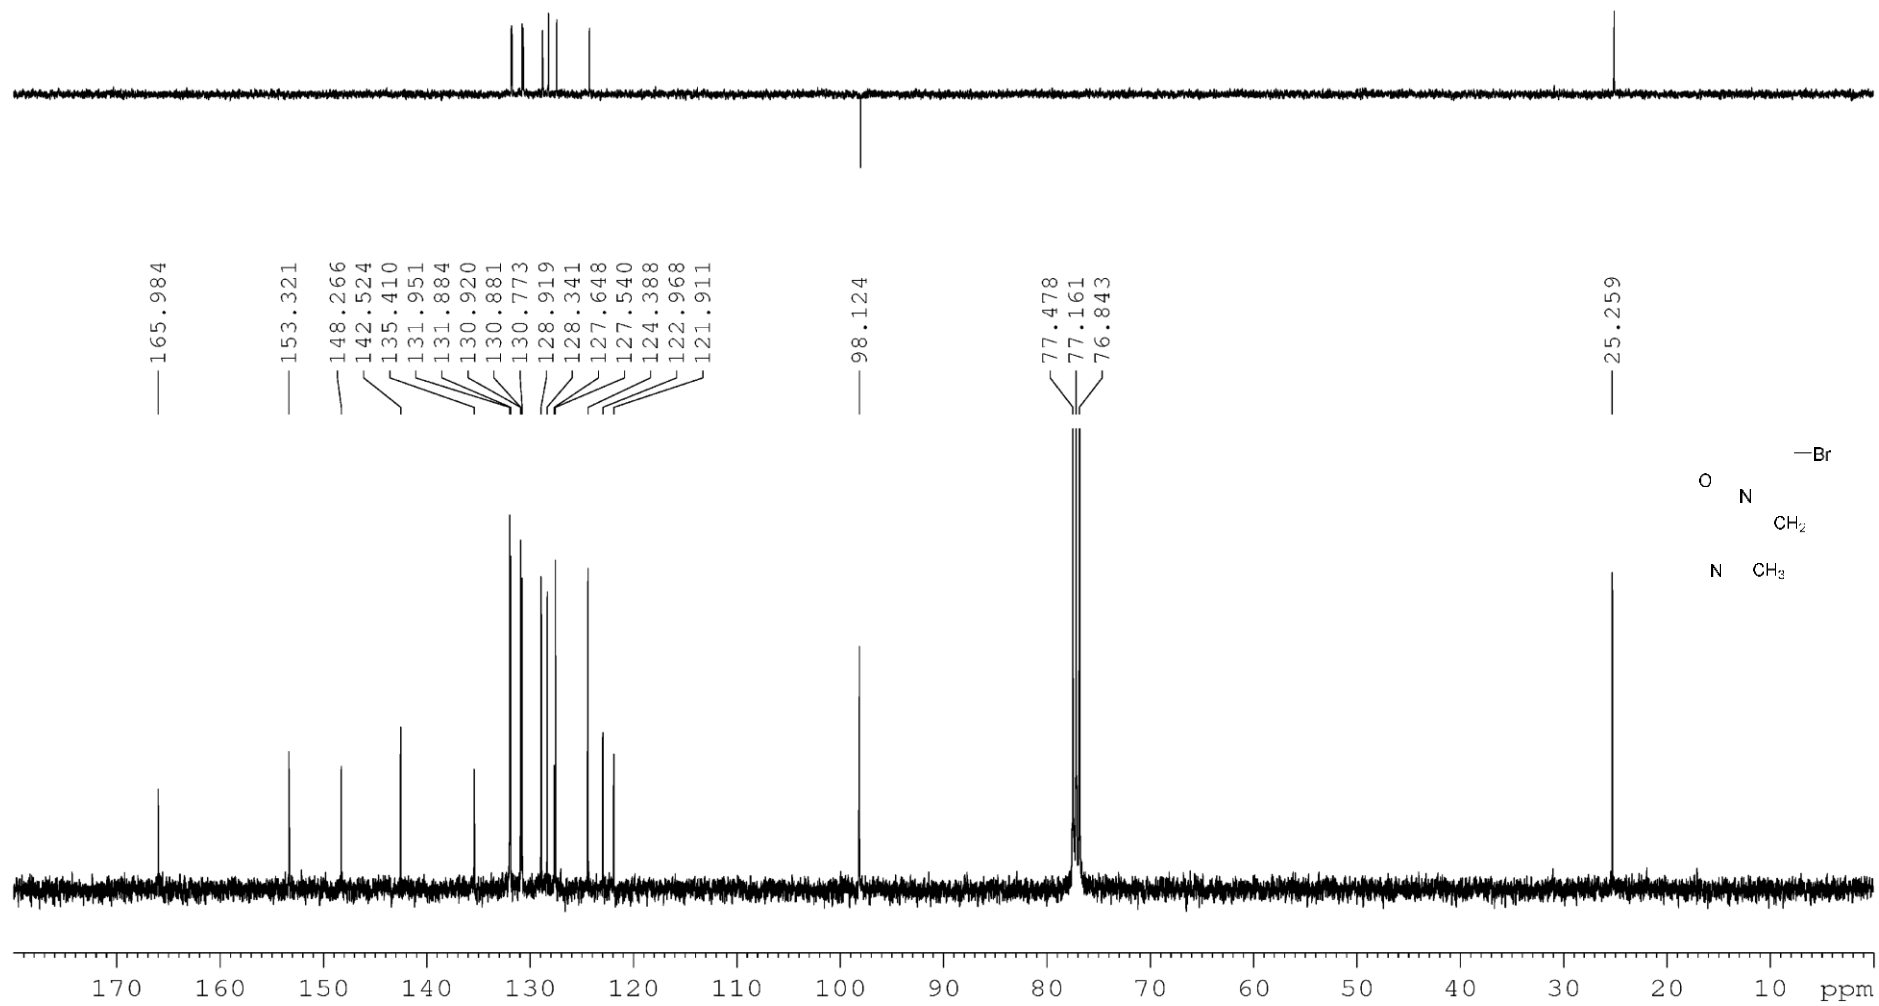

Figure 10. <sup>13</sup>C NMR (100 MHz, CDCl<sub>3</sub>) spectra of compound **6e**

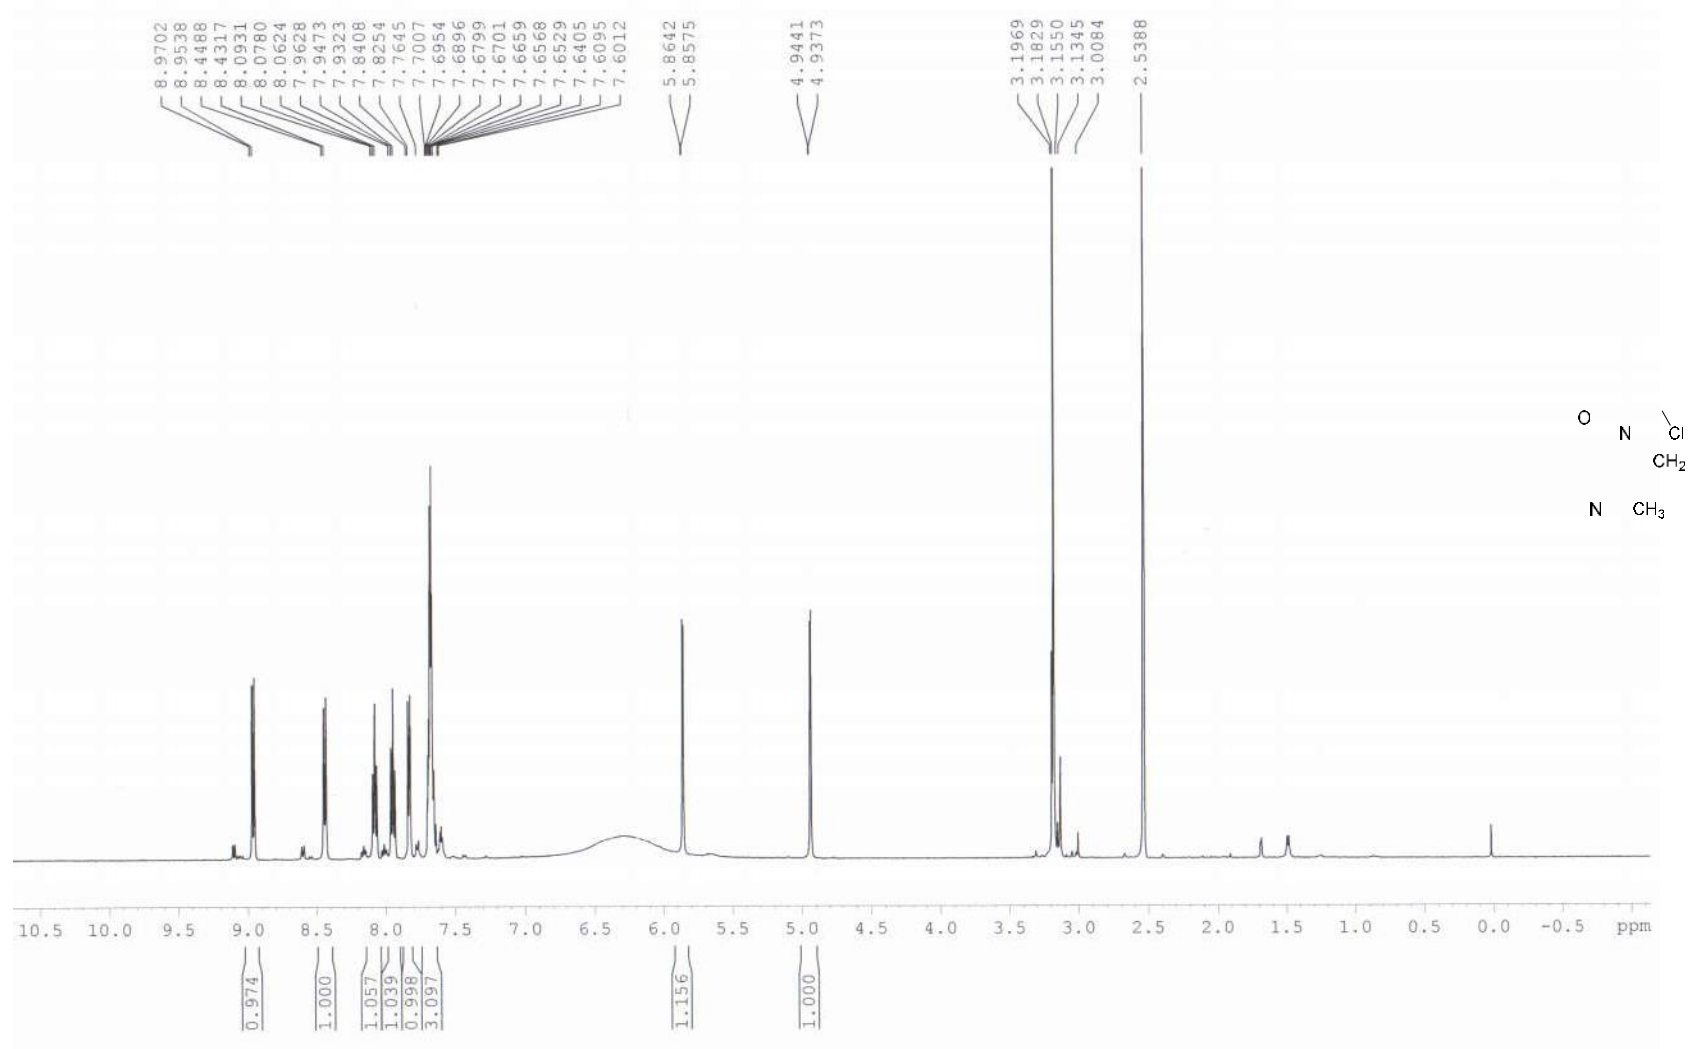

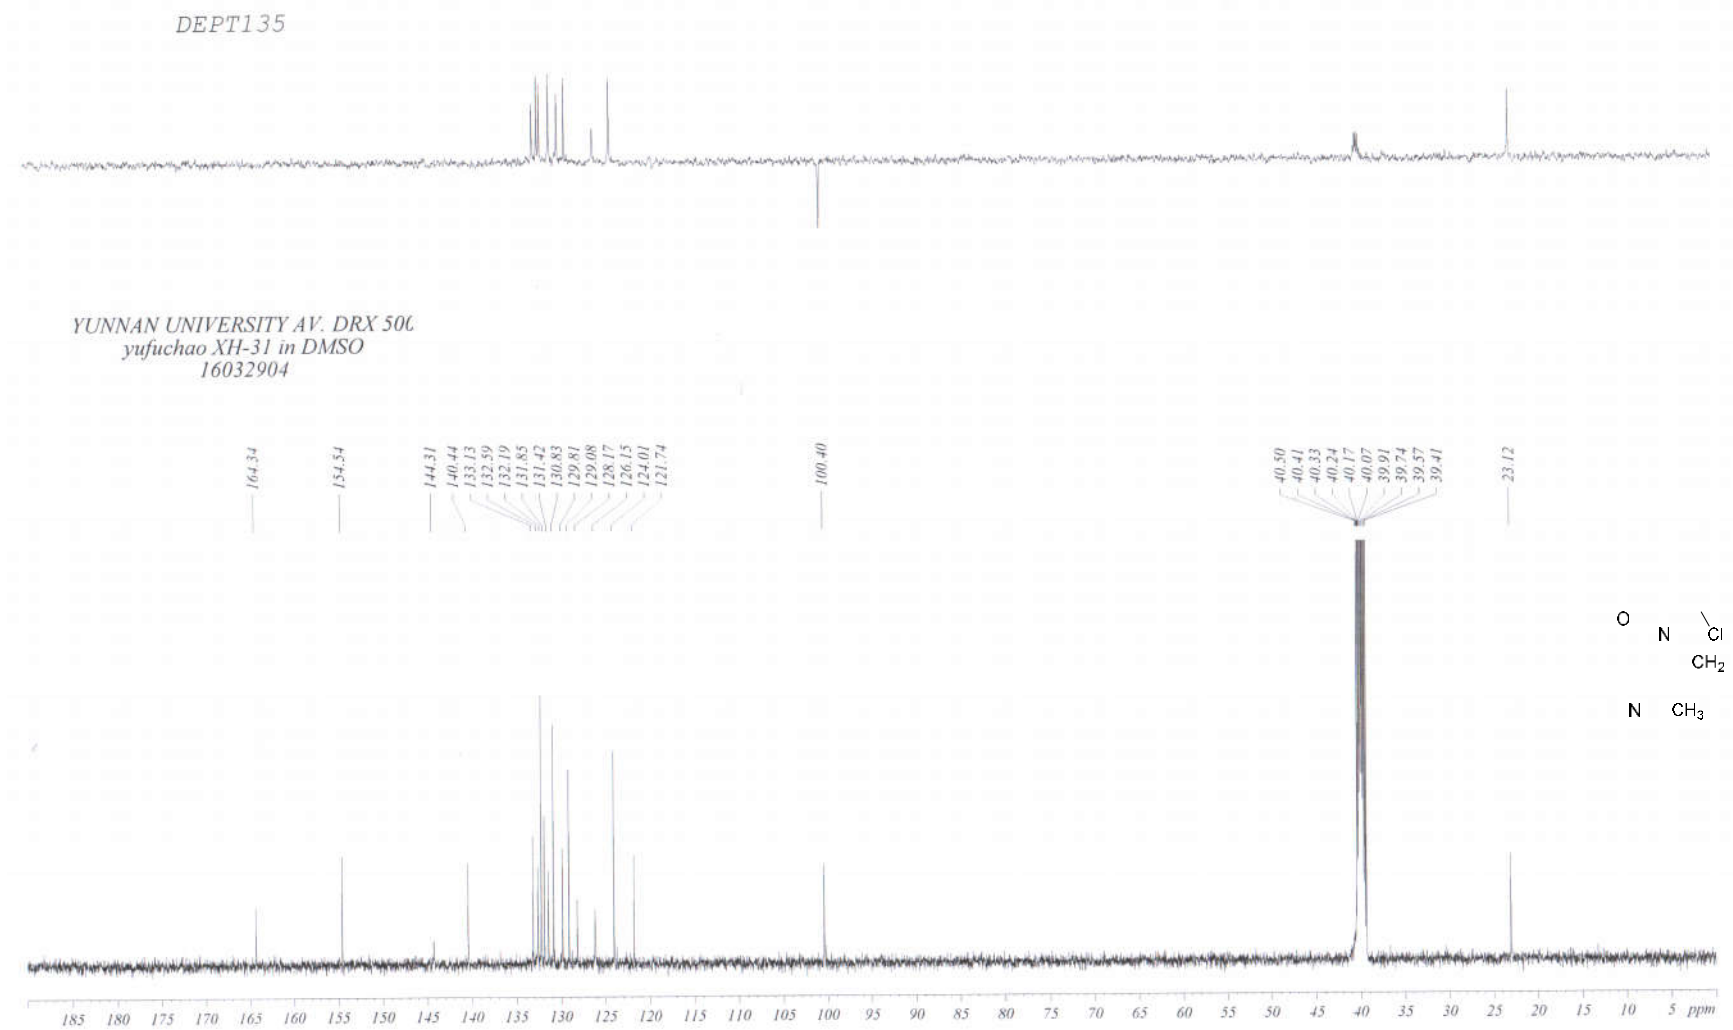

**Figure 12.**  $^{13}\text{C}$  NMR (125 MHz,  $\text{DMSO-}d_6$ ) spectra of compound **6f**

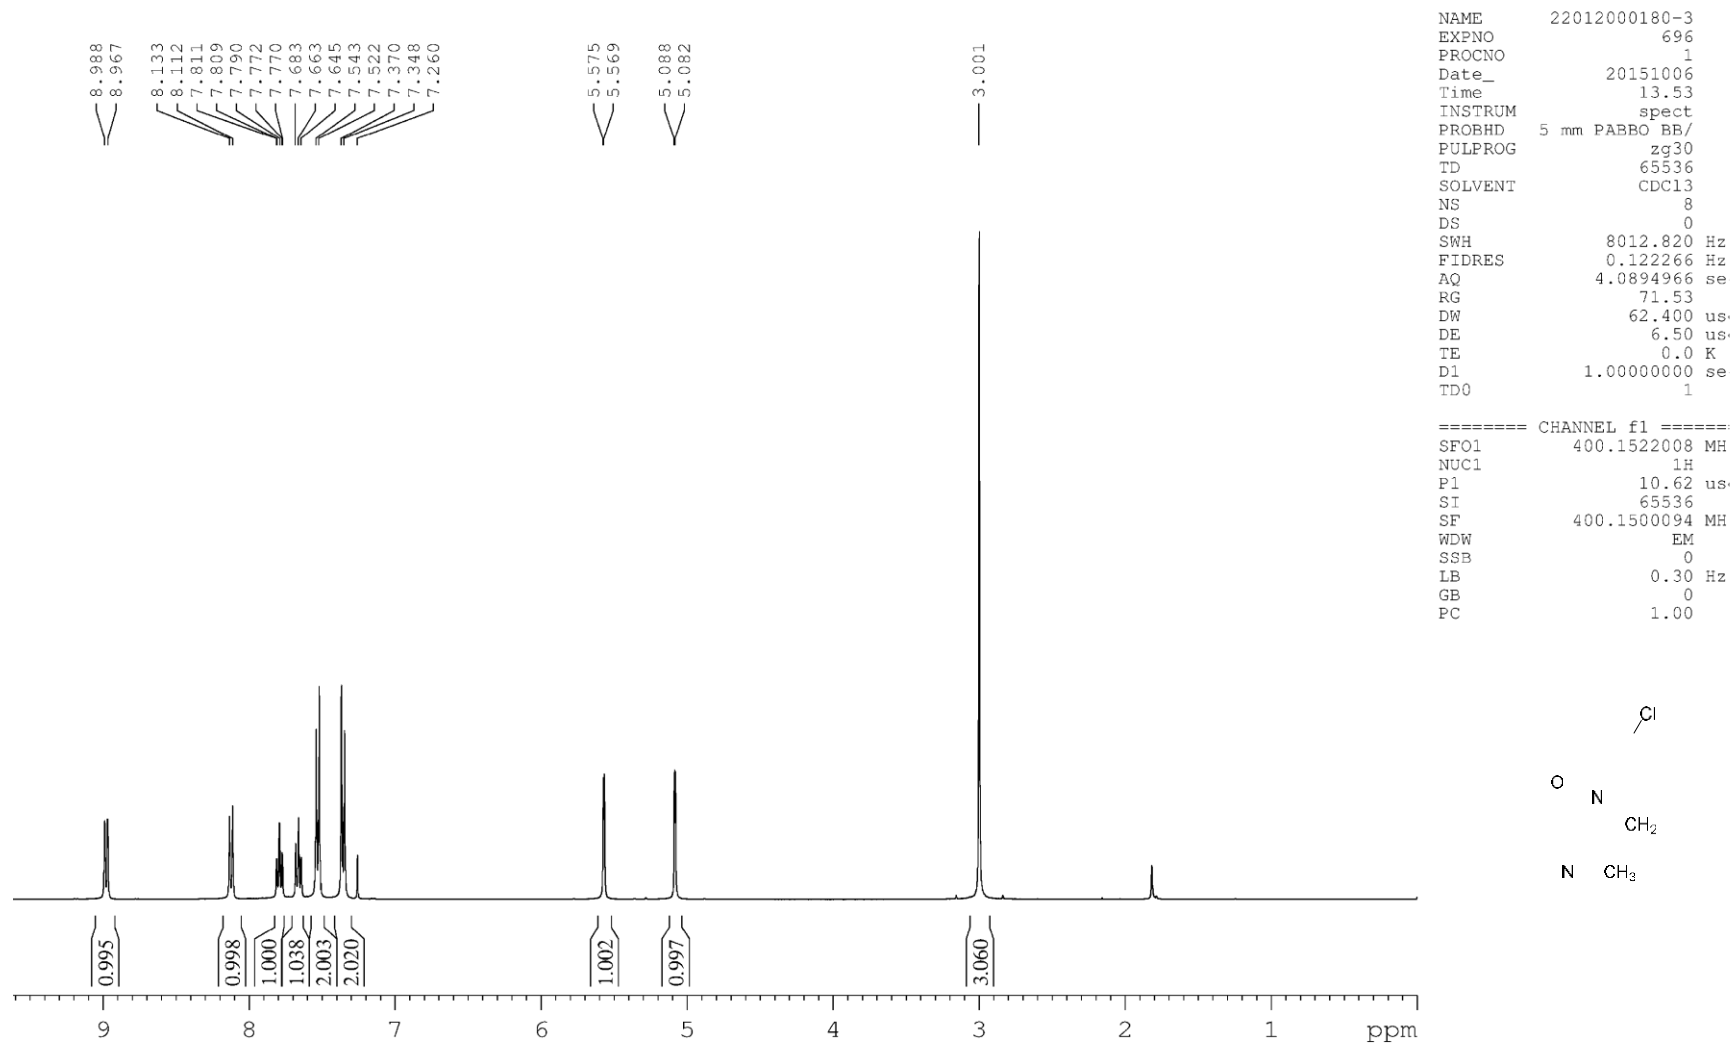

Figure 13. <sup>1</sup>H NMR (400 MHz, CDCl<sub>3</sub>) spectra of compound **6g**

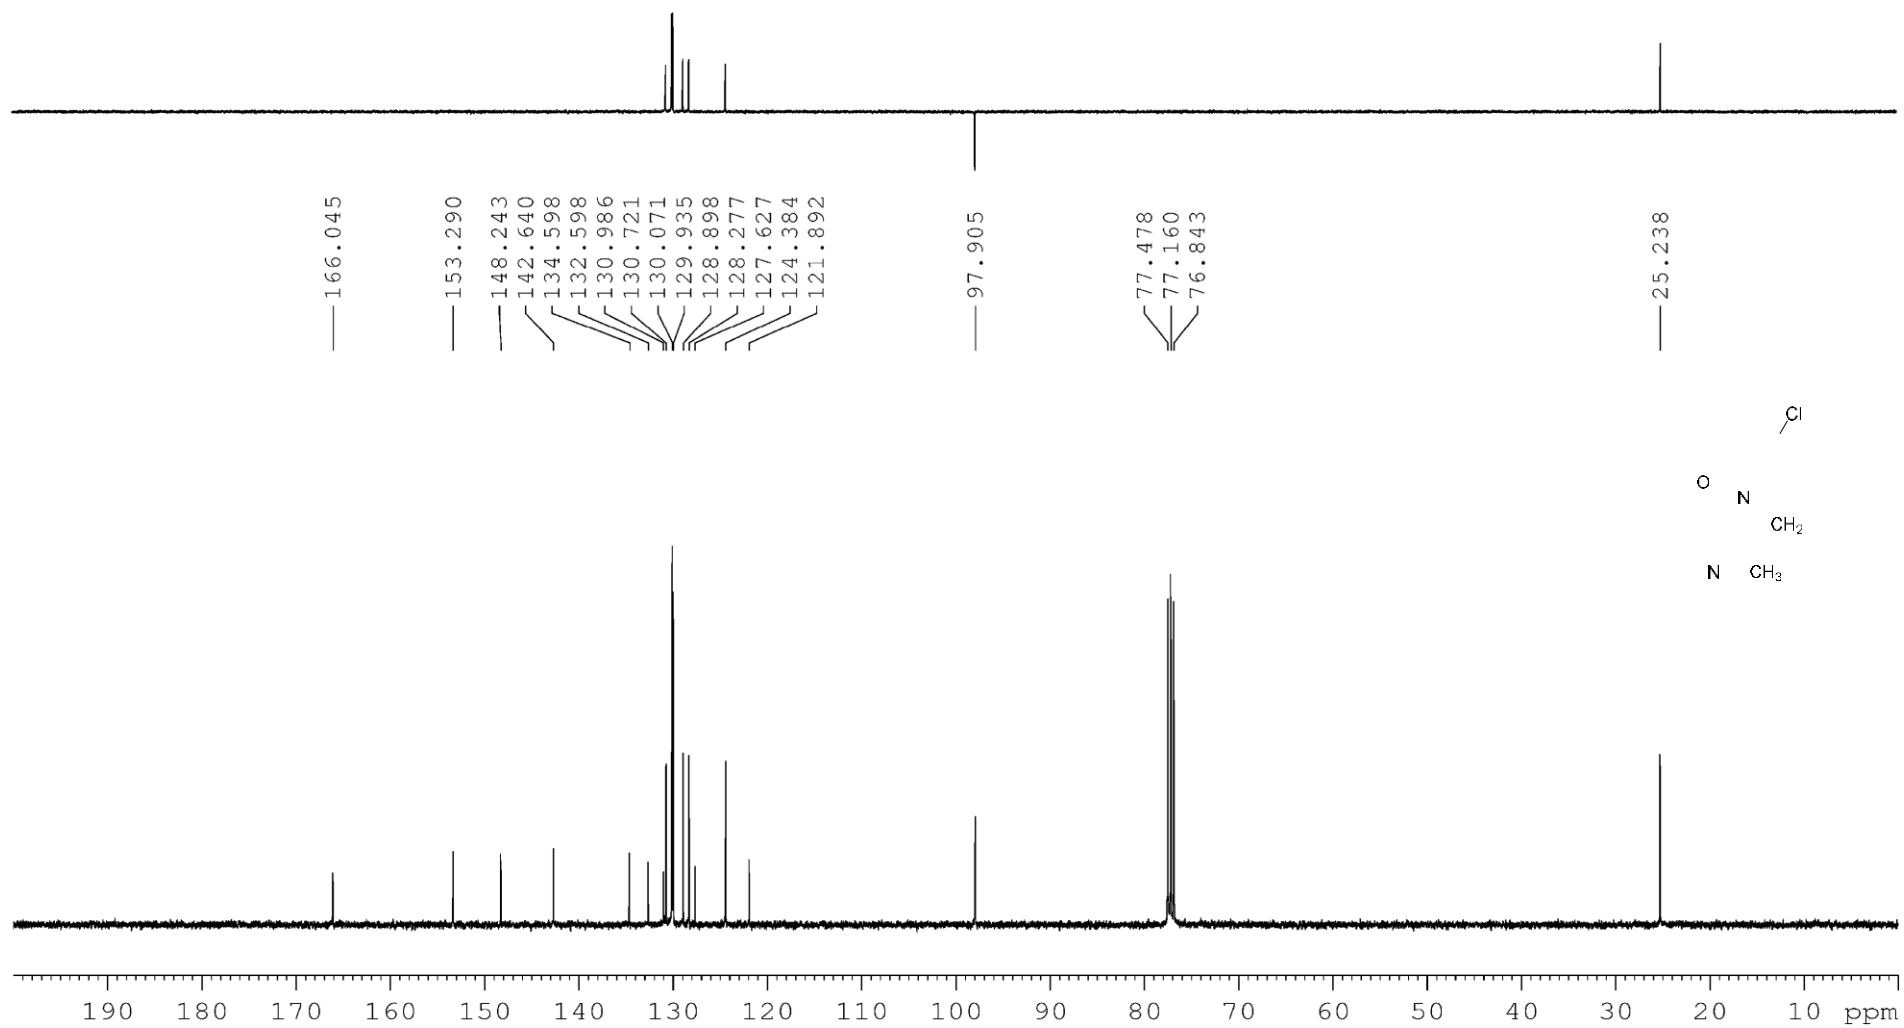

**Figure 14.**  $^{13}\text{C}$  NMR (100 MHz,  $\text{CDCl}_3$ ) spectra of compound **6g**



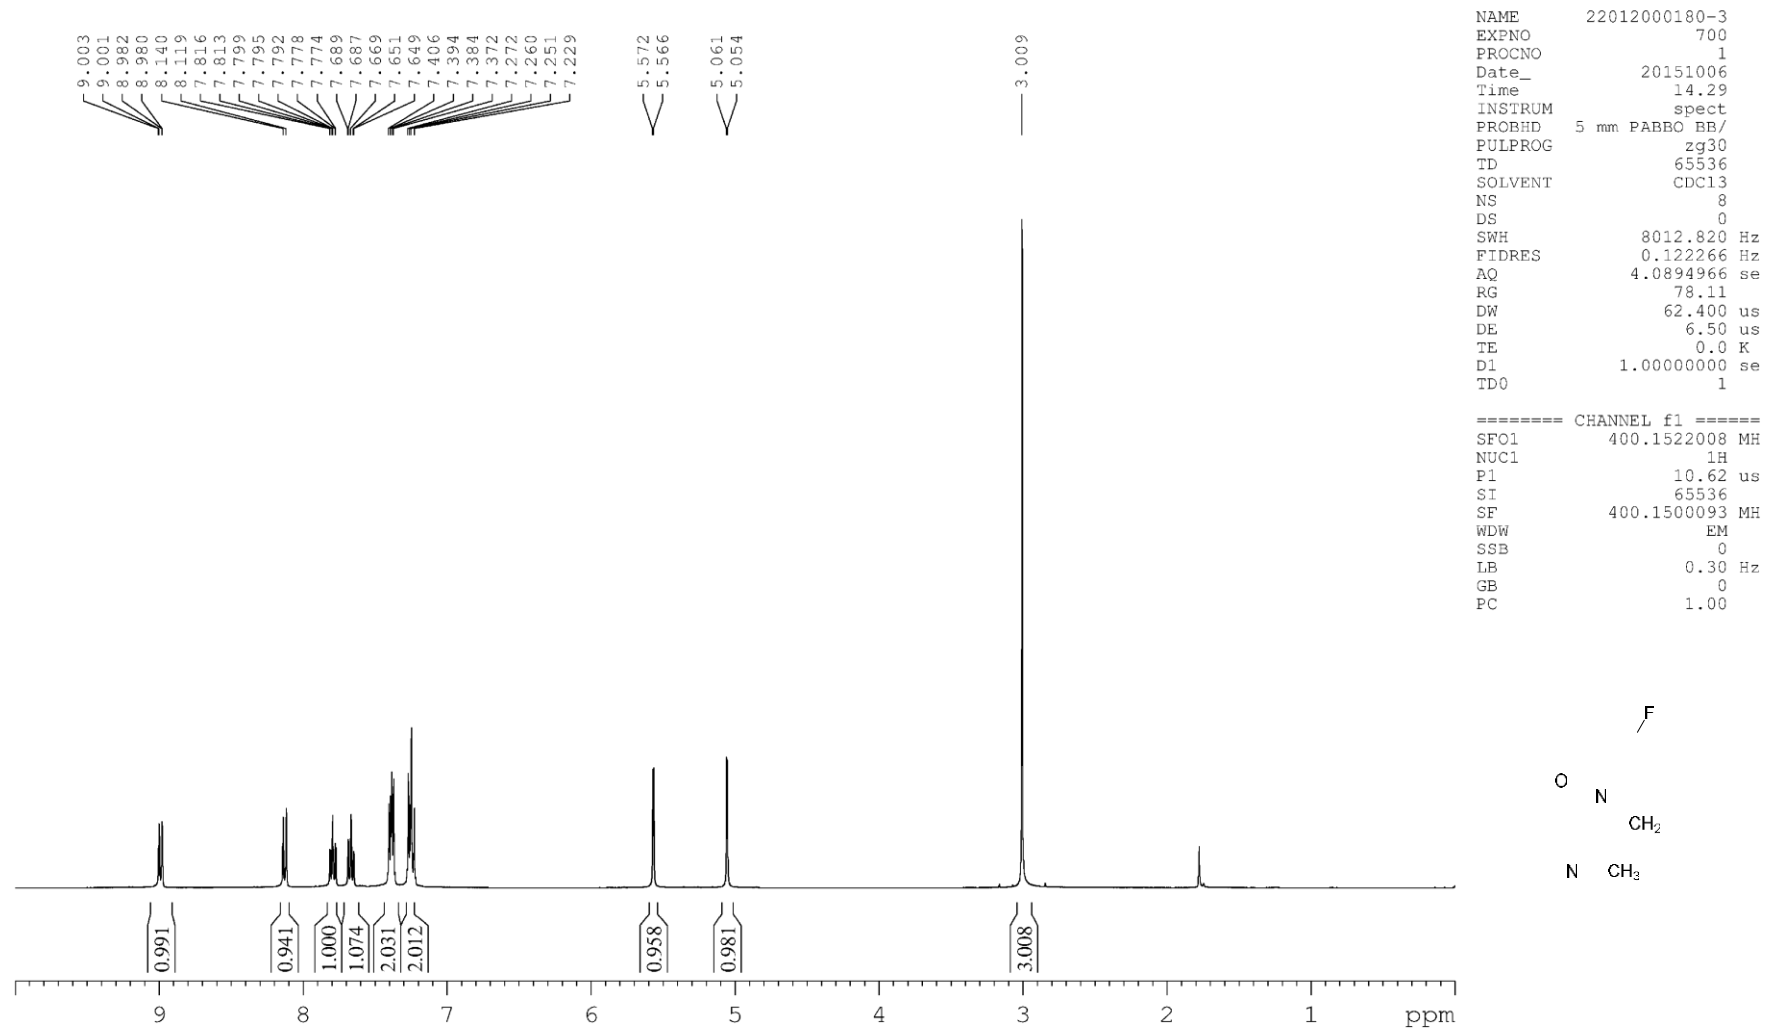

Figure 15. <sup>1</sup>H NMR (400 MHz, CDCl<sub>3</sub>) spectra of compound **6h**

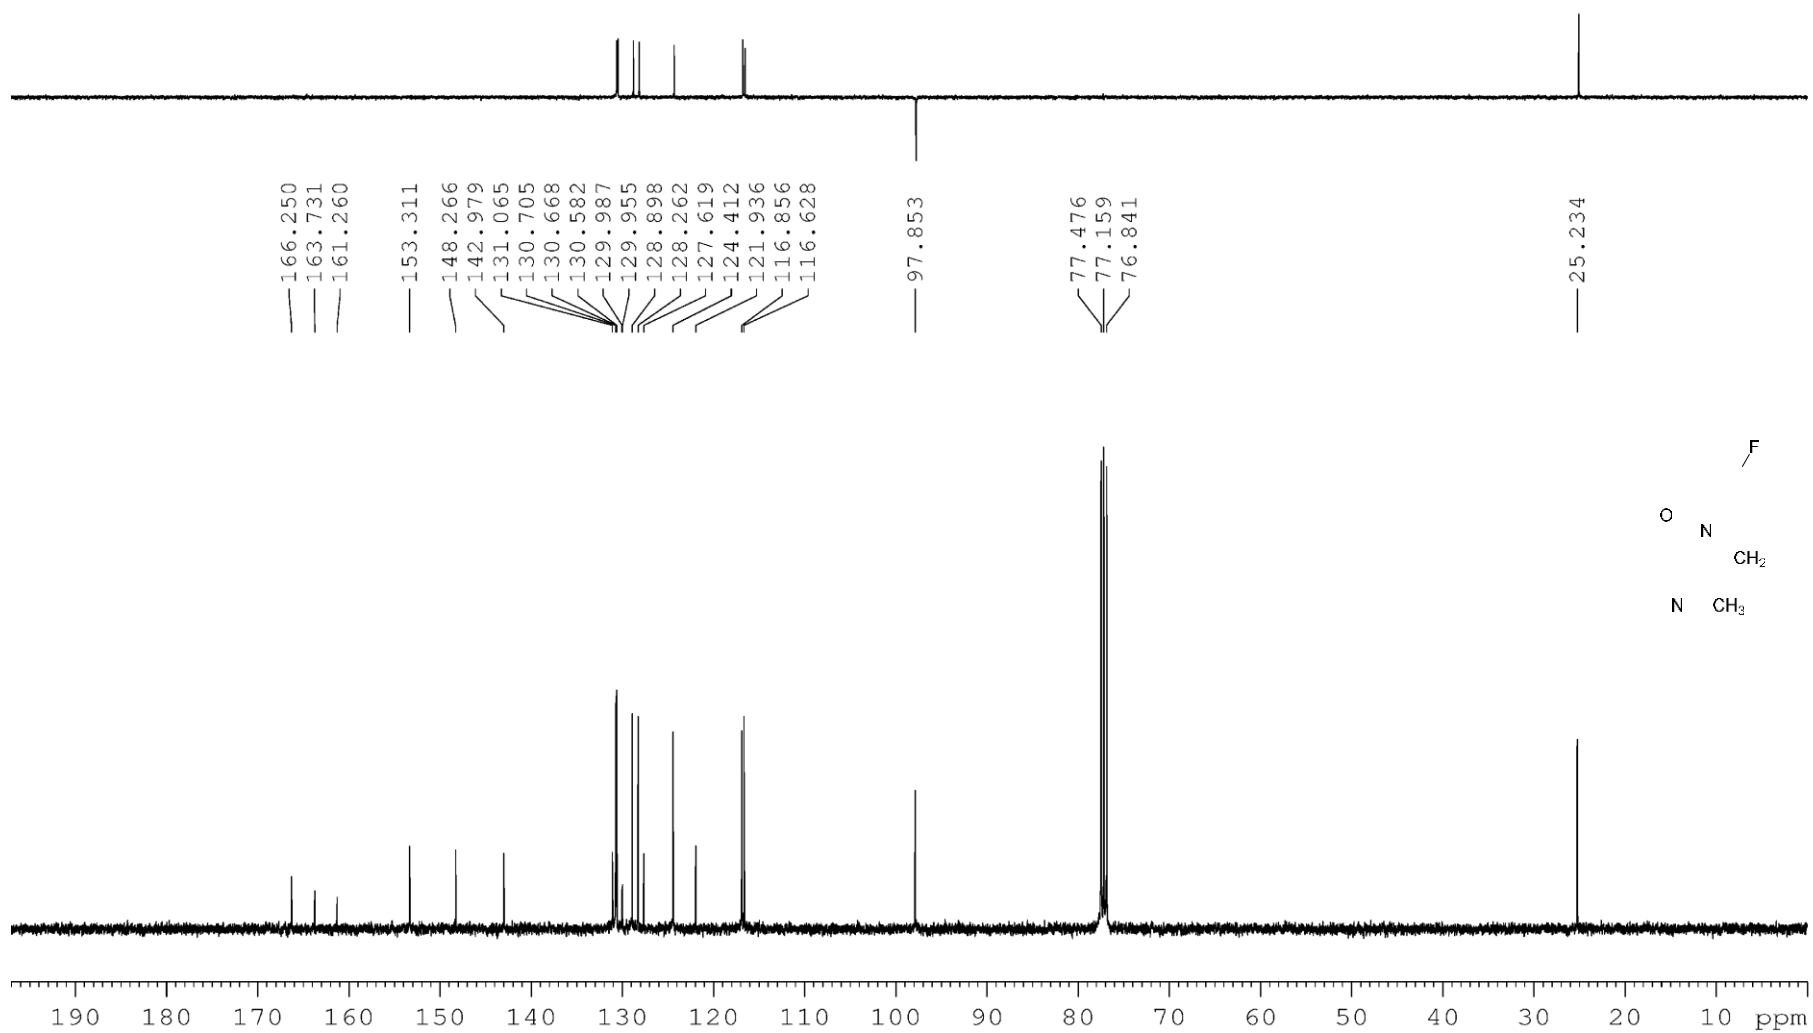

Figure 16. <sup>13</sup>C NMR (100 MHz, CDCl<sub>3</sub>) spectra of compound **6h**

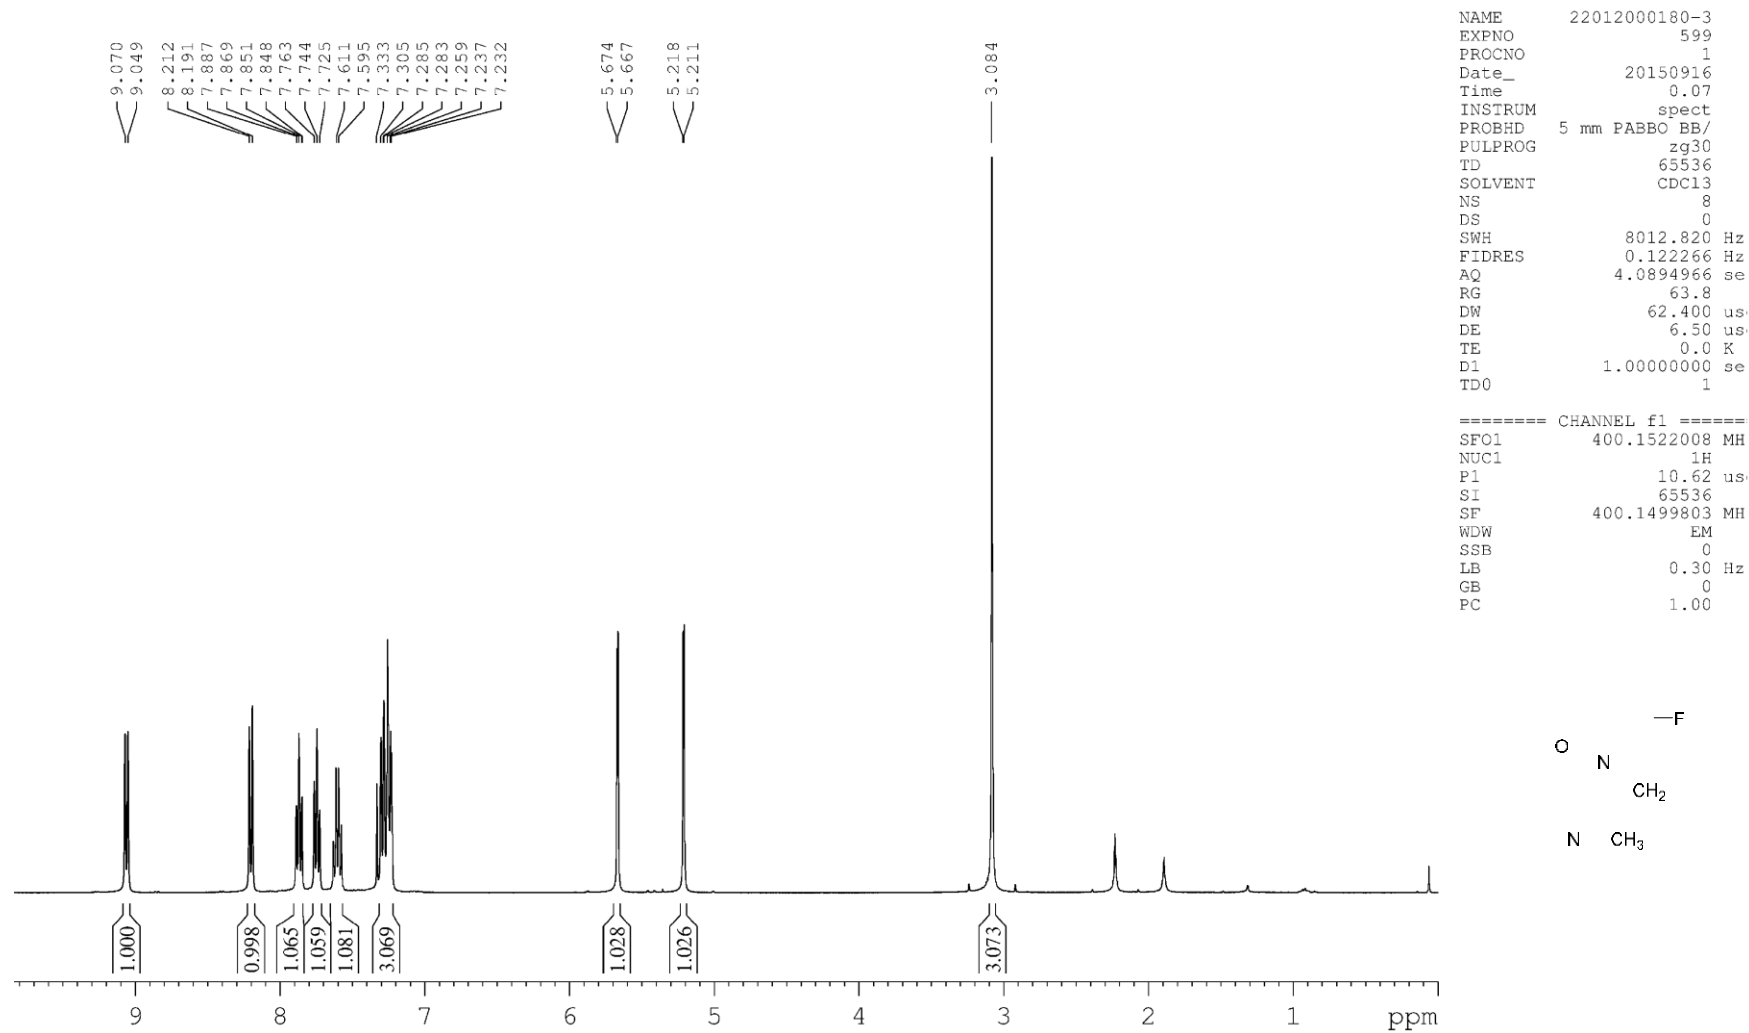

Figure 17. <sup>1</sup>H NMR (400 MHz, CDCl<sub>3</sub>) spectra of compound **6i**

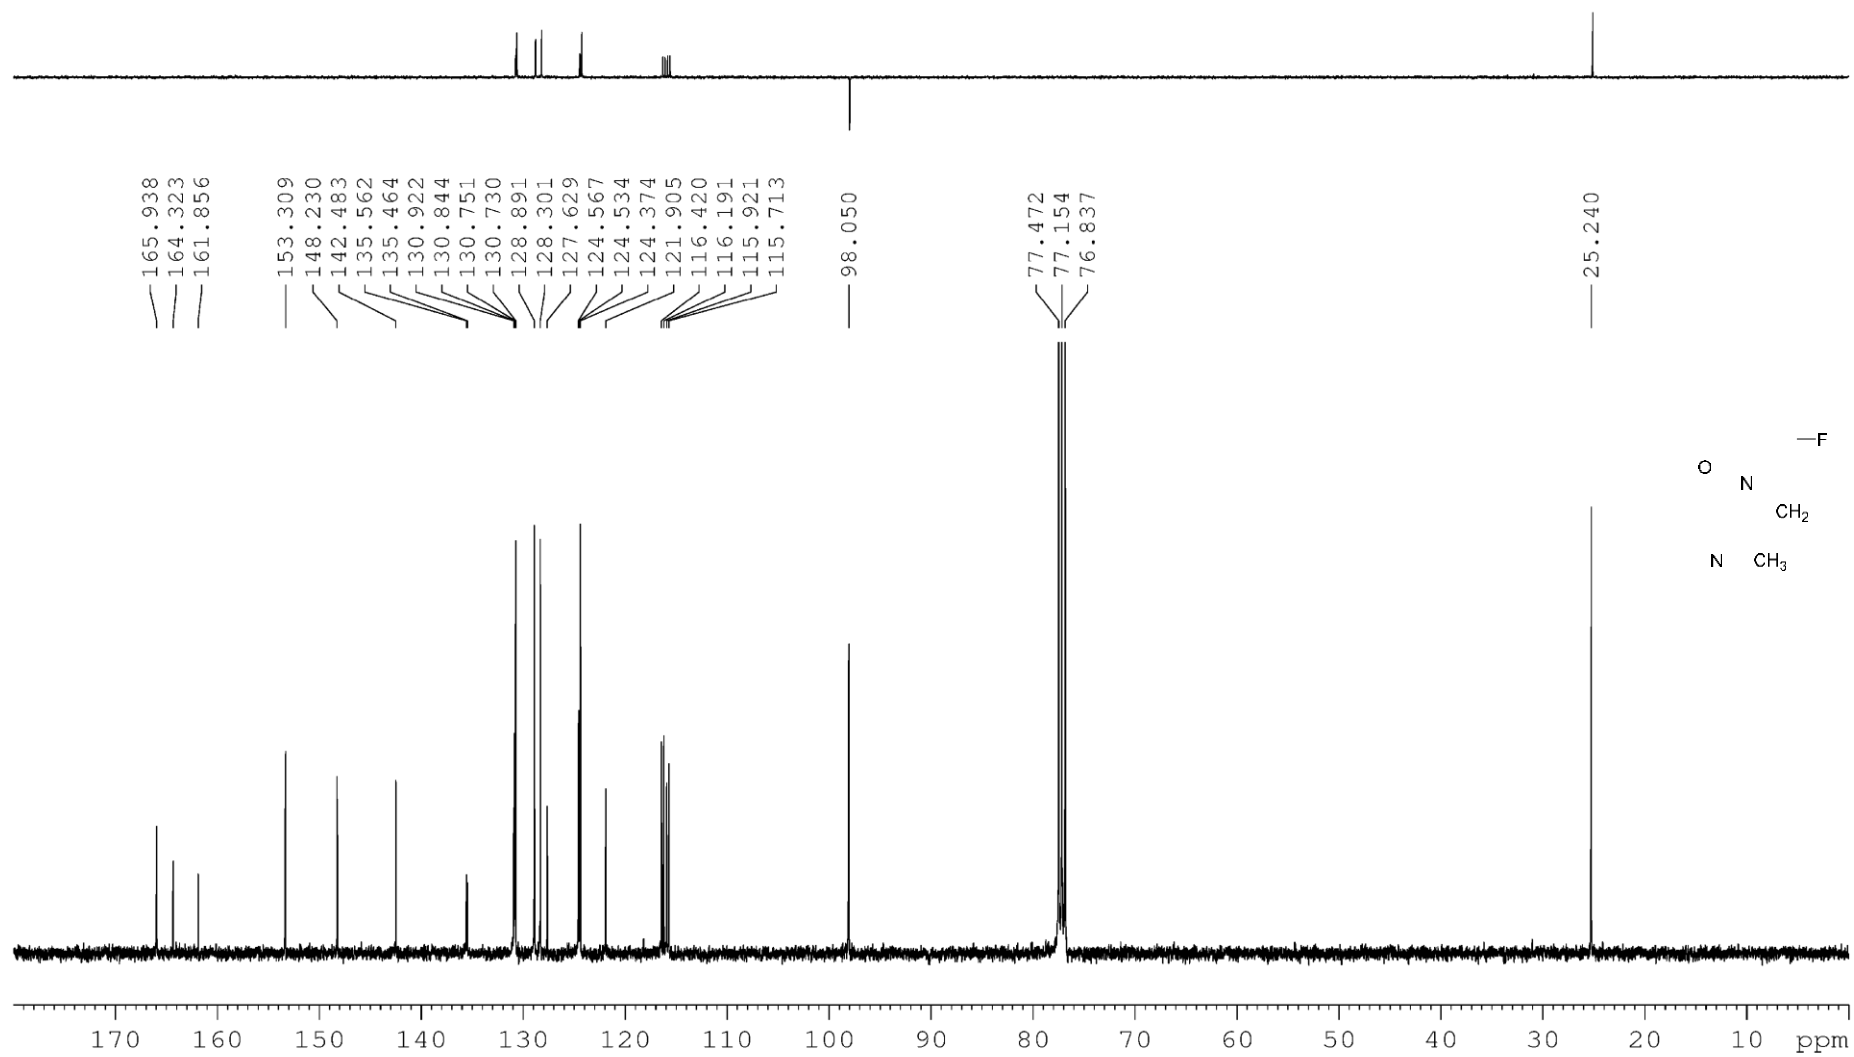

**Figure 18.**  $^{13}\text{C}$  NMR (100 MHz,  $\text{CDCl}_3$ ) spectra of compound **6i**

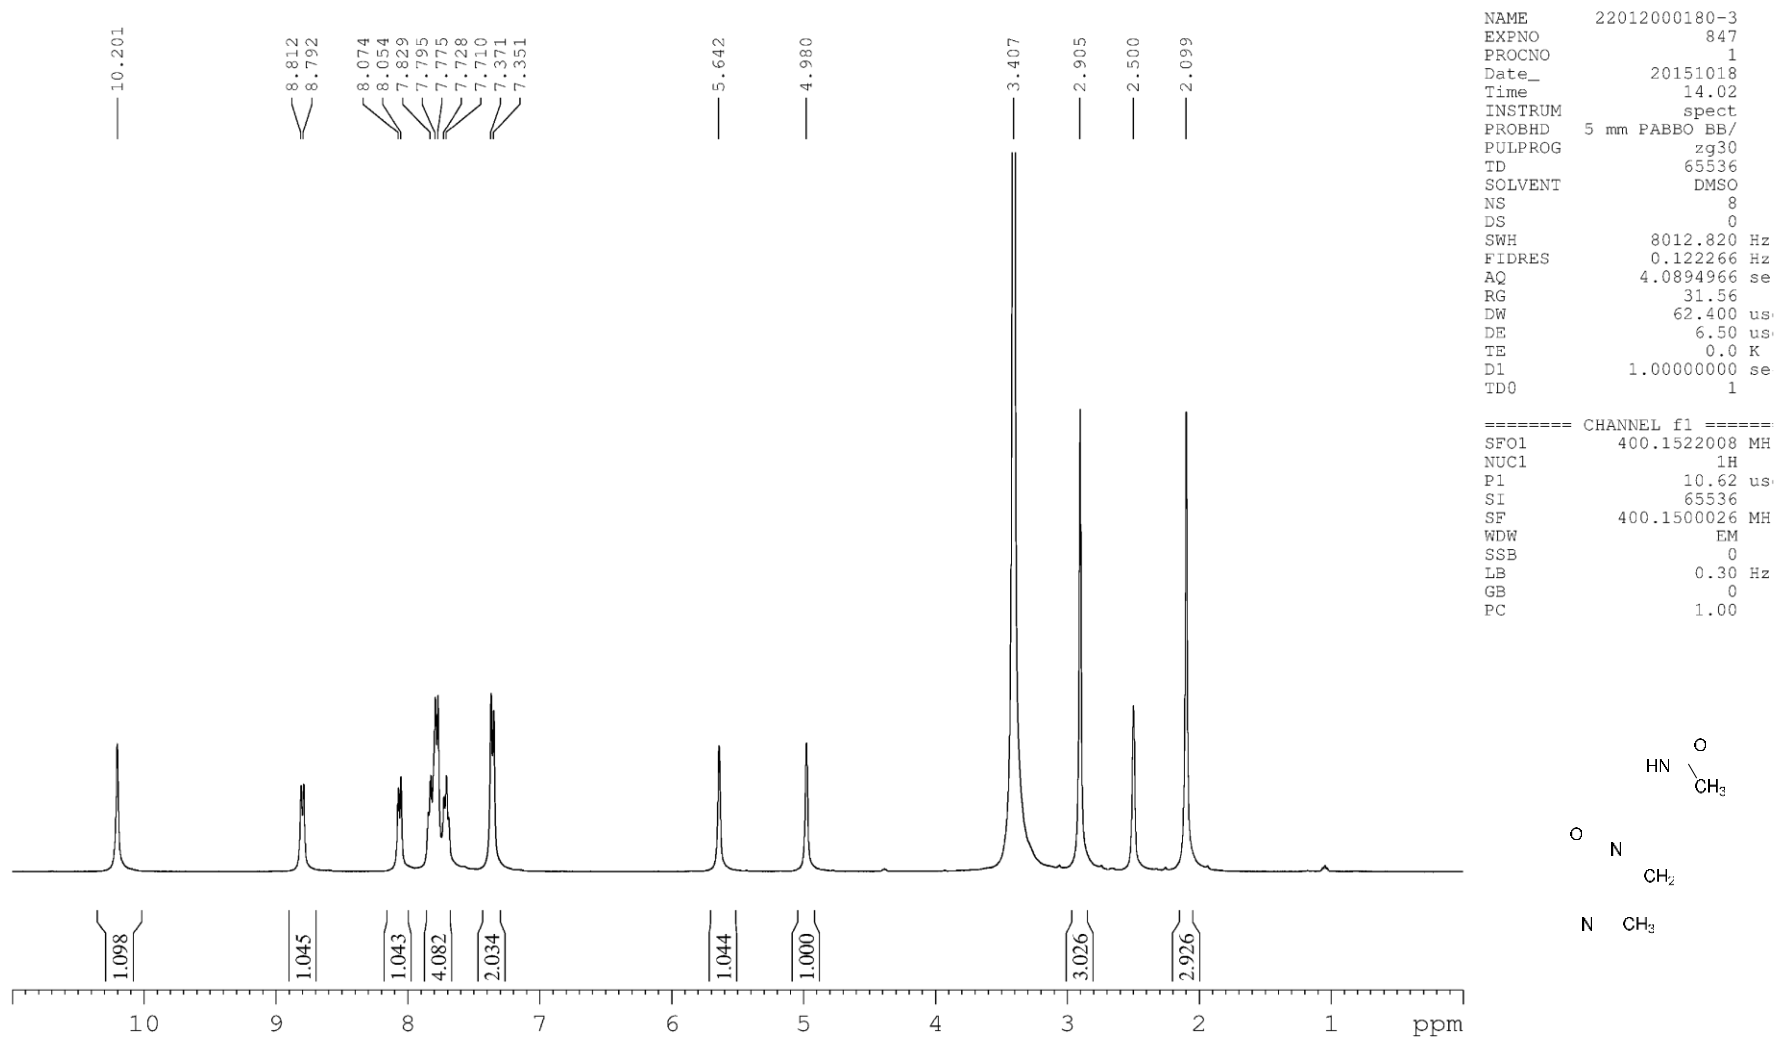

Figure 19. <sup>1</sup>H NMR (400 MHz, DMSO-*d*<sub>6</sub>) spectra of compound **6j**

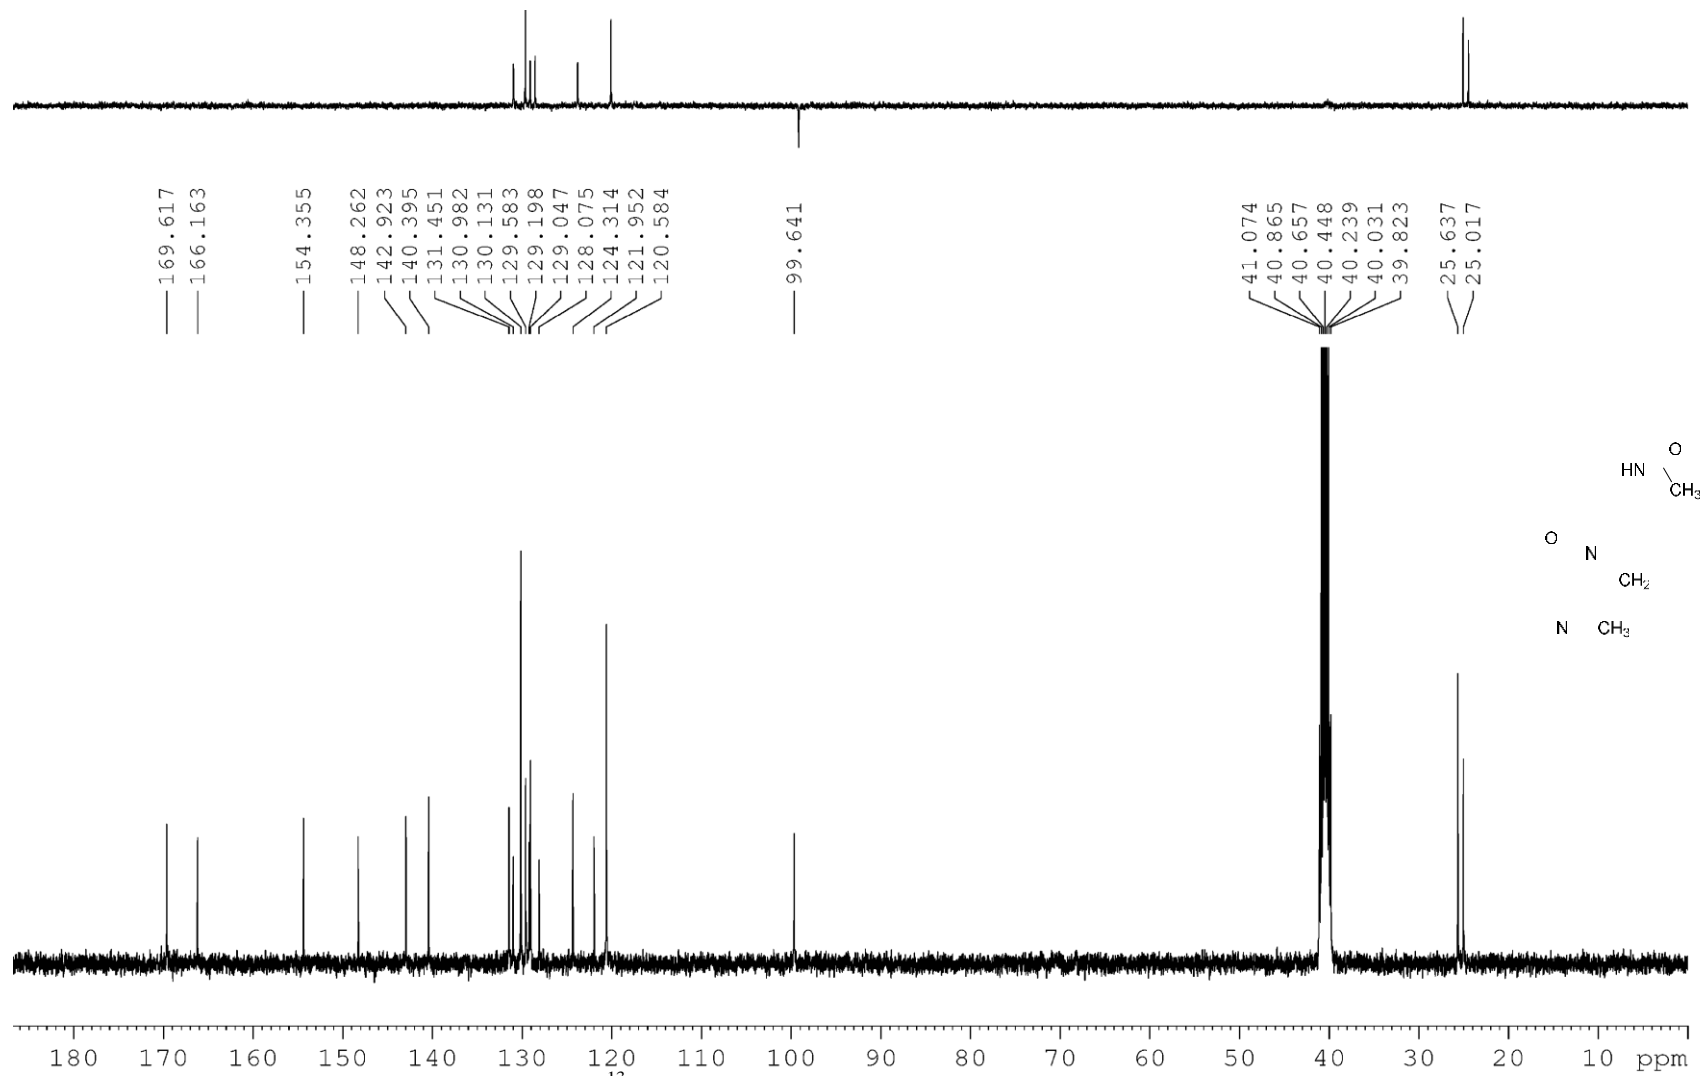

Figure 20.  $^{13}\text{C}$  NMR (100 MHz,  $\text{DMSO-}d_6$ ) spectra of compound 6j

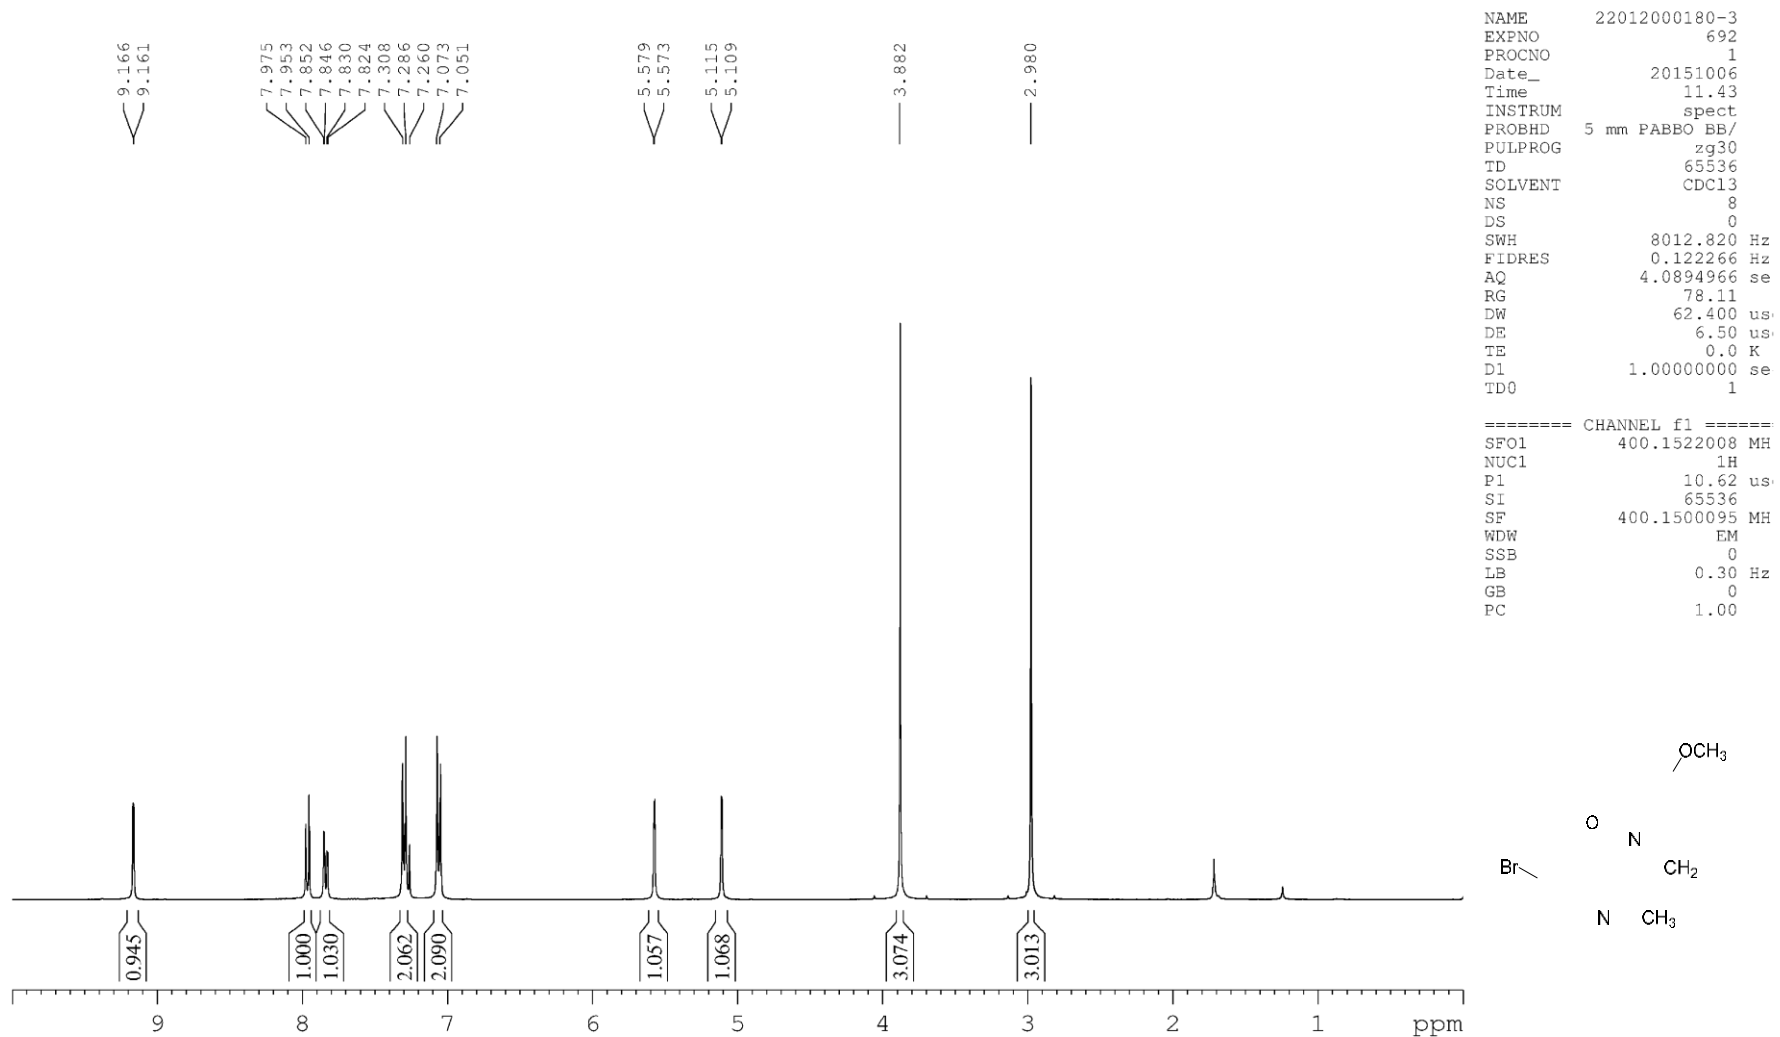

Figure 21. <sup>1</sup>H NMR (400 MHz, CDCl<sub>3</sub>) spectra of compound **6k**

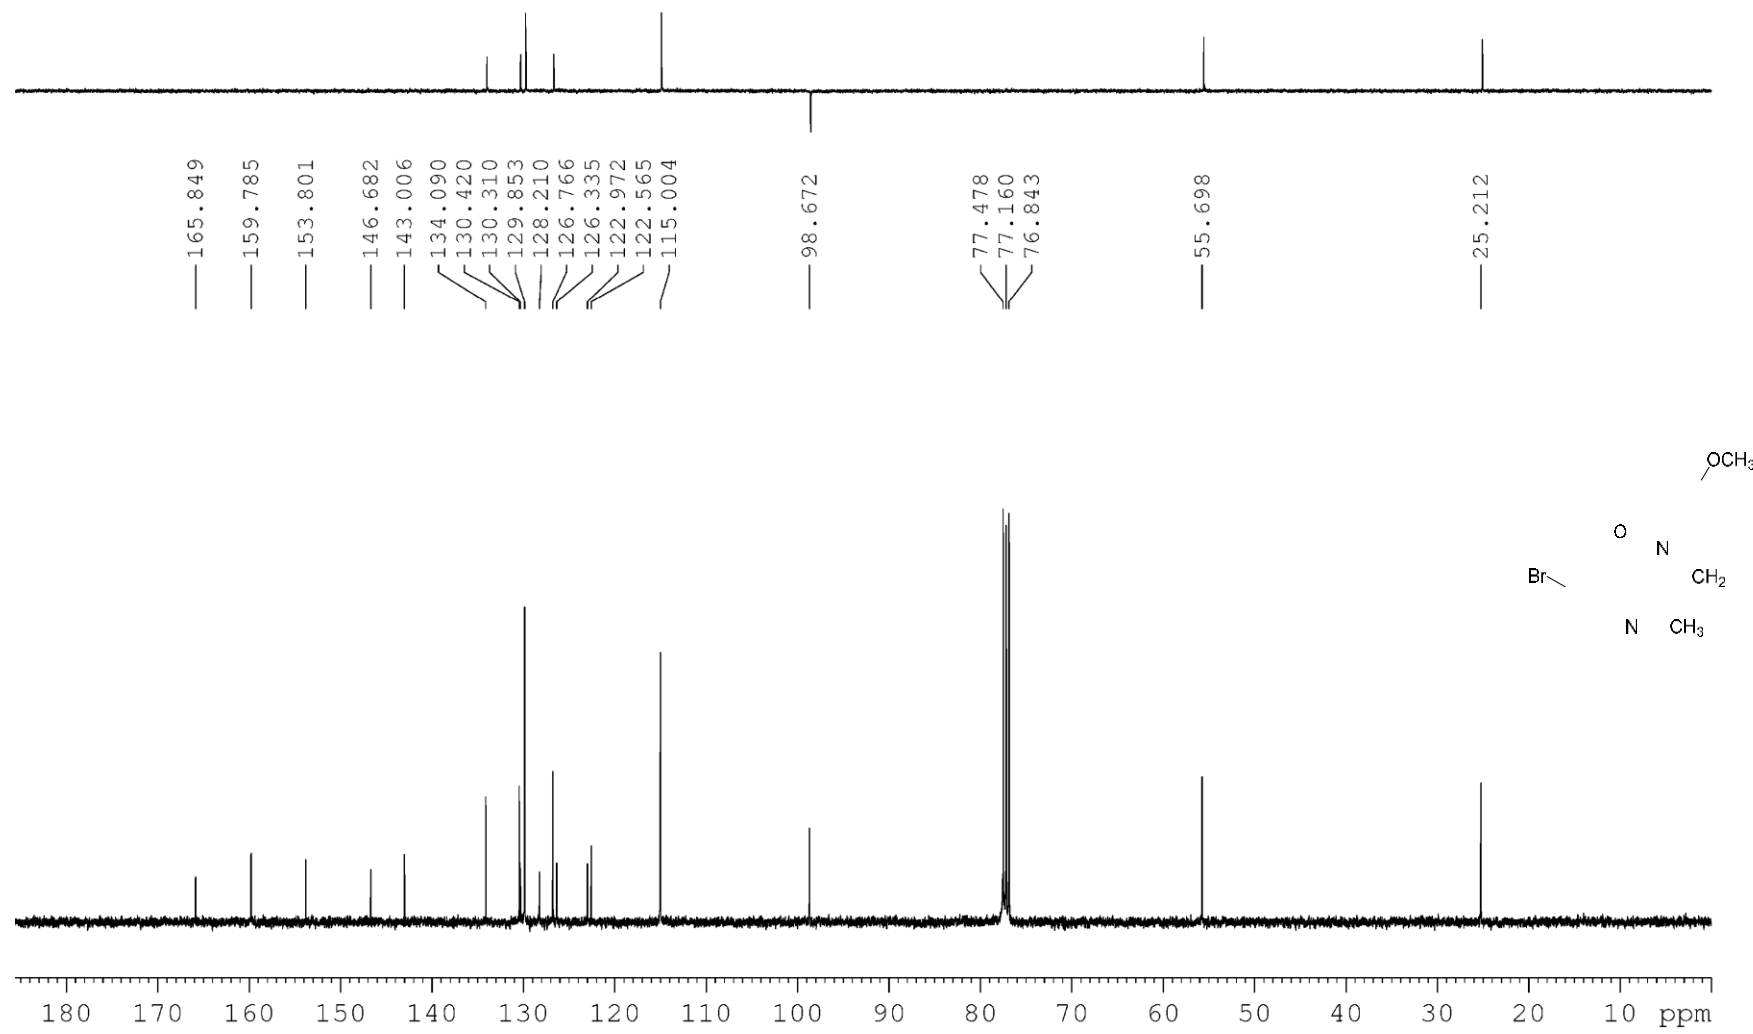

**Figure 22.**  $^{13}\text{C}$  NMR (100 MHz,  $\text{CDCl}_3$ ) spectra of compound **6k**



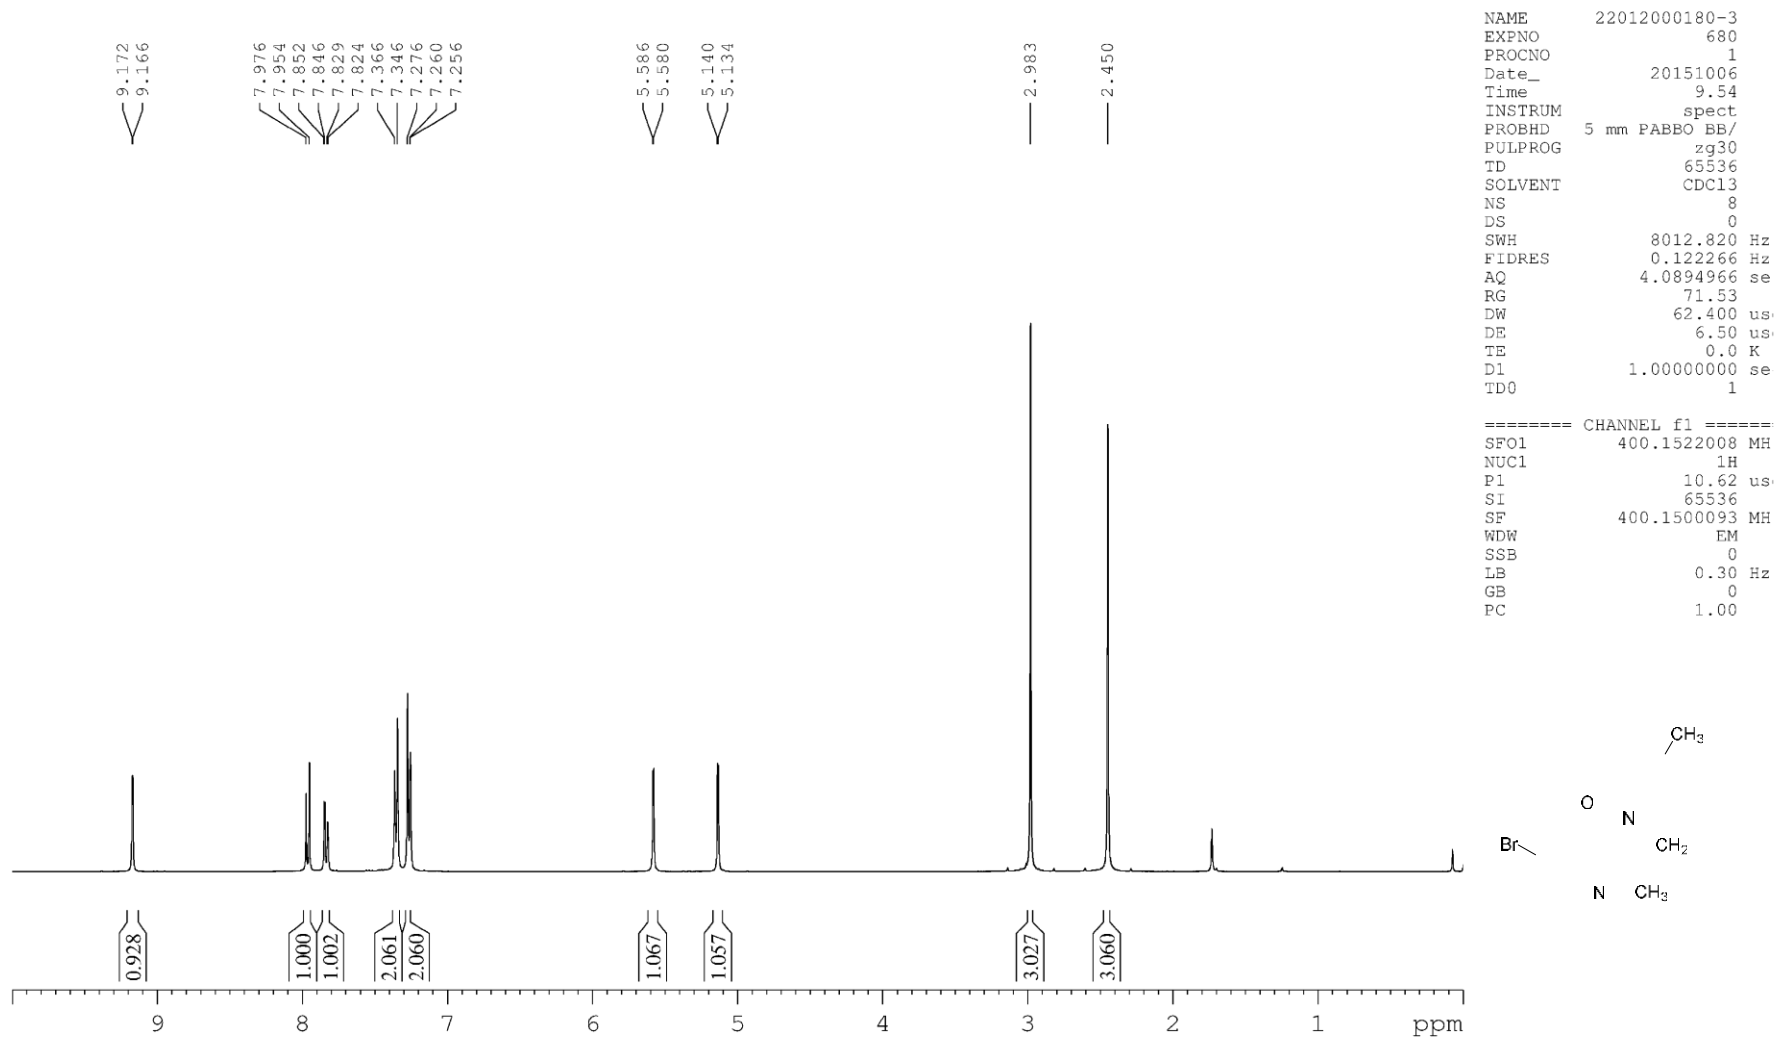

Figure 23. <sup>1</sup>H NMR (400 MHz, CDCl<sub>3</sub>) spectra of compound **6l**

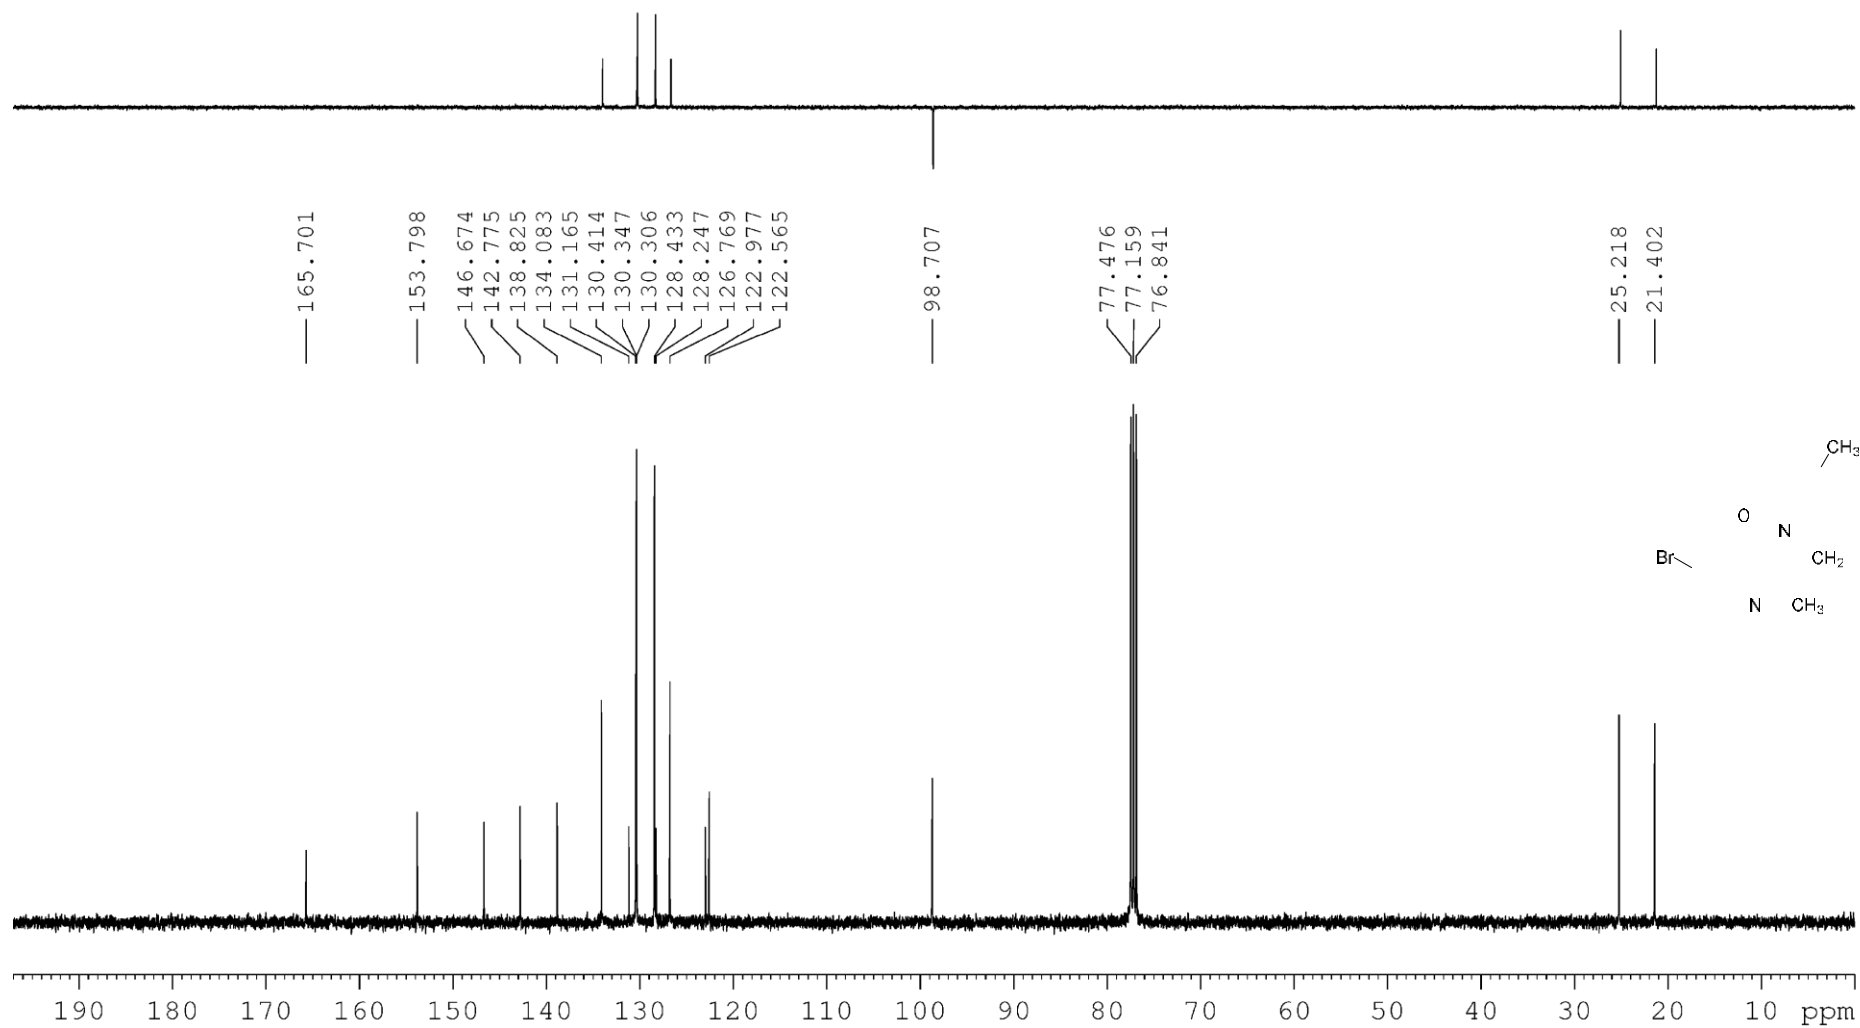

**Figure 24.** <sup>13</sup>C NMR (100 MHz, CDCl<sub>3</sub>) spectra of compound **6l**

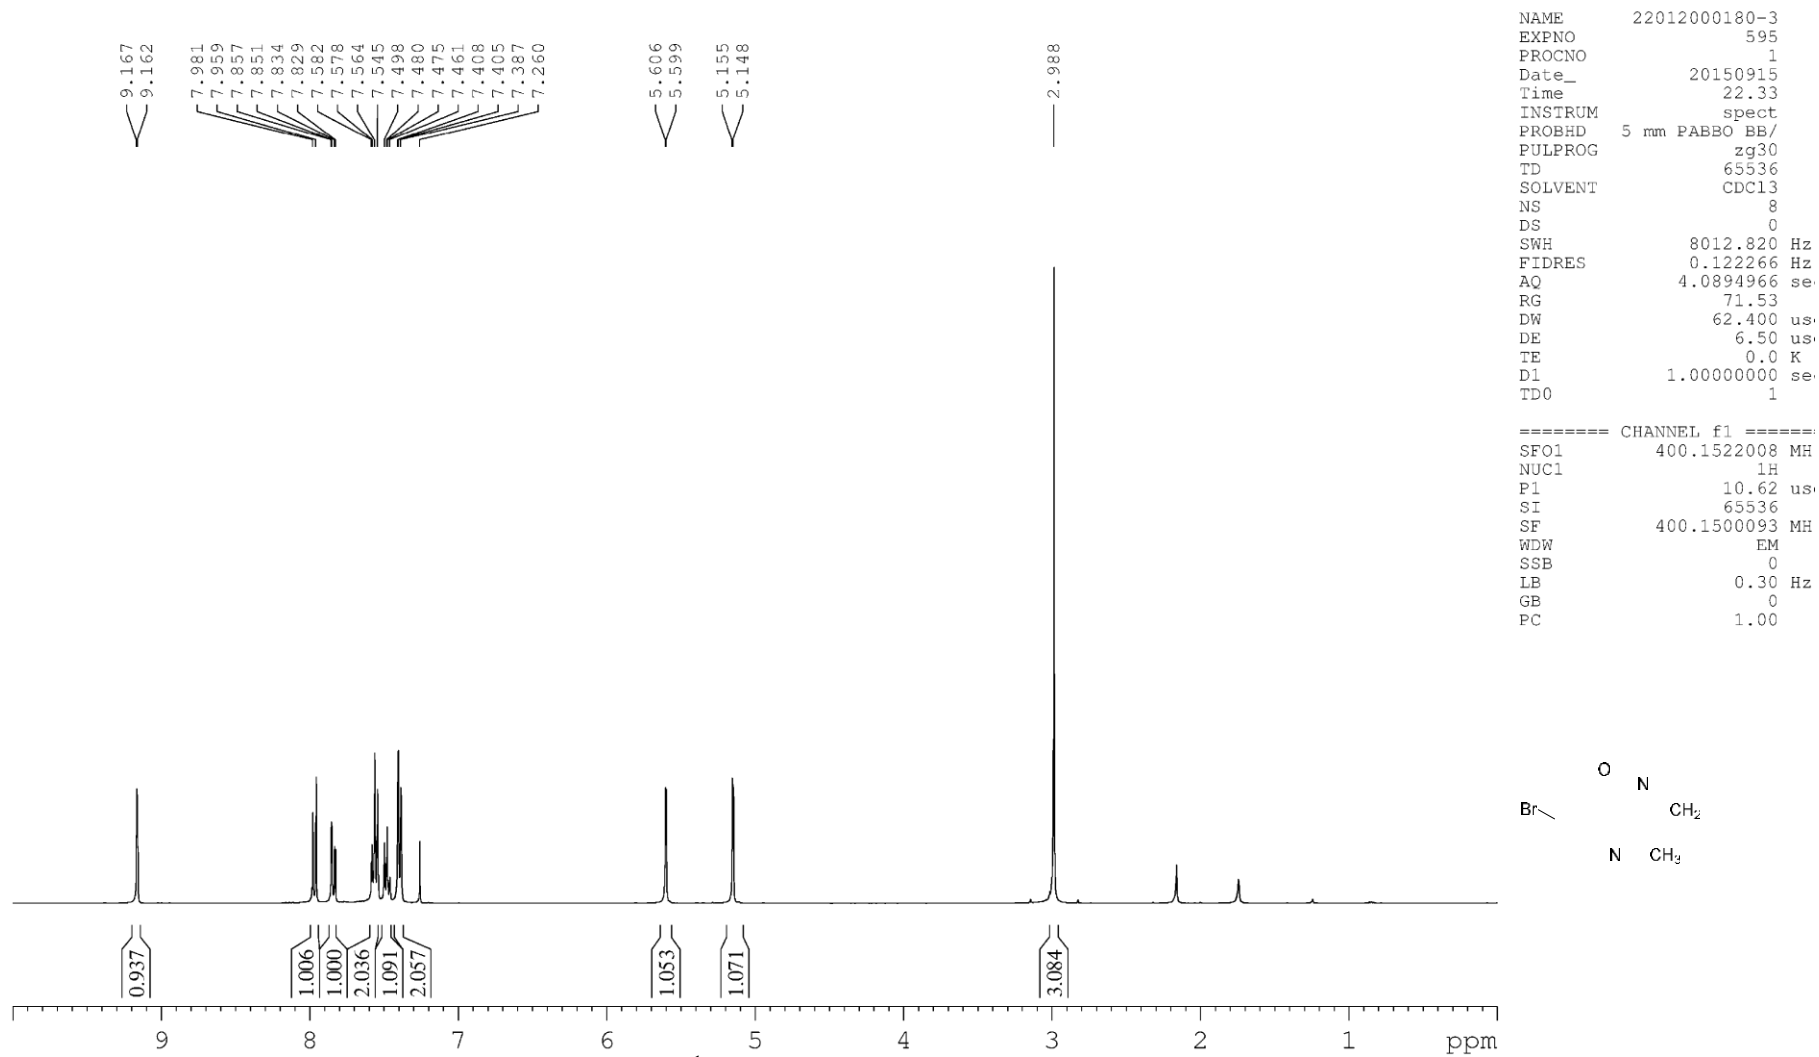

Figure 25. <sup>1</sup>H NMR (400 MHz, CDCl<sub>3</sub>) spectra of compound **6m**

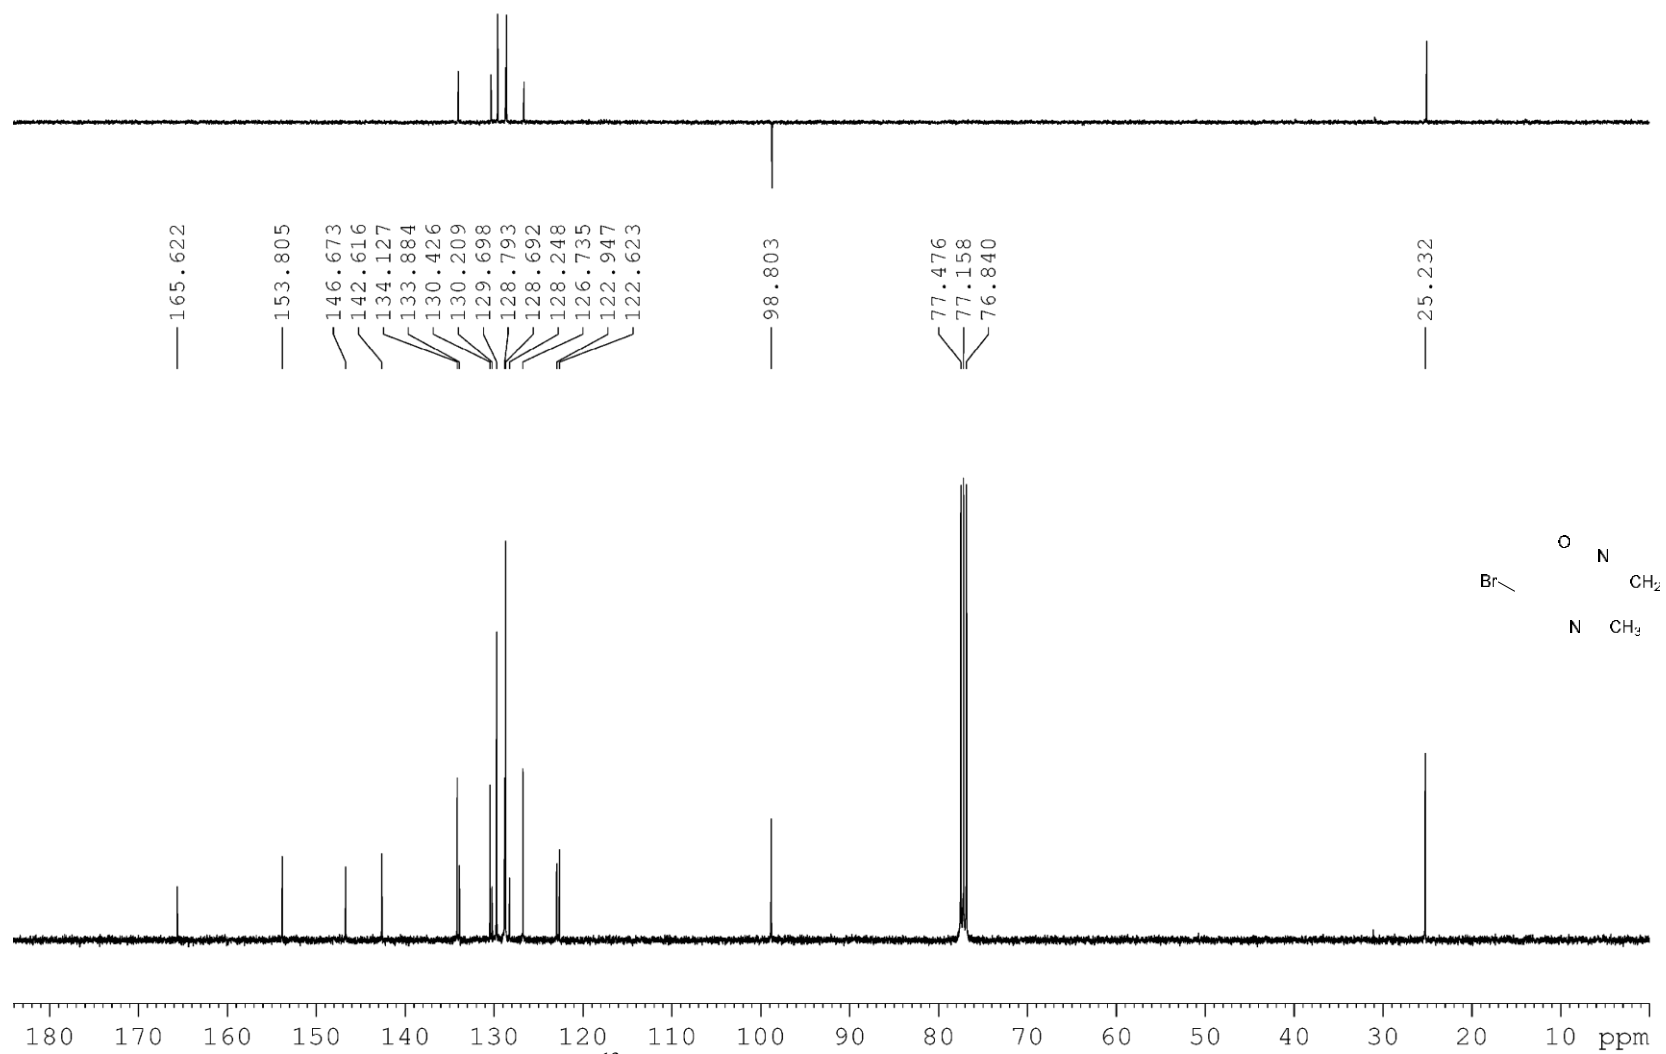

**Figure 26.** <sup>13</sup>C NMR (100 MHz, CDCl<sub>3</sub>) spectra of compound **6m**

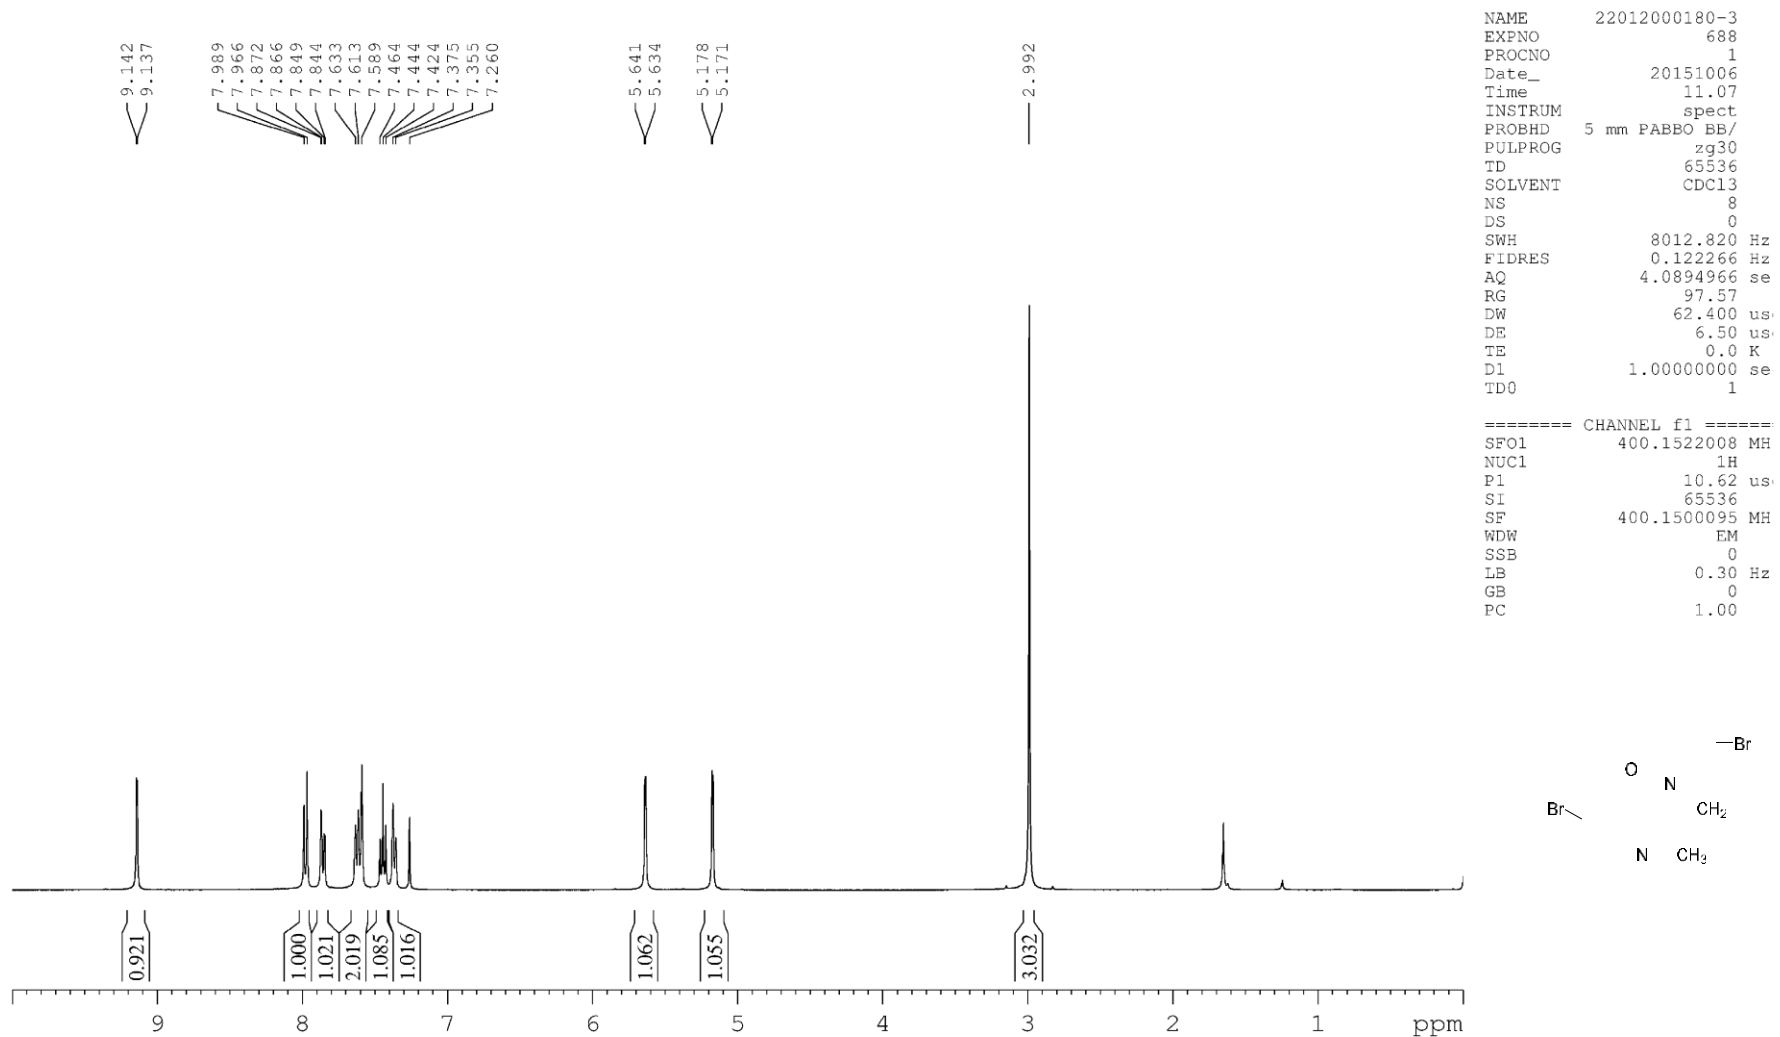

Figure 27. <sup>1</sup>H NMR (400 MHz, CDCl<sub>3</sub>) spectra of compound **6n**

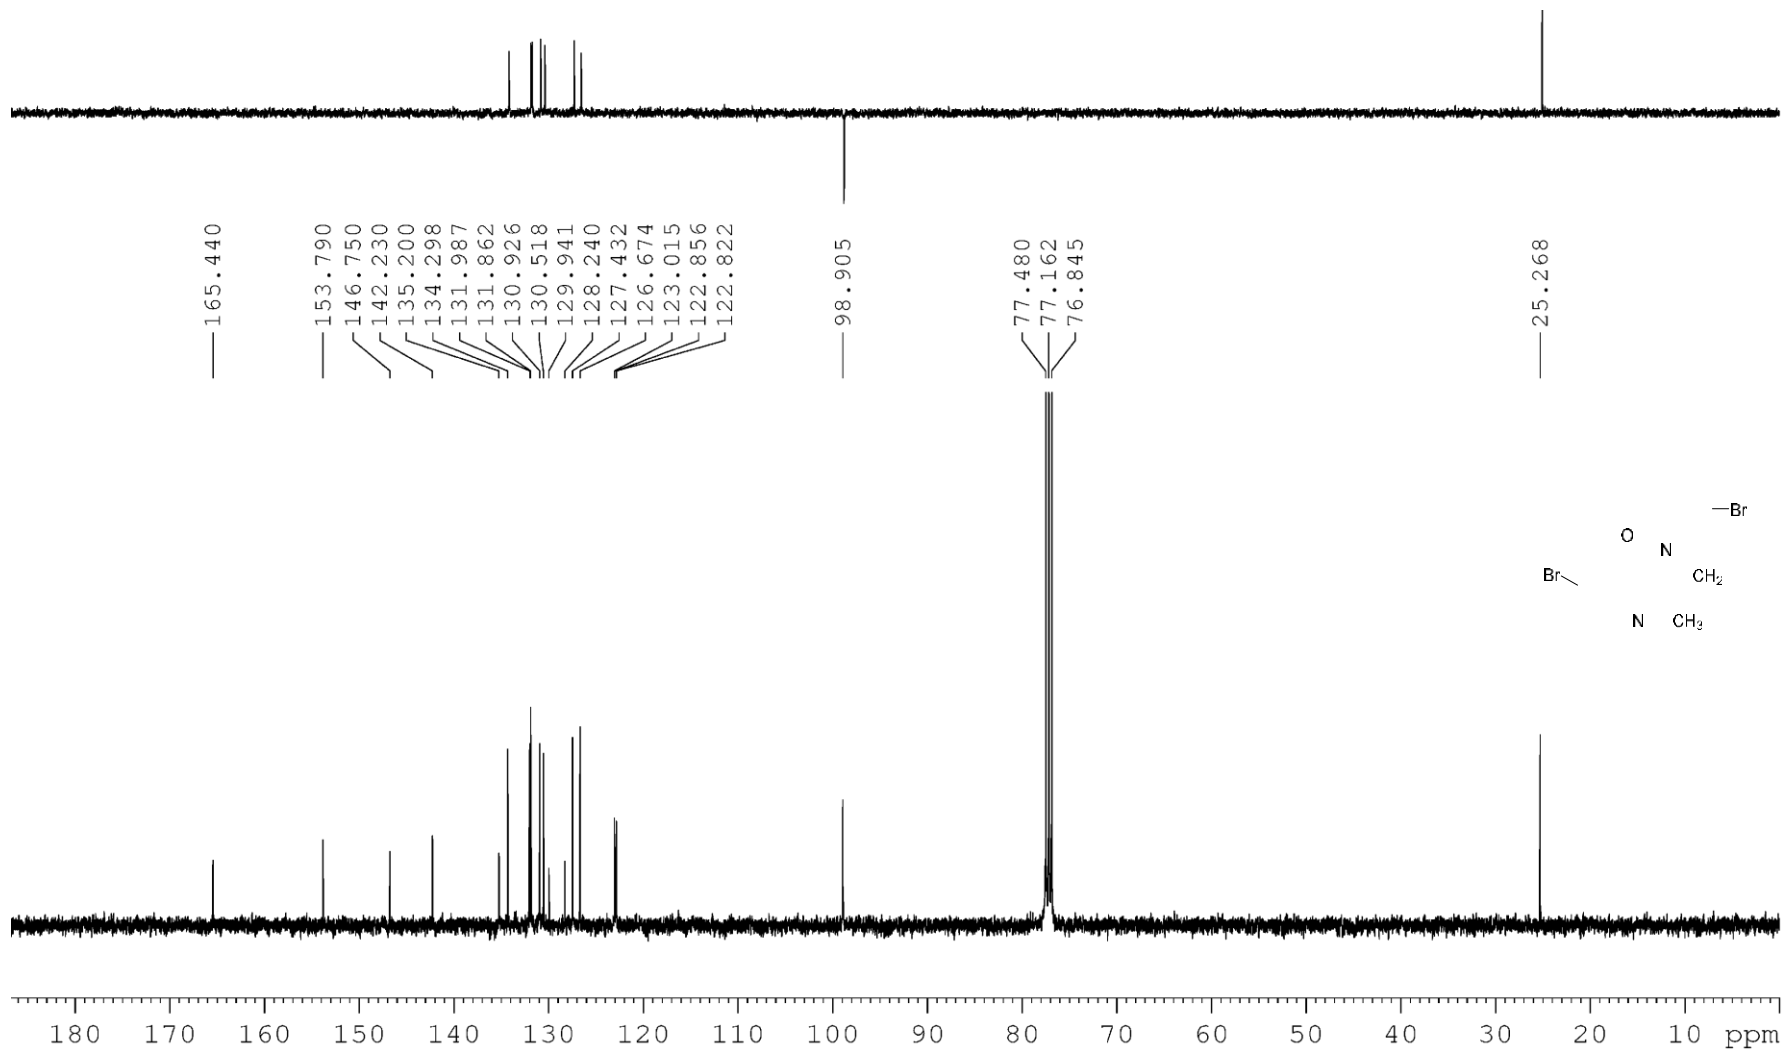

**Figure 28.**  $^{13}\text{C}$  NMR (100 MHz,  $\text{CDCl}_3$ ) spectra of compound **6n**

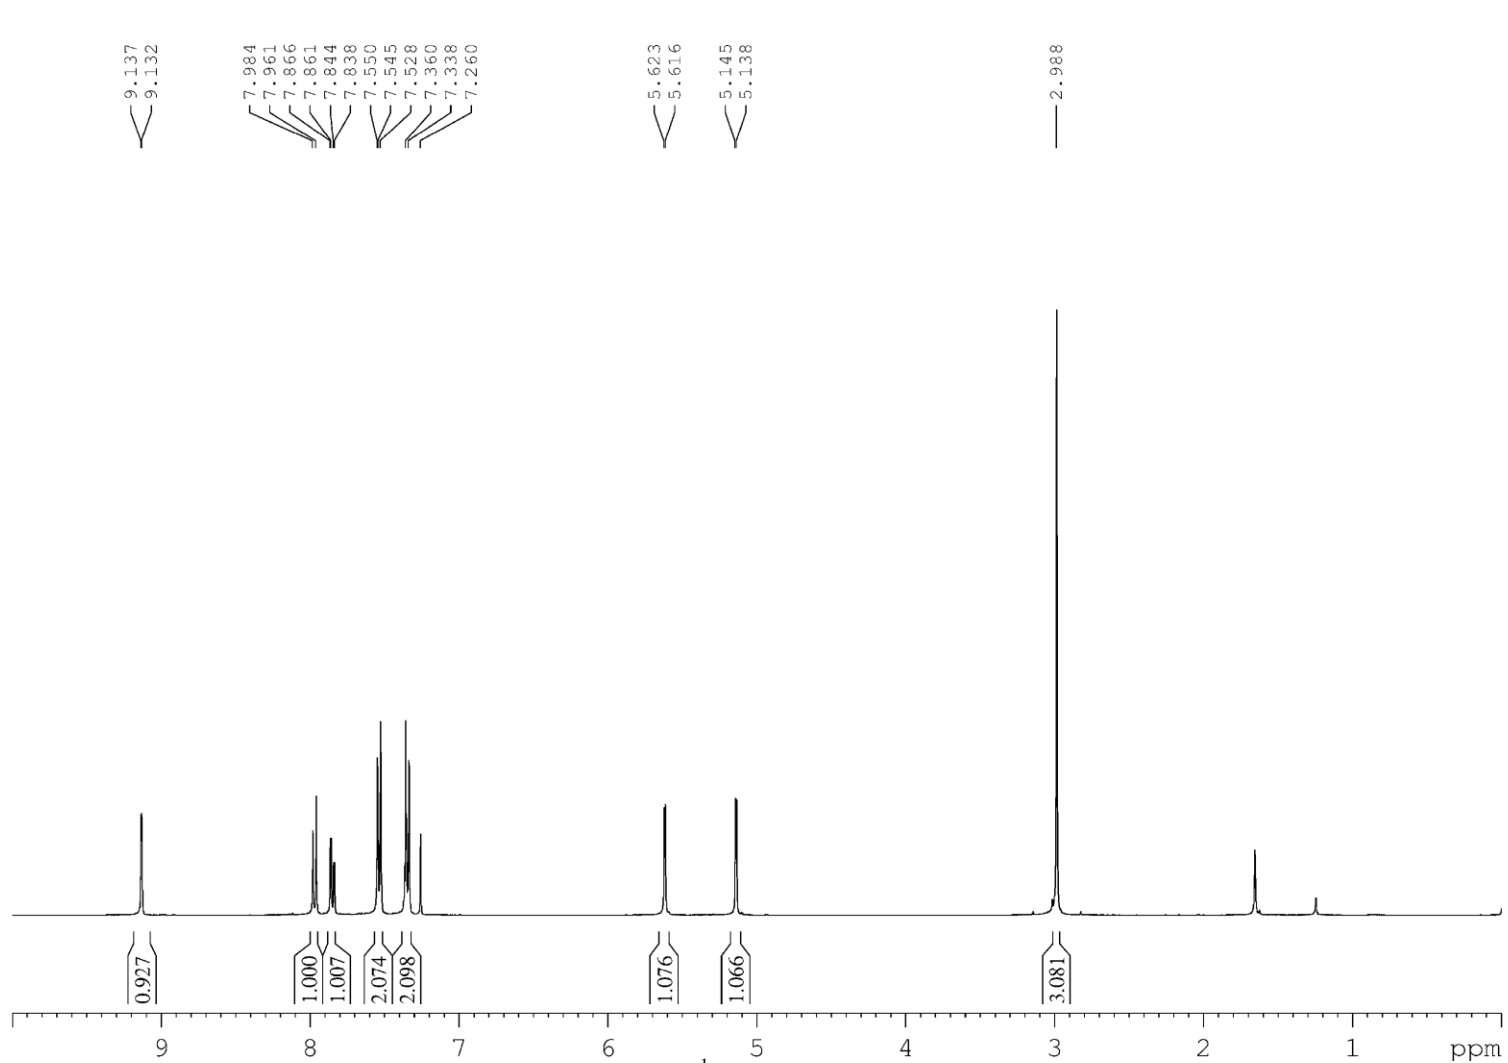

```

NAME      22012000180-3
EXPNO     704
PROCNO    1
Date_     20151006
Time      15.05
INSTRUM   spect
PROBHD    5 mm PABBO BB/
PULPROG   zg30
TD         65536
SOLVENT   CDCl3
NS         8
DS         0
SWH       8012.820 Hz
FIDRES    0.122266 Hz
AQ        4.0894966 sec
RG         87.16
DW        62.400 us
DE         6.50 us
TE         0.0 K
D1         1.00000000 sec
TD0        1

```

```

===== CHANNEL f1 =====
SF01      400.1522008 MH
NUC1       1H
P1         10.62 us
SI         65536
SF         400.1500096 MH
WDW        EM
SSB        0
LB         0.30 Hz
GB         0
PC         1.00

```

Figure 29. <sup>1</sup>H NMR (400 MHz, CDCl<sub>3</sub>) spectra of compound **60**

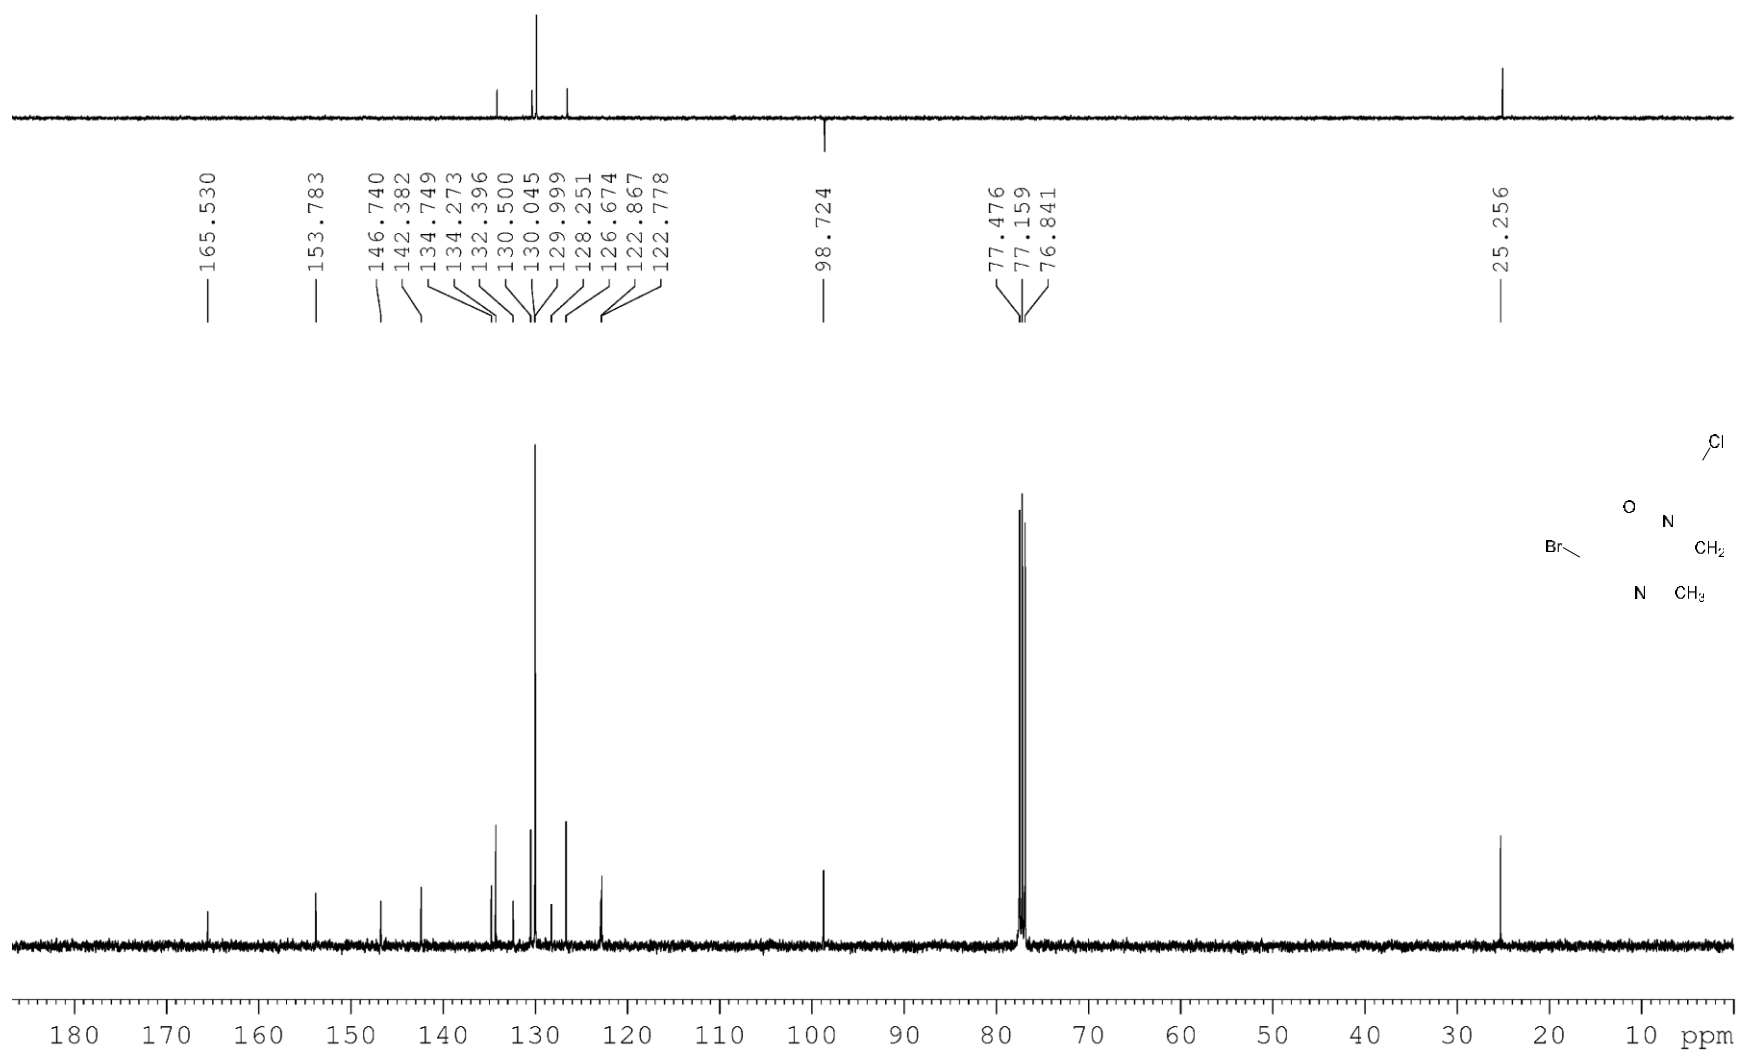

**Figure 30.**  $^{13}\text{C}$  NMR (100 MHz,  $\text{CDCl}_3$ ) spectra of compound **6o**



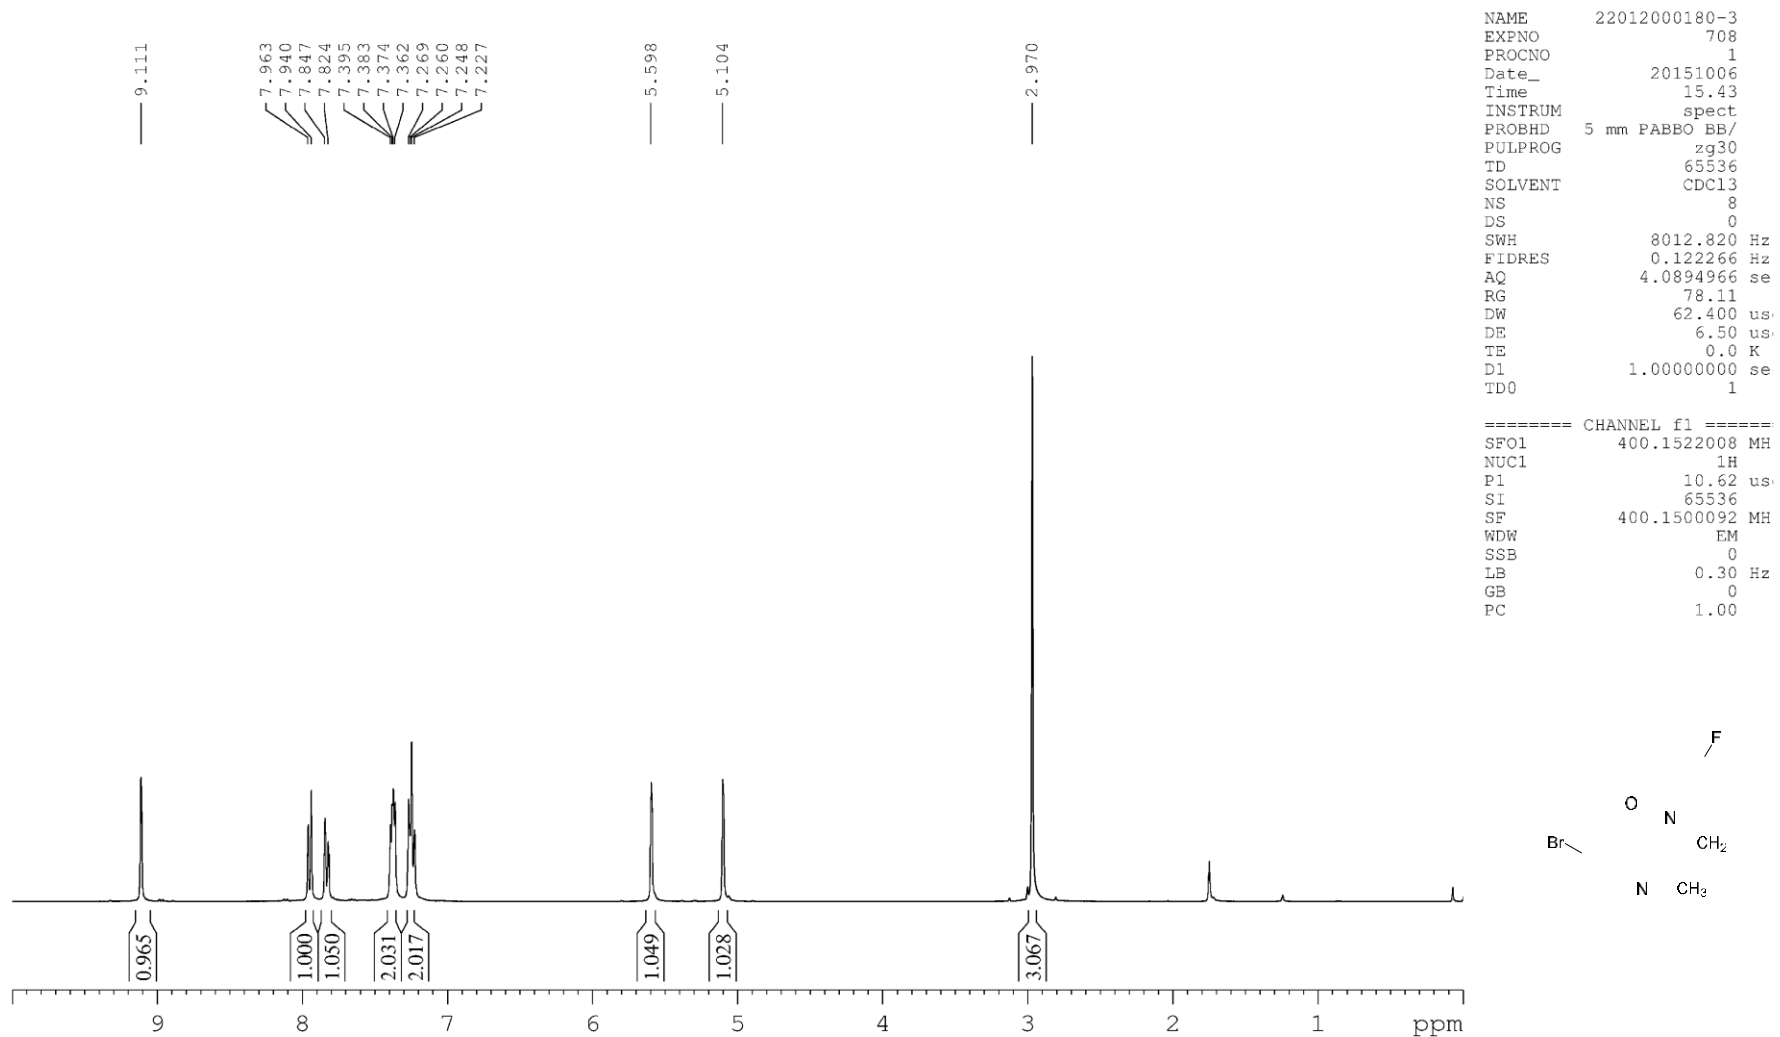

Figure 31. <sup>1</sup>H NMR (400 MHz, CDCl<sub>3</sub>) spectra of compound **6p**

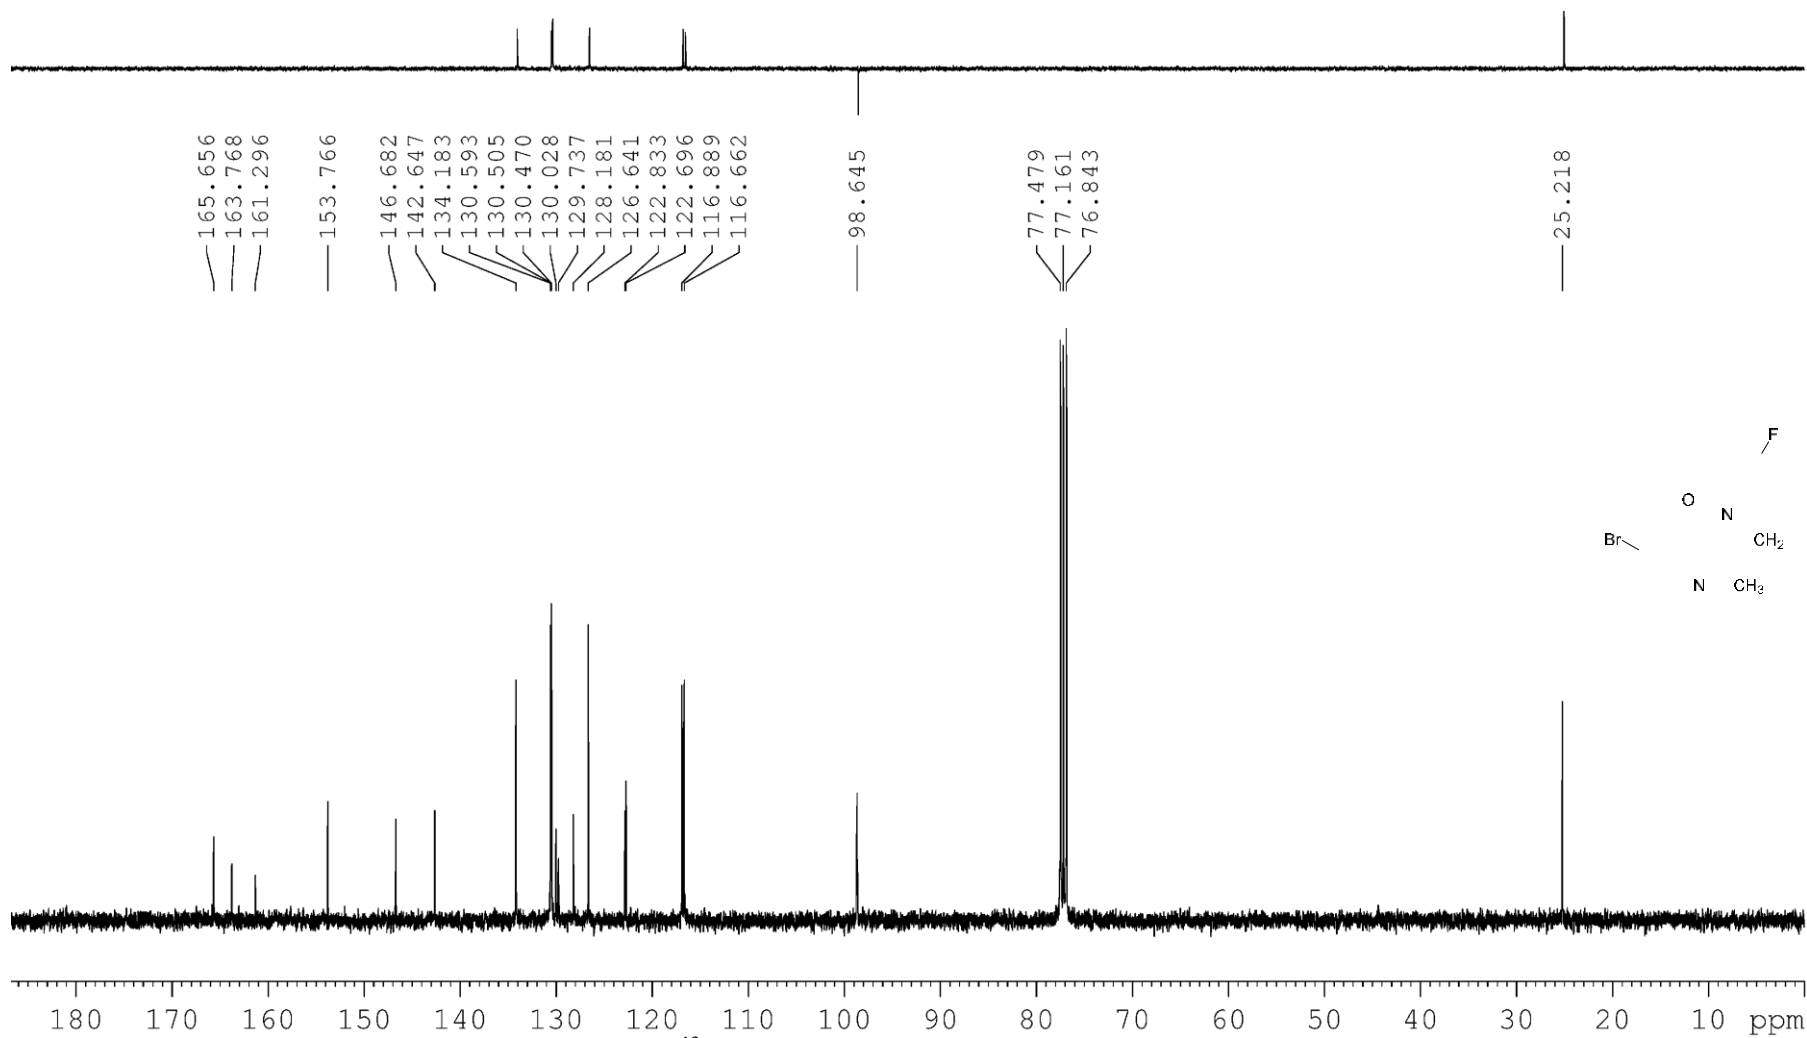

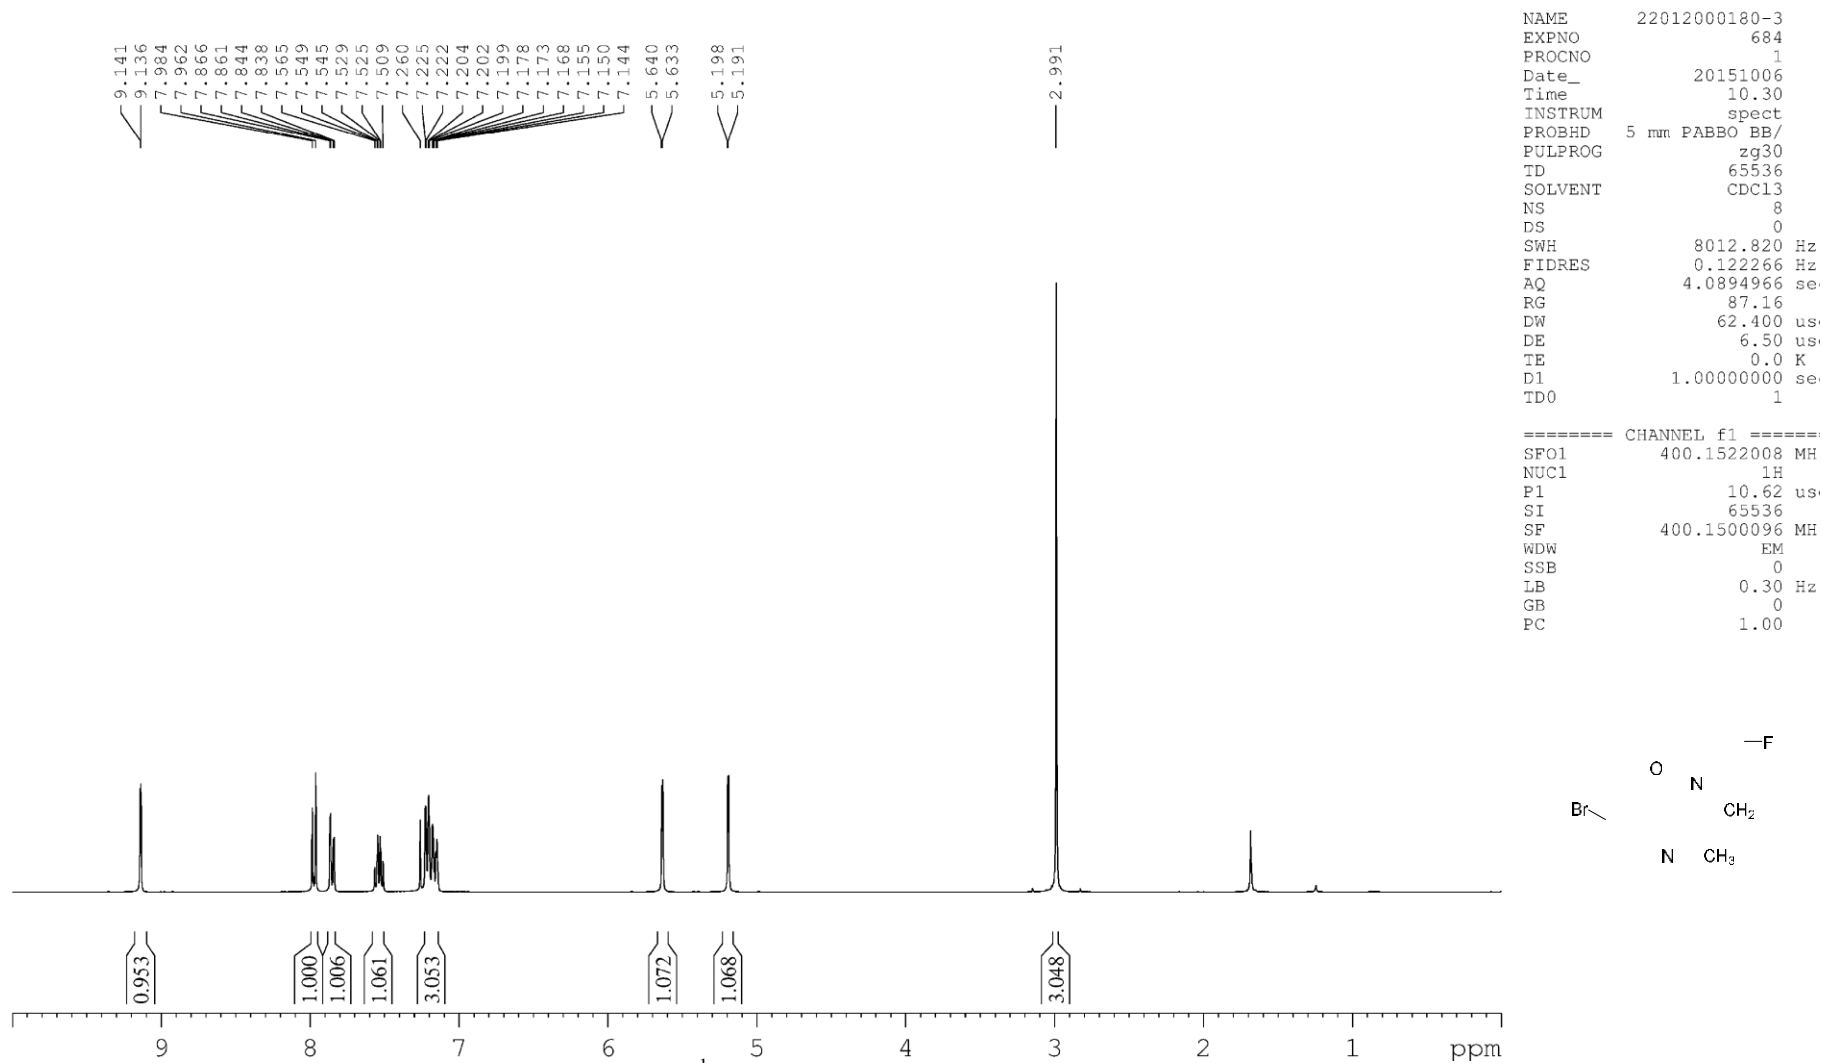

Figure 33. <sup>1</sup>H NMR (400 MHz, CDCl<sub>3</sub>) spectra of compound 6q

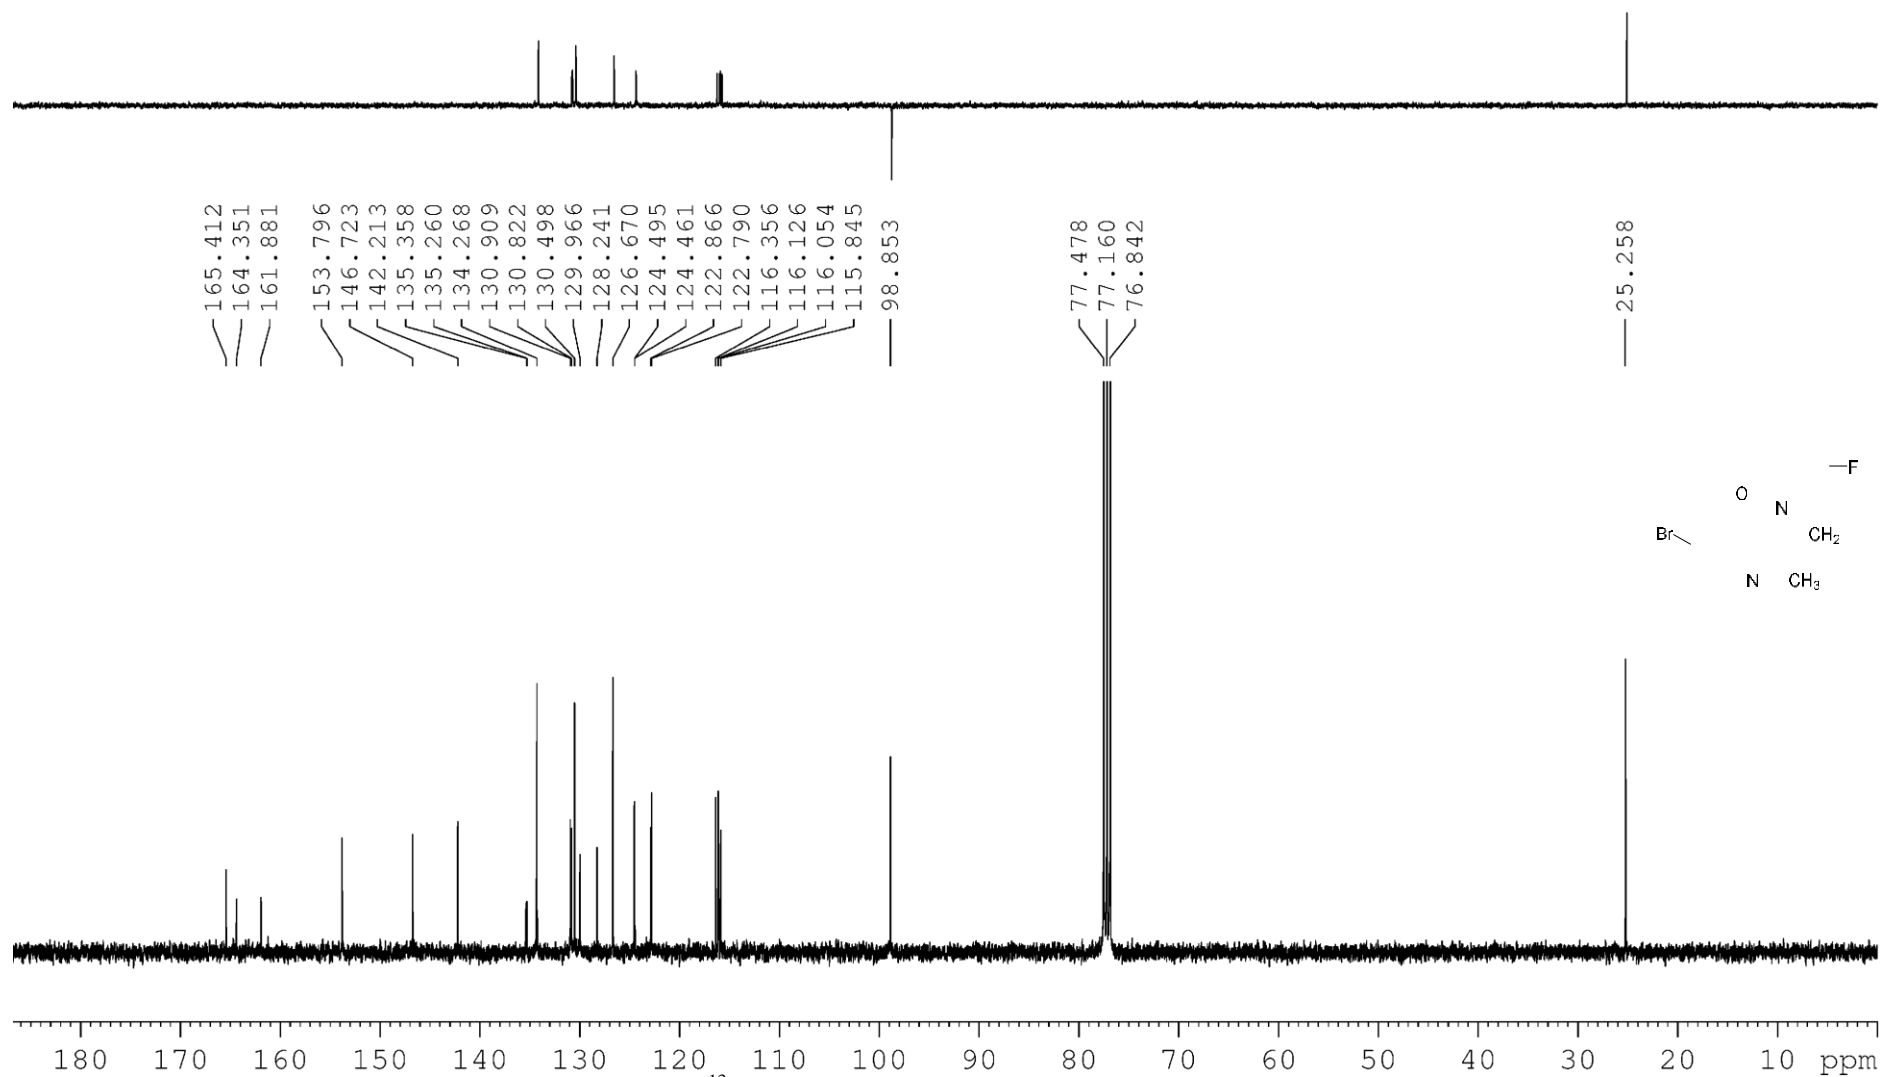

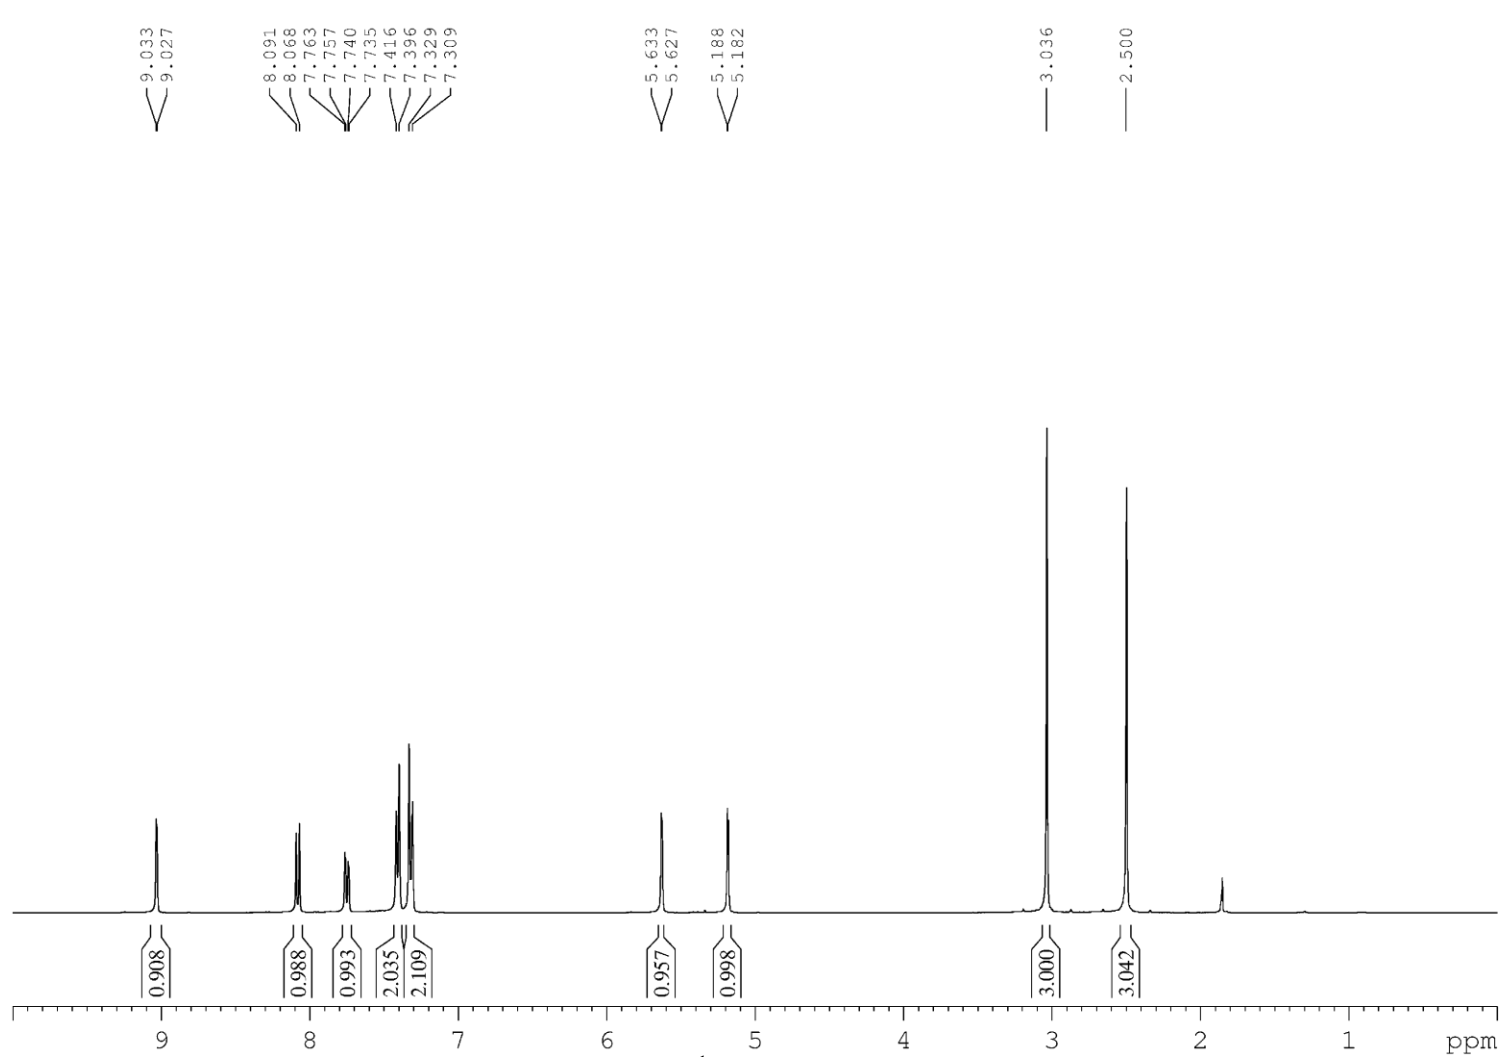

```

NAME      22012000180-5
EXPNO     343
PROCNO    1
Date_     20151215
Time      19.36
INSTRUM   spect
PROBHD    5 mm PABBO BB/
PULPROG   zg30
TD         65536
SOLVENT   CDCl3
NS         8
DS         0
SWH       8012.820 Hz
FIDRES    0.122266 Hz
AQ         4.0894966 se
RG         63.8
DW         62.400 us
DE         6.50 us
TE         0.0 K
D1         1.00000000 se
TD0        1

```

```

===== CHANNEL f1 =====
SFO1      400.1522008 MH
NUC1      1H
P1        10.62 us
SI        65536
SF        400.1499882 MH
WDW       EM
SSB       0
LB        0.30 Hz
GB        0
PC        1.00

```

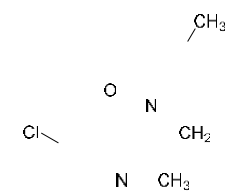

Figure 35. <sup>1</sup>H NMR (400 MHz, CDCl<sub>3</sub>) spectra of compound 6r

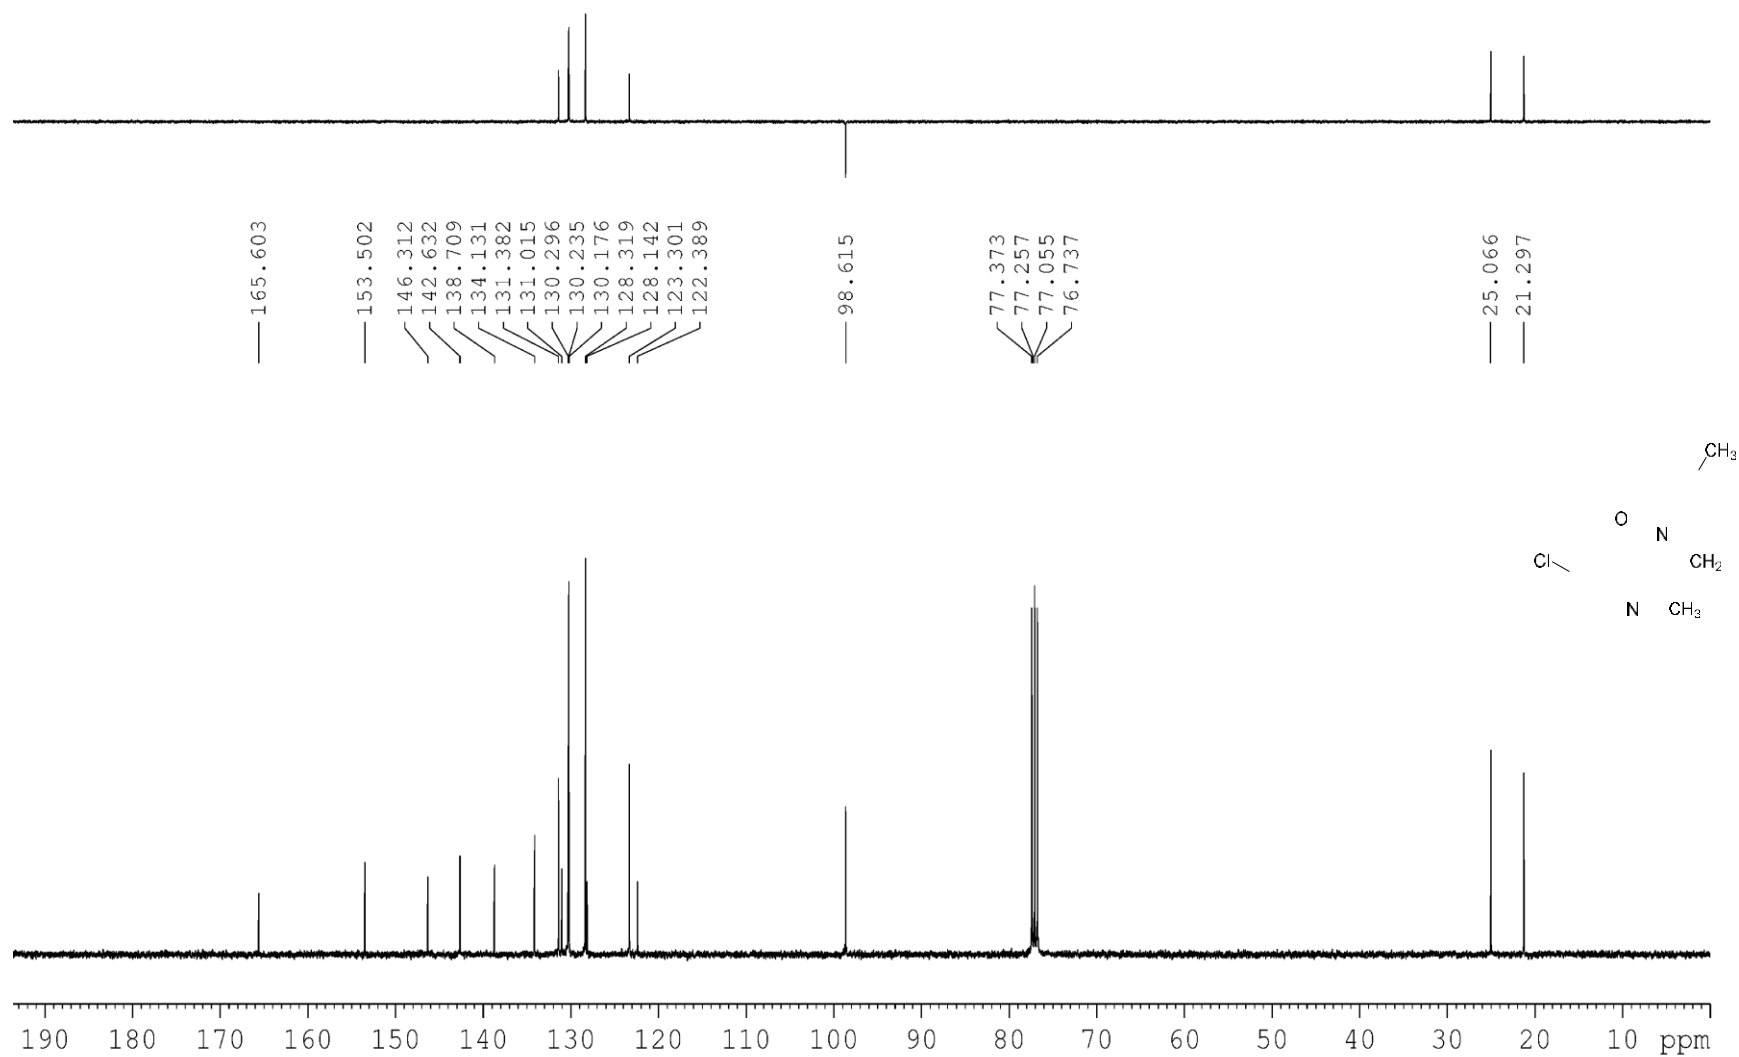

**Figure 36.**  $^{13}\text{C}$  NMR (100 MHz,  $\text{CDCl}_3$ ) spectra of compound **6r**

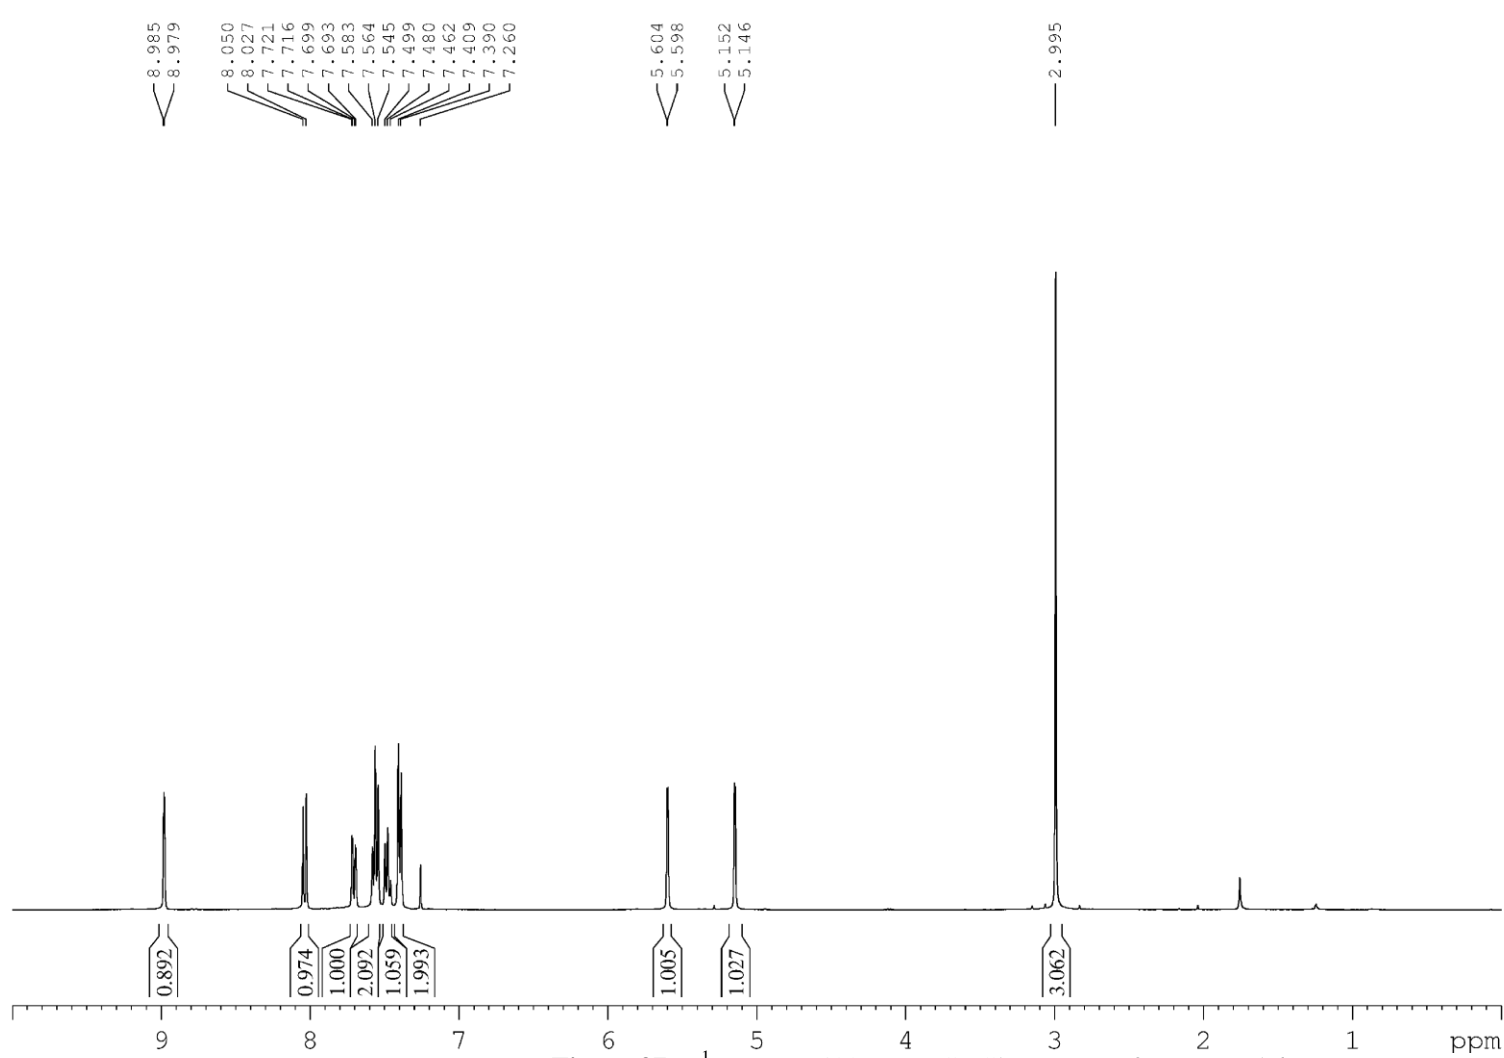

```

NAME      22012000180-5
EXPNO     339
PROCNO    1
Date_     20151215
Time      18.59
INSTRUM   spect
PROBHD    5 mm PABBO BB/
PULPROG   zg30
TD         65536
SOLVENT   CDCl3
NS         8
DS         0
SWH       8012.820 Hz
FIDRES    0.122266 Hz
AQ         4.0894966 se.
RG         71.53
DW         62.400 us.
DE         6.50 us.
TE         0.0 K
D1         1.00000000 se.
TD0        1

```

```

===== CHANNEL f1 =====
SFO1      400.1522008 MH
NUC1      1H
P1        10.62 us.
SI        65536
SF        400.1500092 MH
WDW       EM
SSB       0
LB        0.30 Hz
GB        0
PC        1.00

```

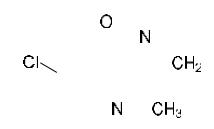

Figure 37. <sup>1</sup>H NMR (400 MHz, CDCl<sub>3</sub>) spectra of compound 6s

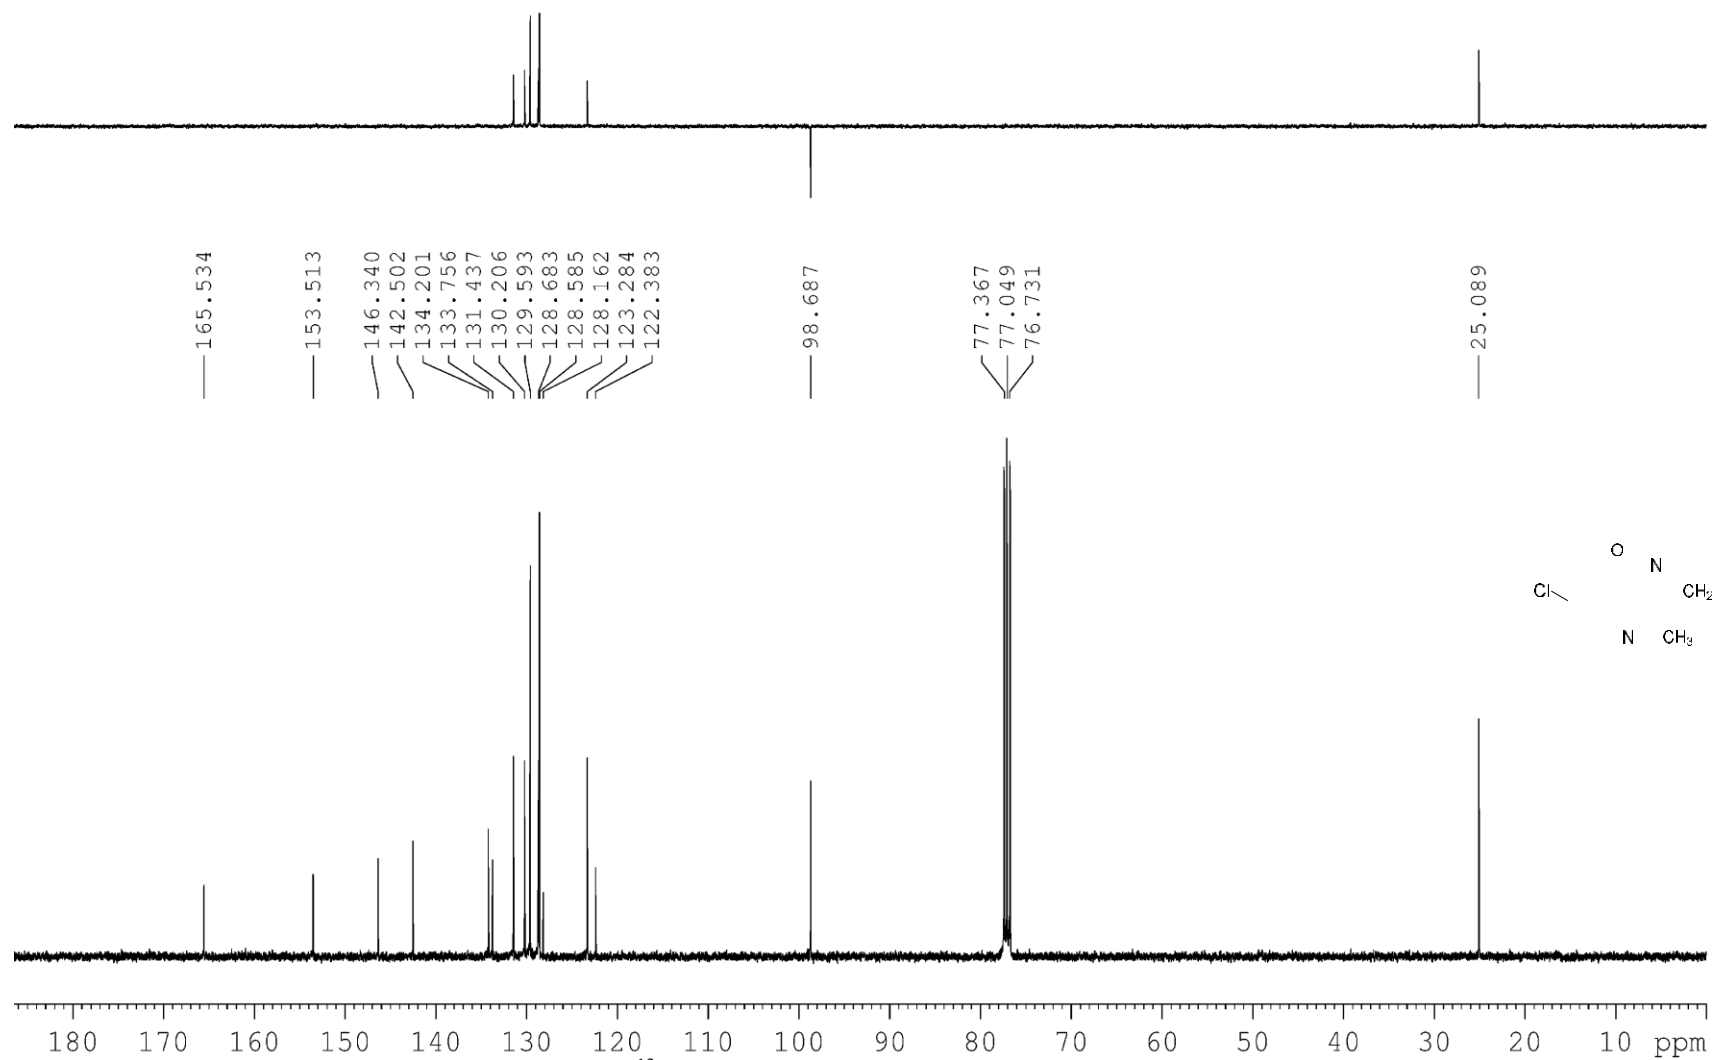

**Figure 38.**  $^{13}\text{C}$  NMR (100 MHz,  $\text{CDCl}_3$ ) spectra of compound **6s**



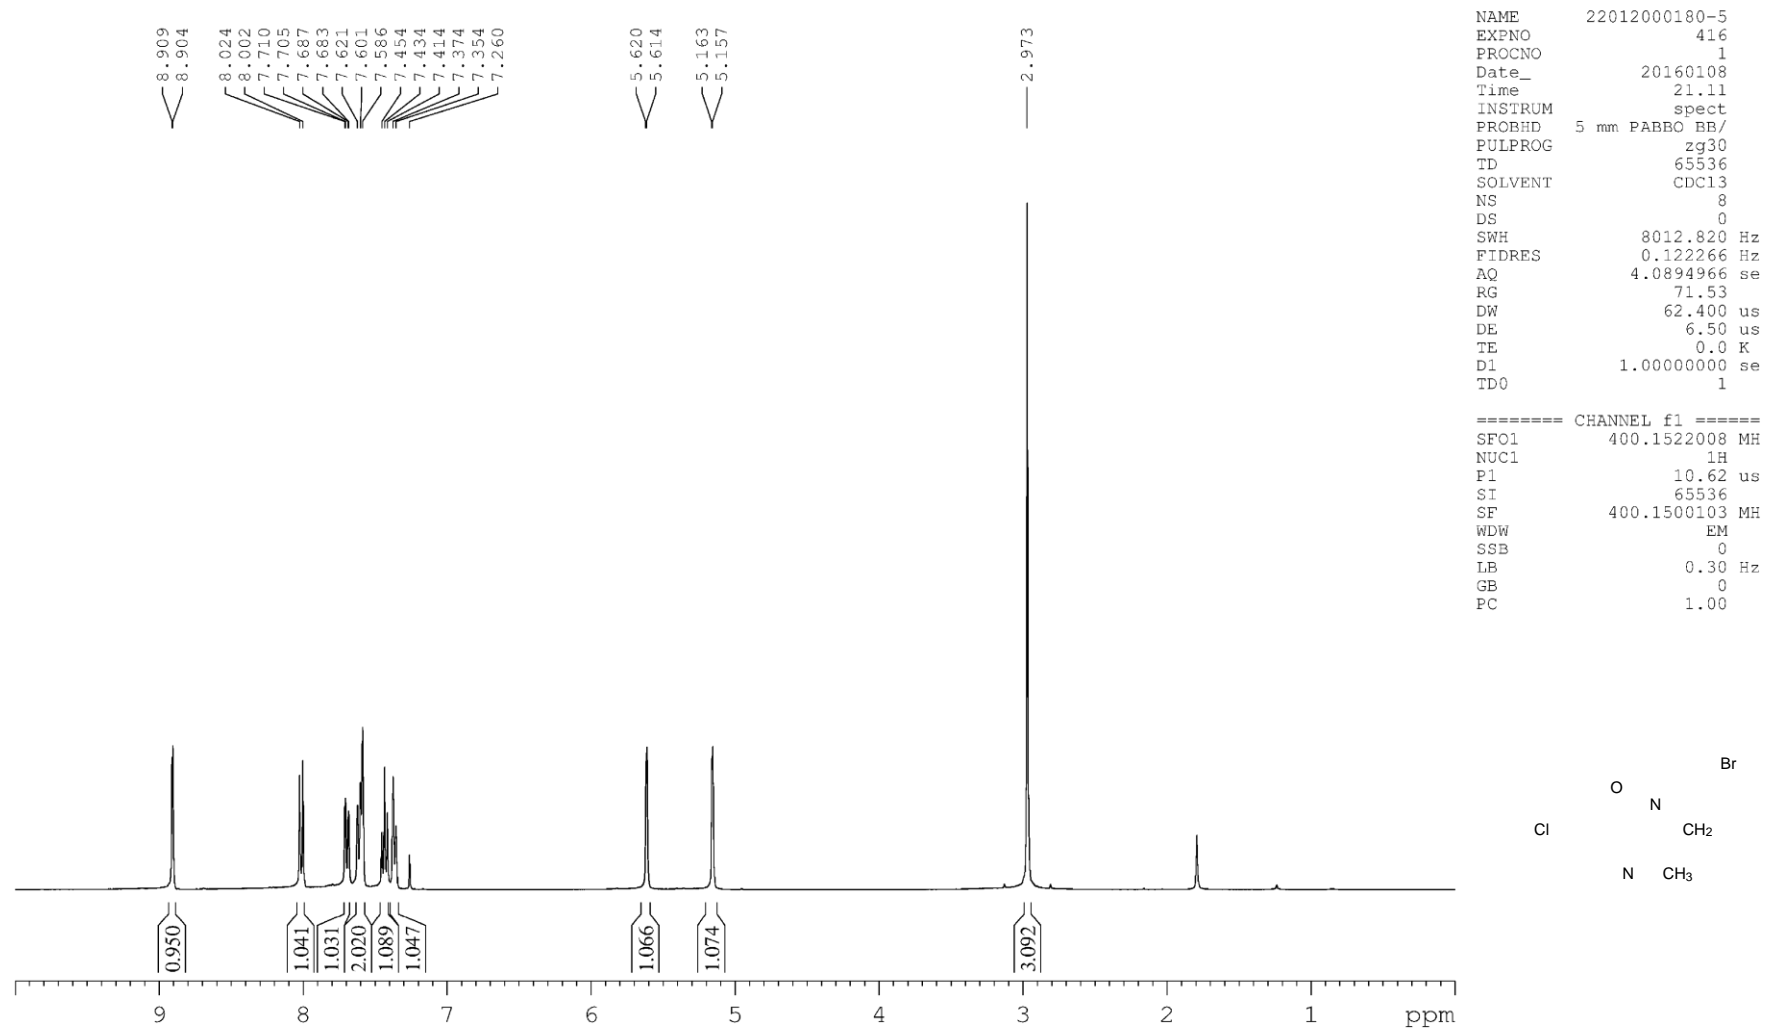

Figure 39.  $^1\text{H}$  NMR (400 MHz,  $\text{CDCl}_3$ ) spectra of compound **6t**

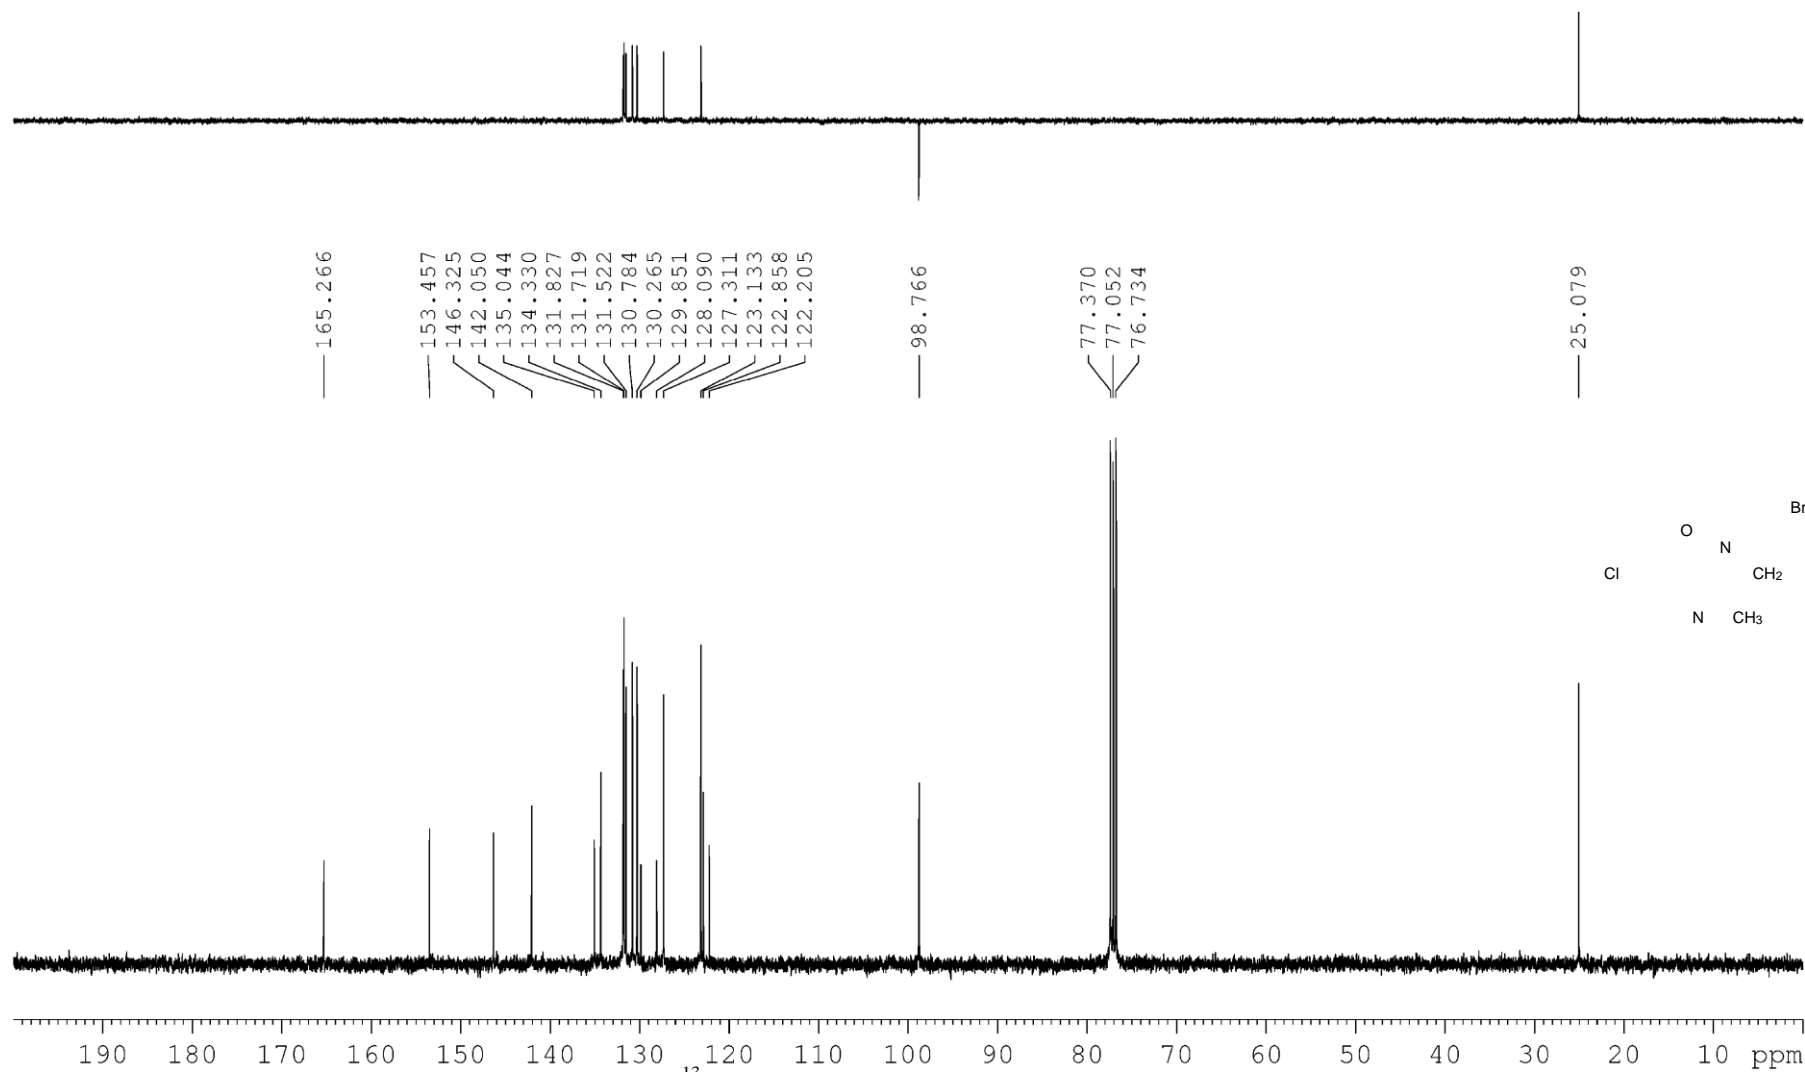

**Figure 40.**  $^{13}\text{C}$  NMR (100 MHz,  $\text{CDCl}_3$ ) spectra of compound **6t**

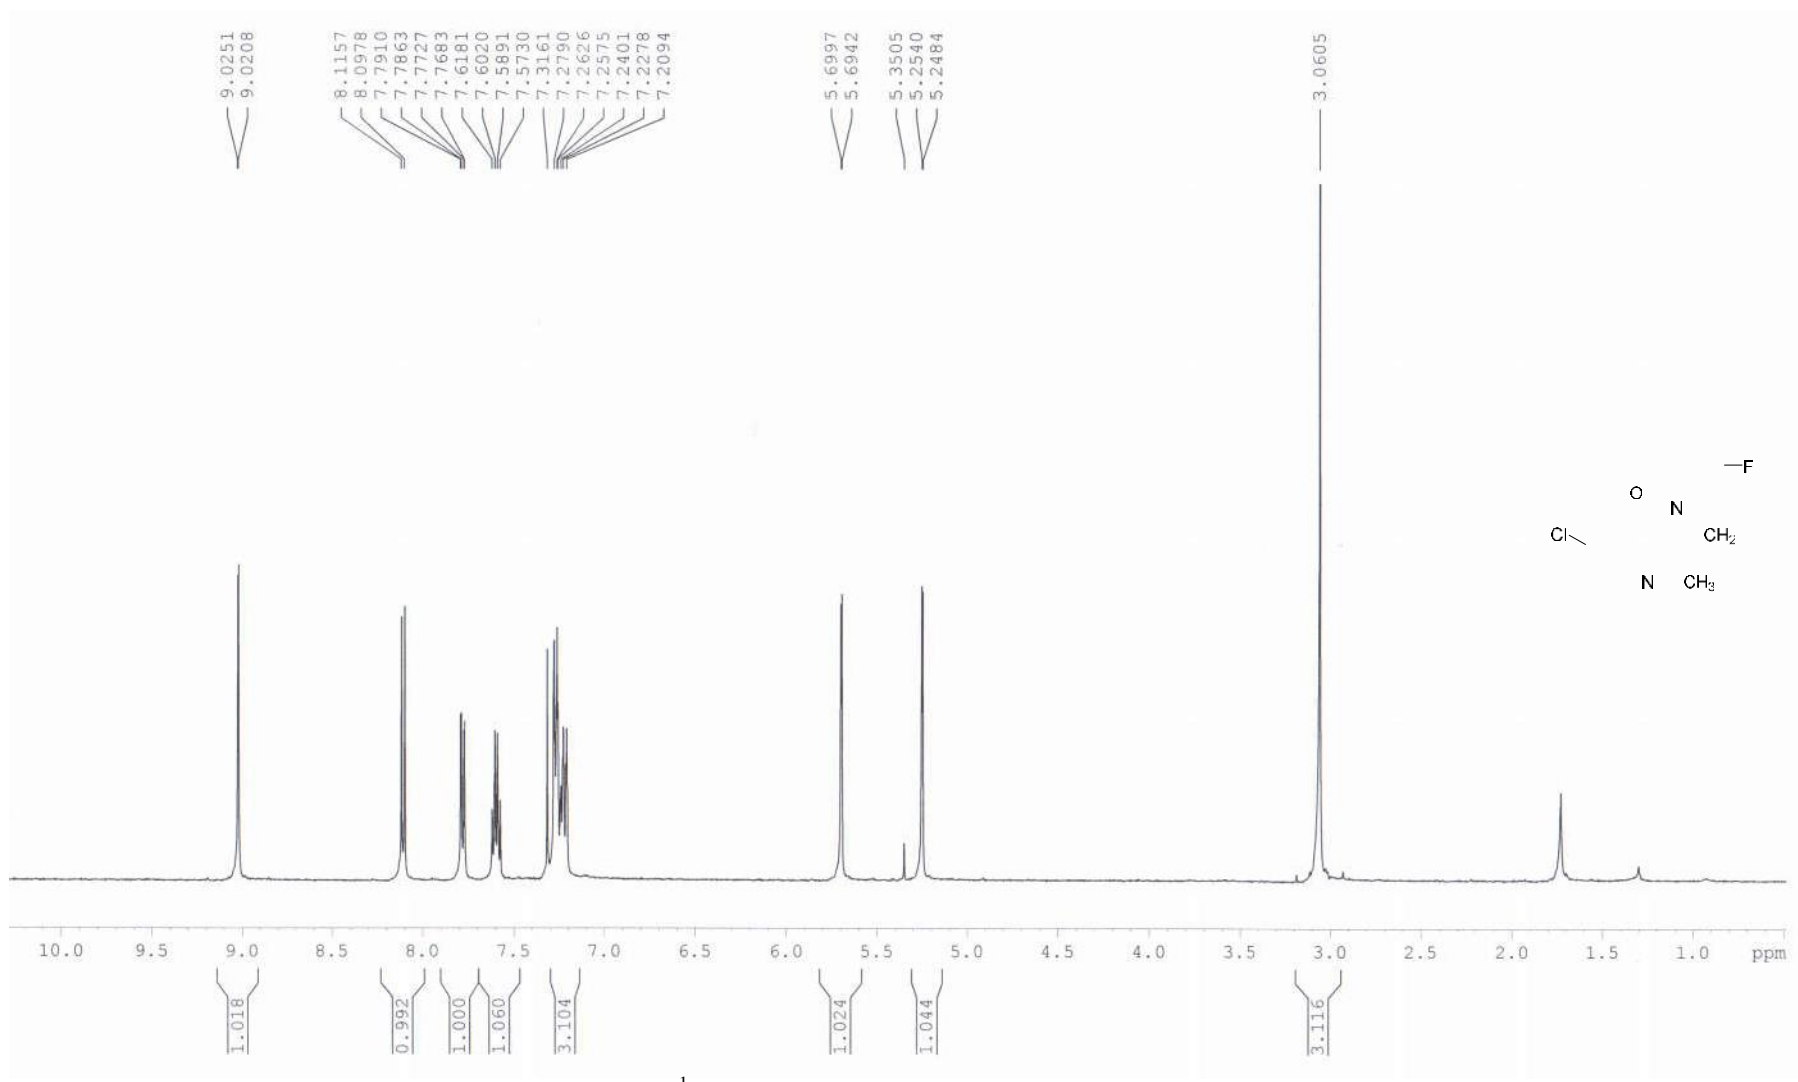

**Figure 41.** <sup>1</sup>H NMR (500 MHz, CDCl<sub>3</sub>) spectra of compound **6u**

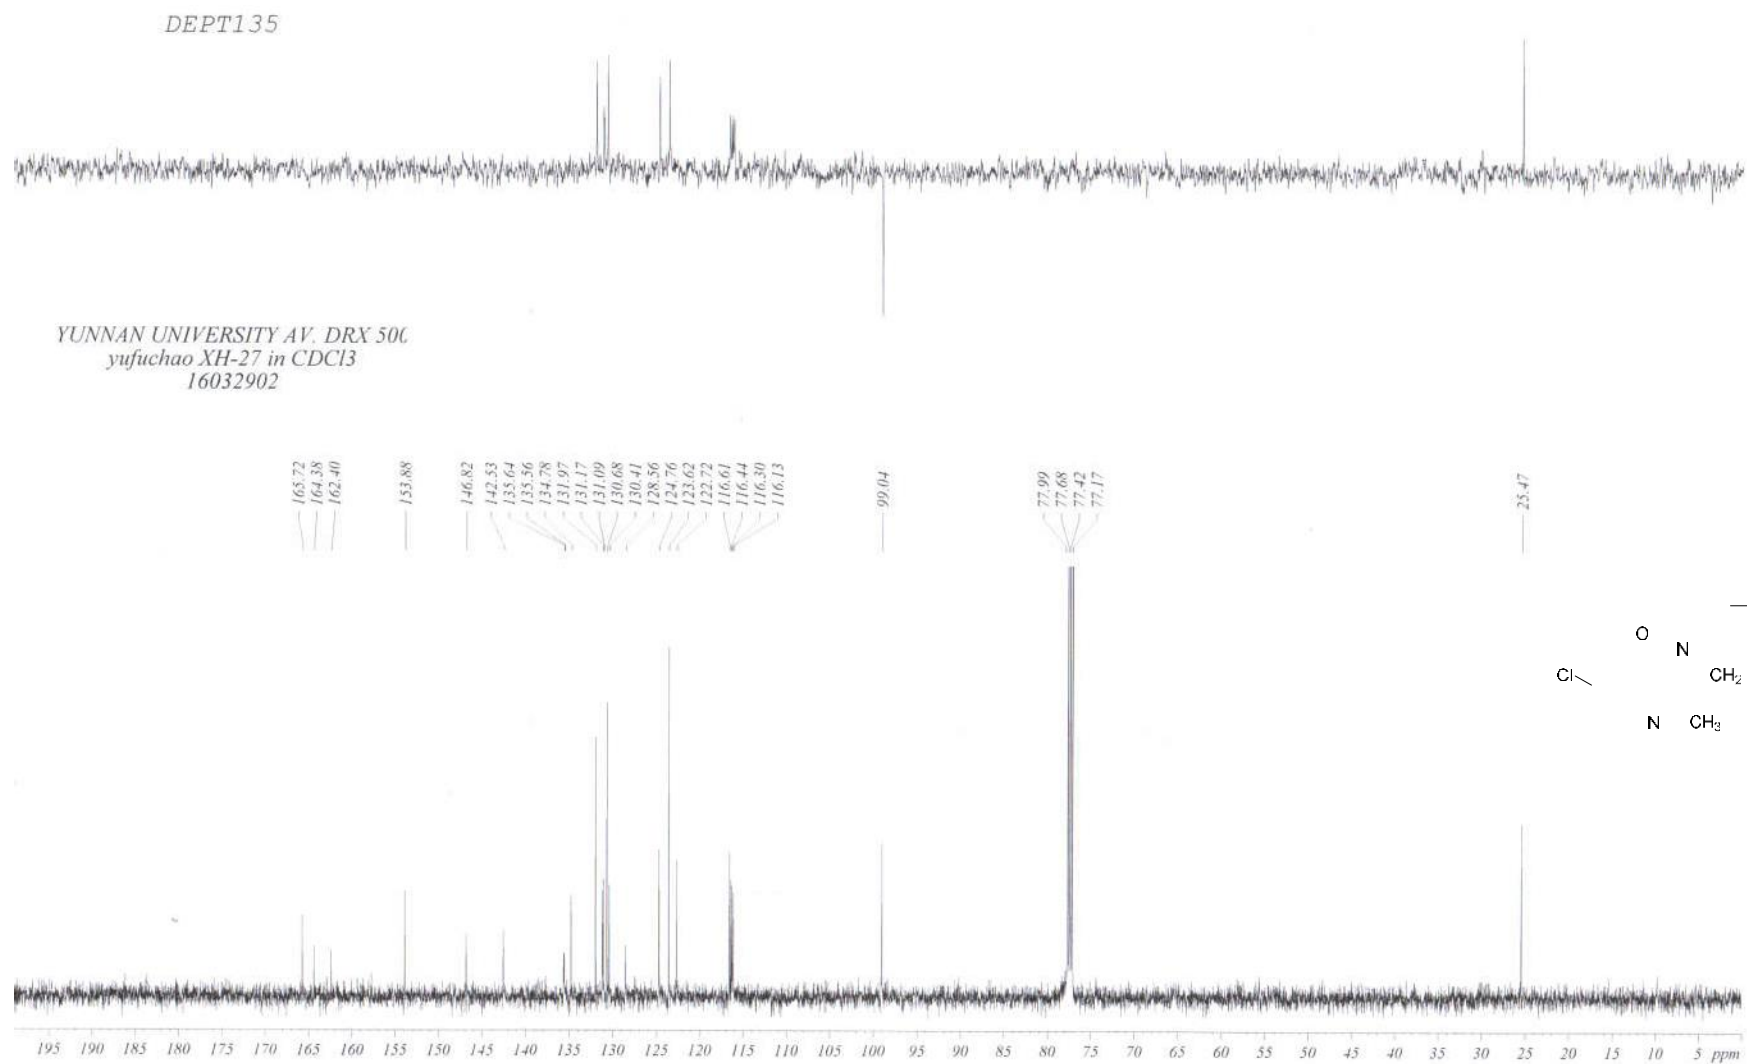

Figure 42. <sup>13</sup>C NMR (125 MHz, CDCl<sub>3</sub>) spectra of compound **6u**

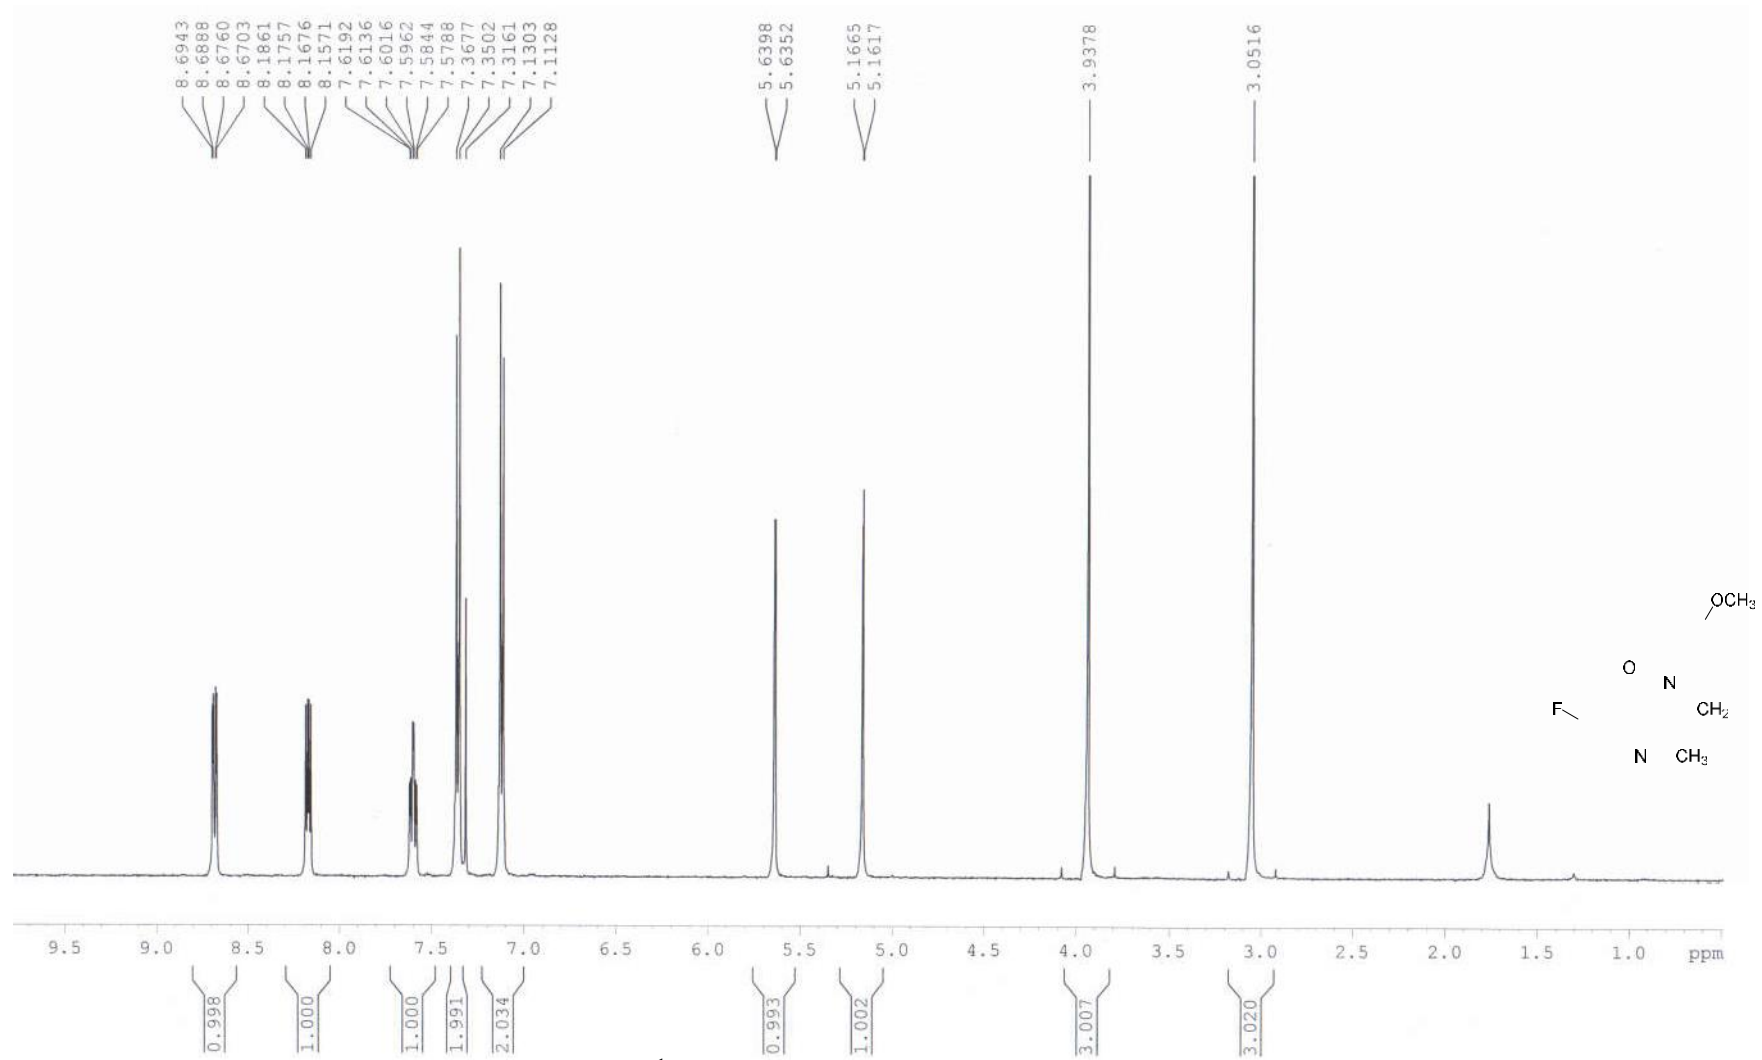

Figure 43.  $^1\text{H}$  NMR (500 MHz,  $\text{CDCl}_3$ ) spectra of compound **6v**

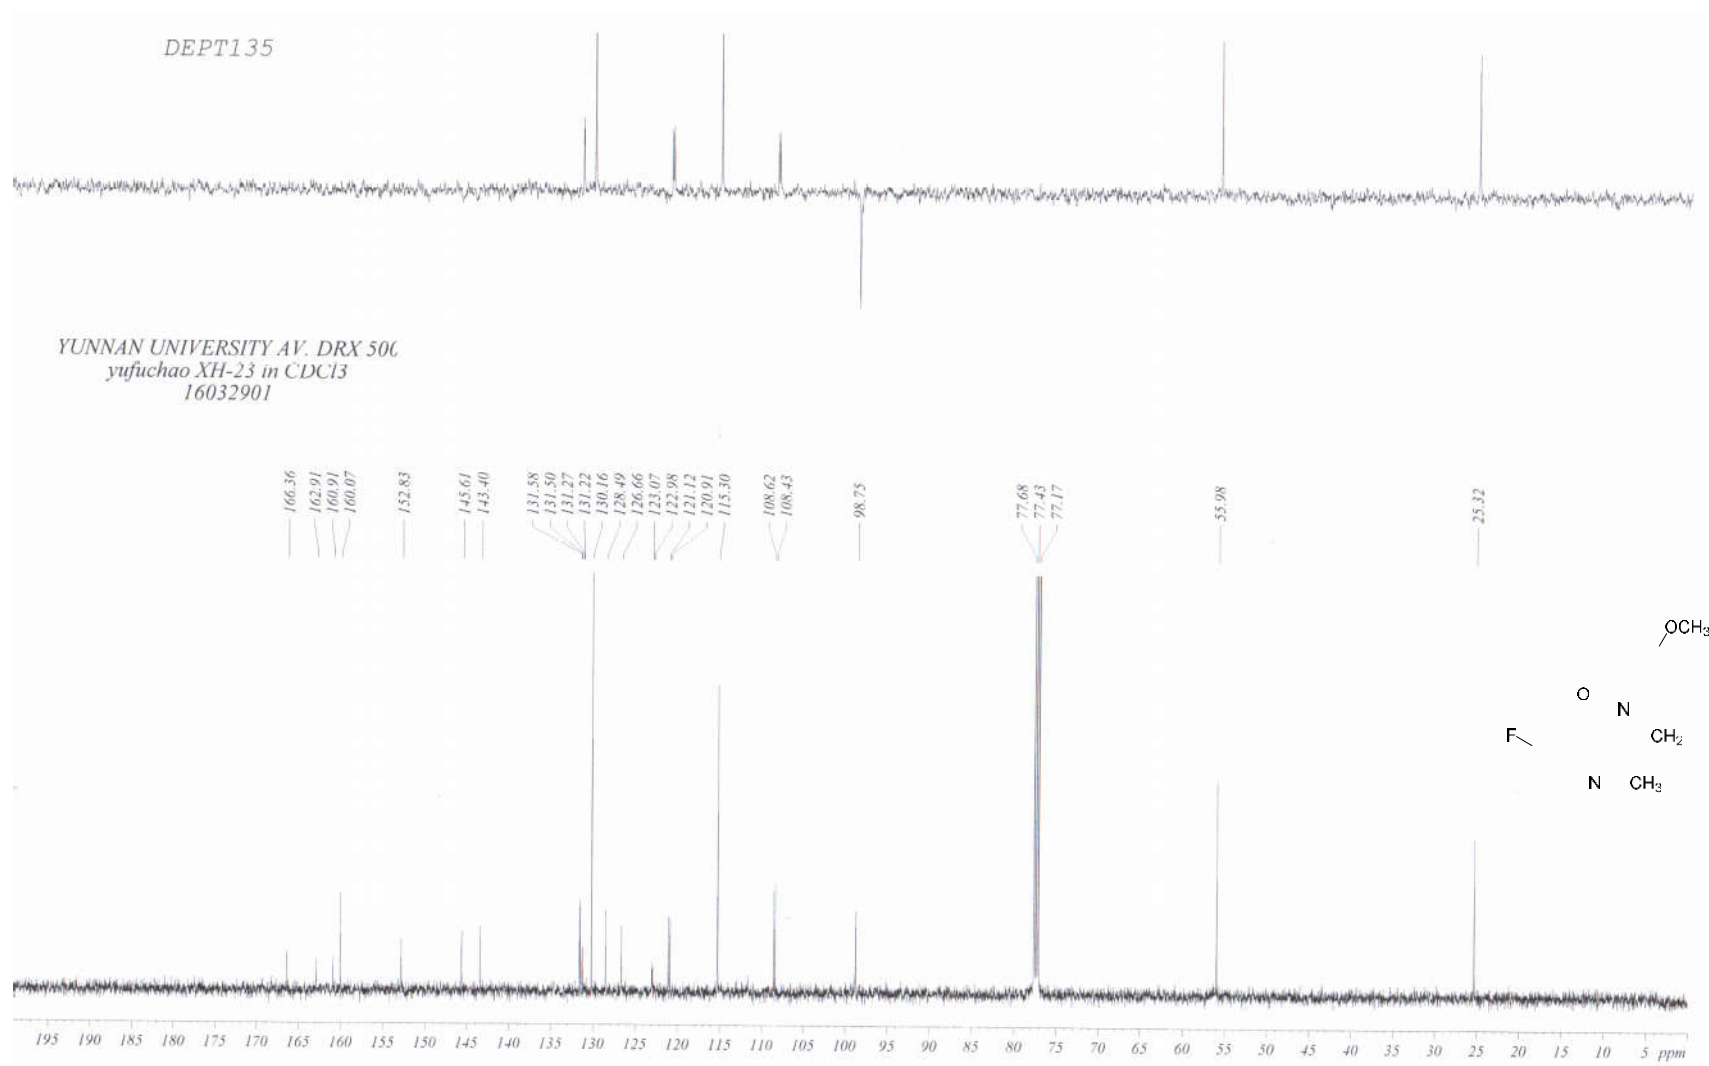

Figure 44. <sup>13</sup>C NMR (125 MHz, CDCl<sub>3</sub>) spectra of compound 6v

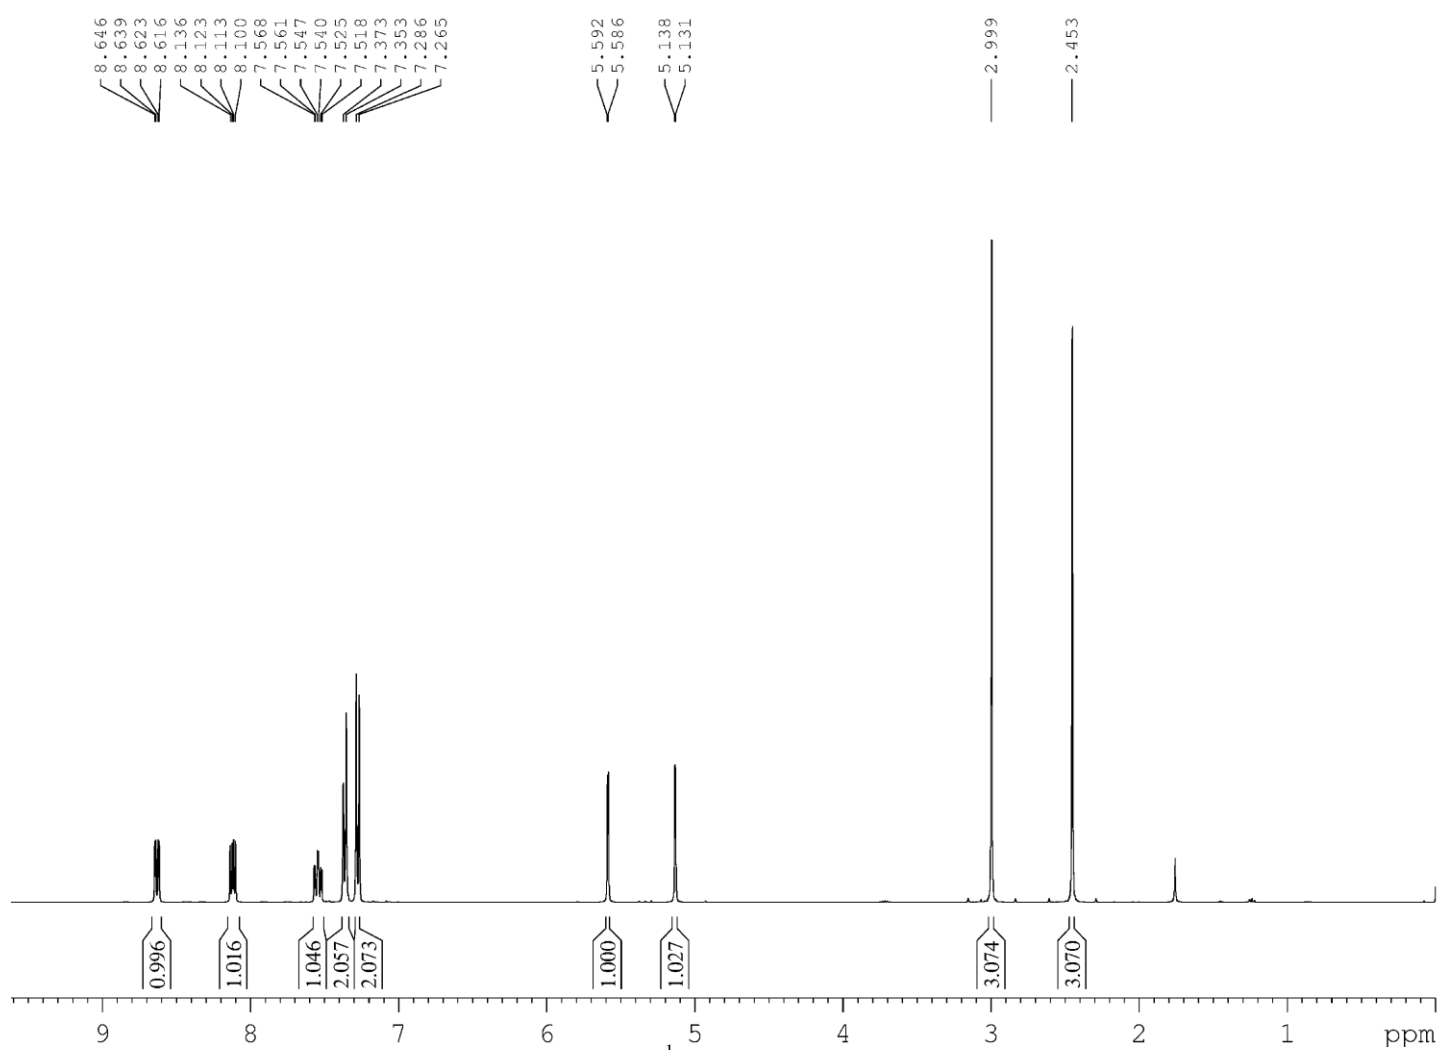

```

NAME      22012000180-3
EXPNO     855
PROCNO    1
Date_     20151018
Time      15.31
INSTRUM   spect
PROBHD    5 mm PABBO BB/
PULPROG   zg30
TD         65536
SOLVENT   CDCl3
NS         8
DS         0
SWH       8012.820 Hz
FIDRES    0.122266 Hz
AQ         4.0894966 se
RG         71.53
DW         62.400 us
DE         6.50 us
TE         0.0 K
D1         1.00000000 se
TD0        1

===== CHANNEL f1 =====
SFO1      400.1522008 MH
NUC1       1H
P1         10.62 us
SI         65536
SF         400.1500074 MH
WDW        EM
SSB        0
LB         0.30 Hz
GB         0
PC         1.00

```

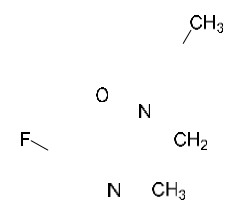

Figure 45. <sup>1</sup>H NMR (400 MHz, CDCl<sub>3</sub>) spectra of compound 6w

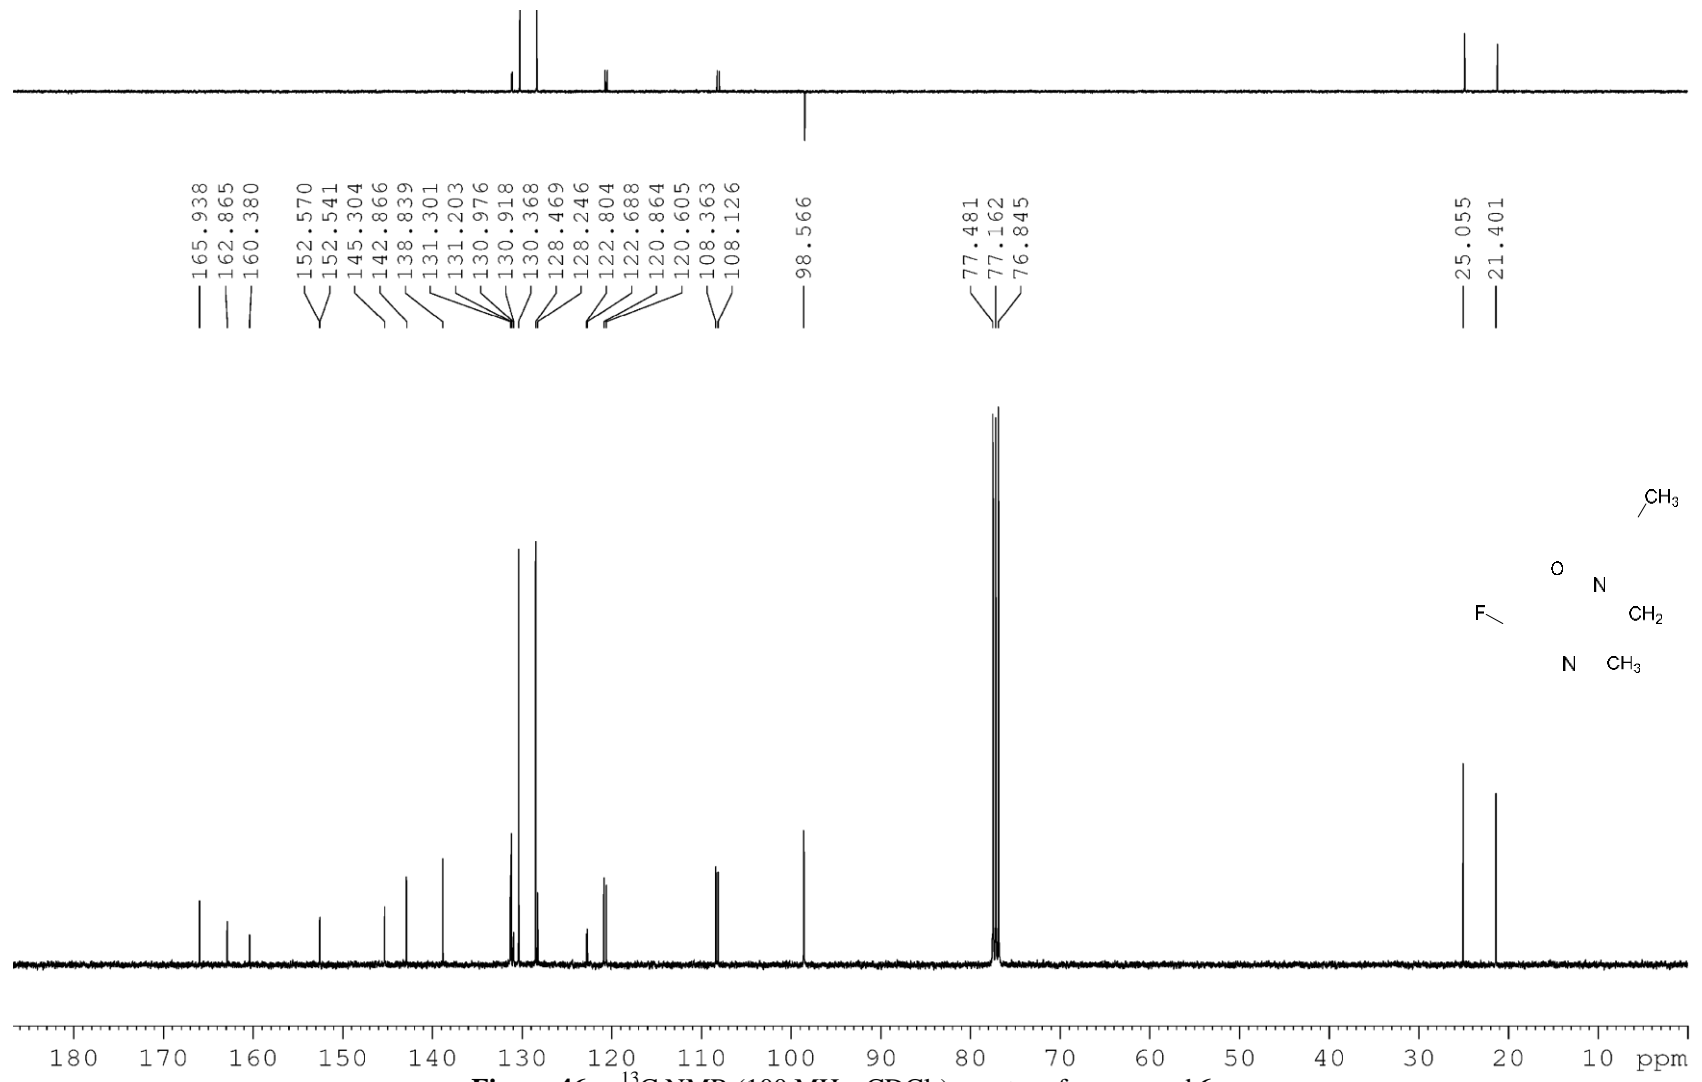

**Figure 46.**  $^{13}\text{C}$  NMR (100 MHz,  $\text{CDCl}_3$ ) spectra of compound **6w**



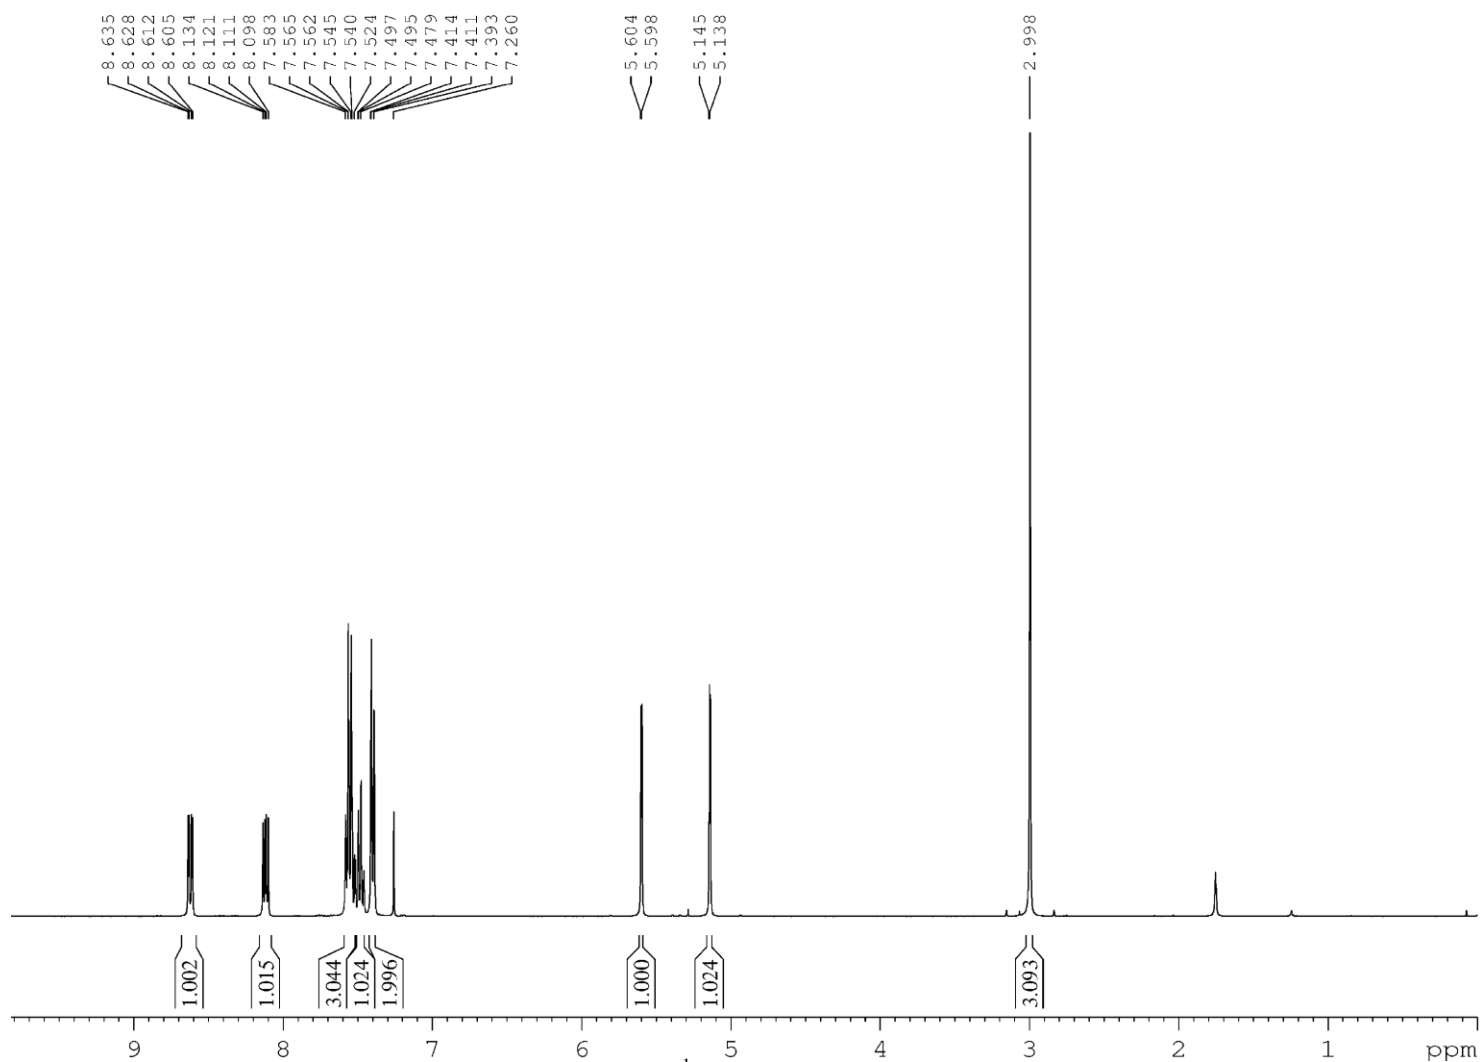

```

NAME      22012000180-3
EXPNO     851
PROCNO    1
Date_     20151018
Time      14.47
INSTRUM   spect
PROBHD    5 mm PABBO BB/
PULPROG   zg30
TD         65536
SOLVENT   CDCl3
NS         8
DS         0
SWH       8012.820 Hz
FIDRES    0.122266 Hz
AQ        4.0894966 se
RC        71.53
DW        62.400 us
DE        6.50 us
TE        0.0 K
D1        1.00000000 se
TD0       1

```

```

===== CHANNEL f1 =====
SFO1     400.1522008 MH
NUC1     1H
P1       10.62 us
SI       65536
SF       400.1500094 MH
WDW      EM
SSB      0
LB       0.30 Hz
GB       0
PC       1.00

```

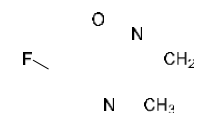

Figure 47. <sup>1</sup>H NMR (400 MHz, CDCl<sub>3</sub>) spectra of compound 6x

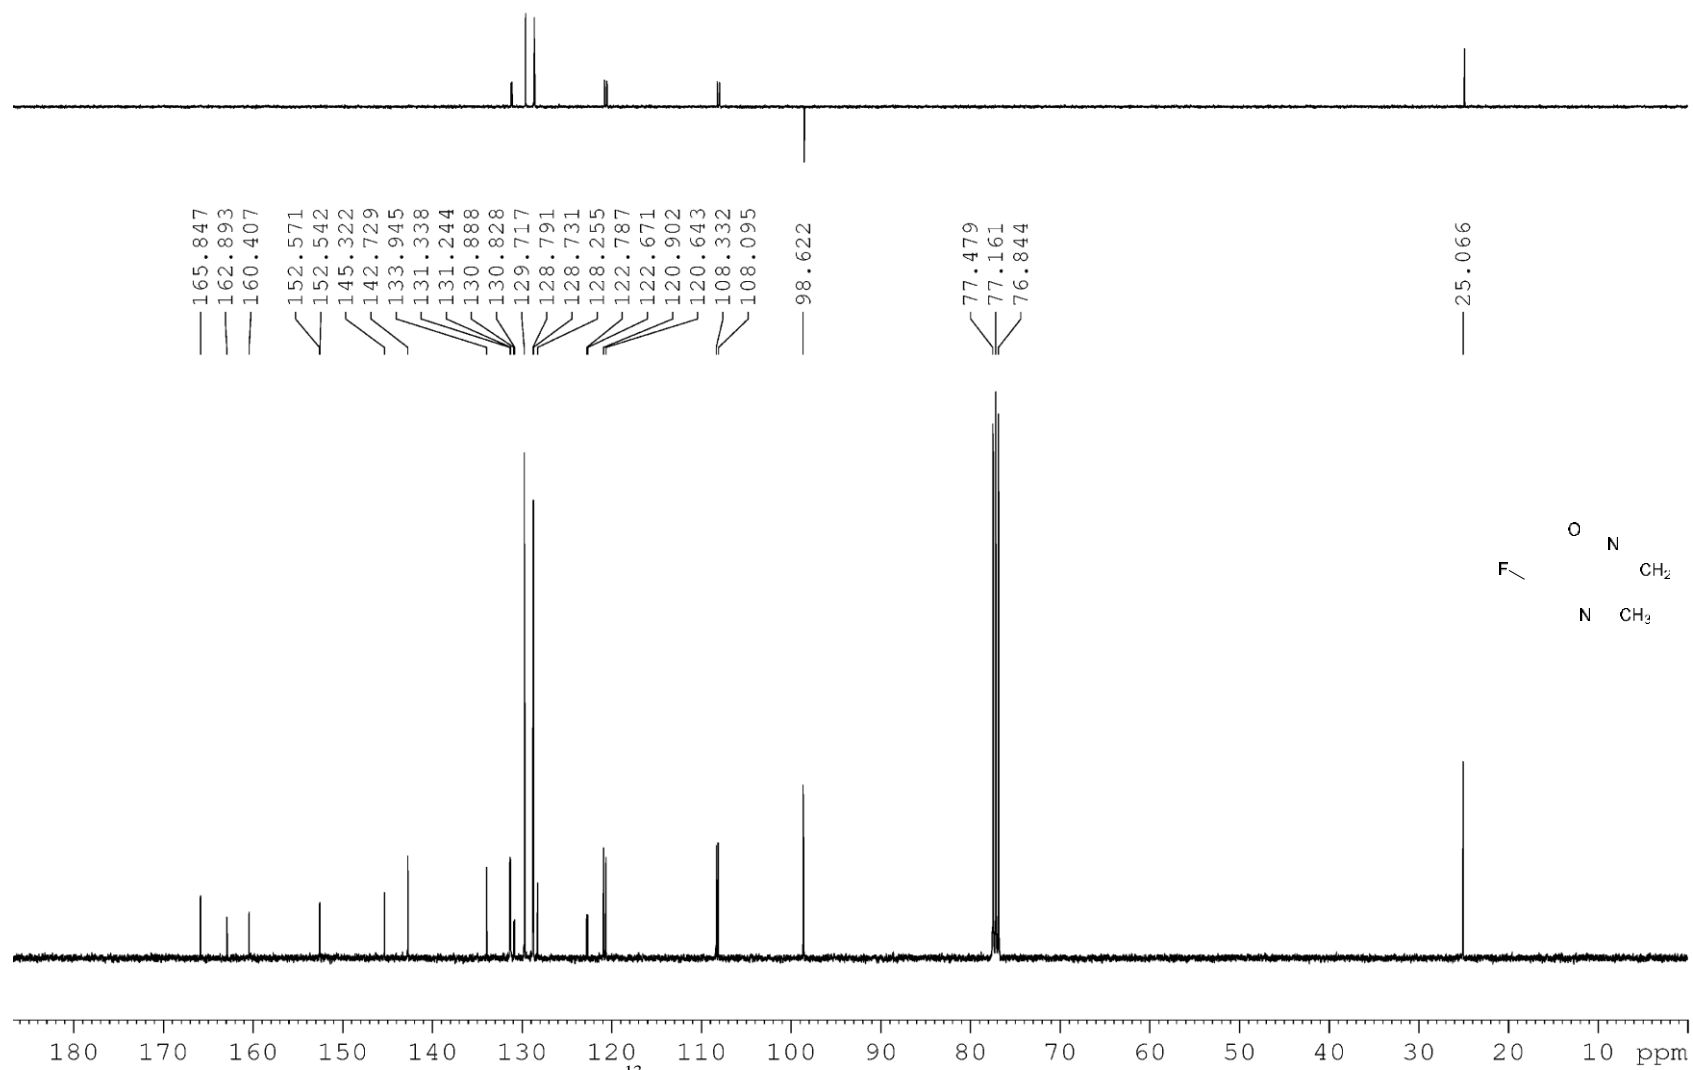

**Figure 48.**  $^{13}\text{C}$  NMR (100 MHz,  $\text{CDCl}_3$ ) spectra of compound **6x**

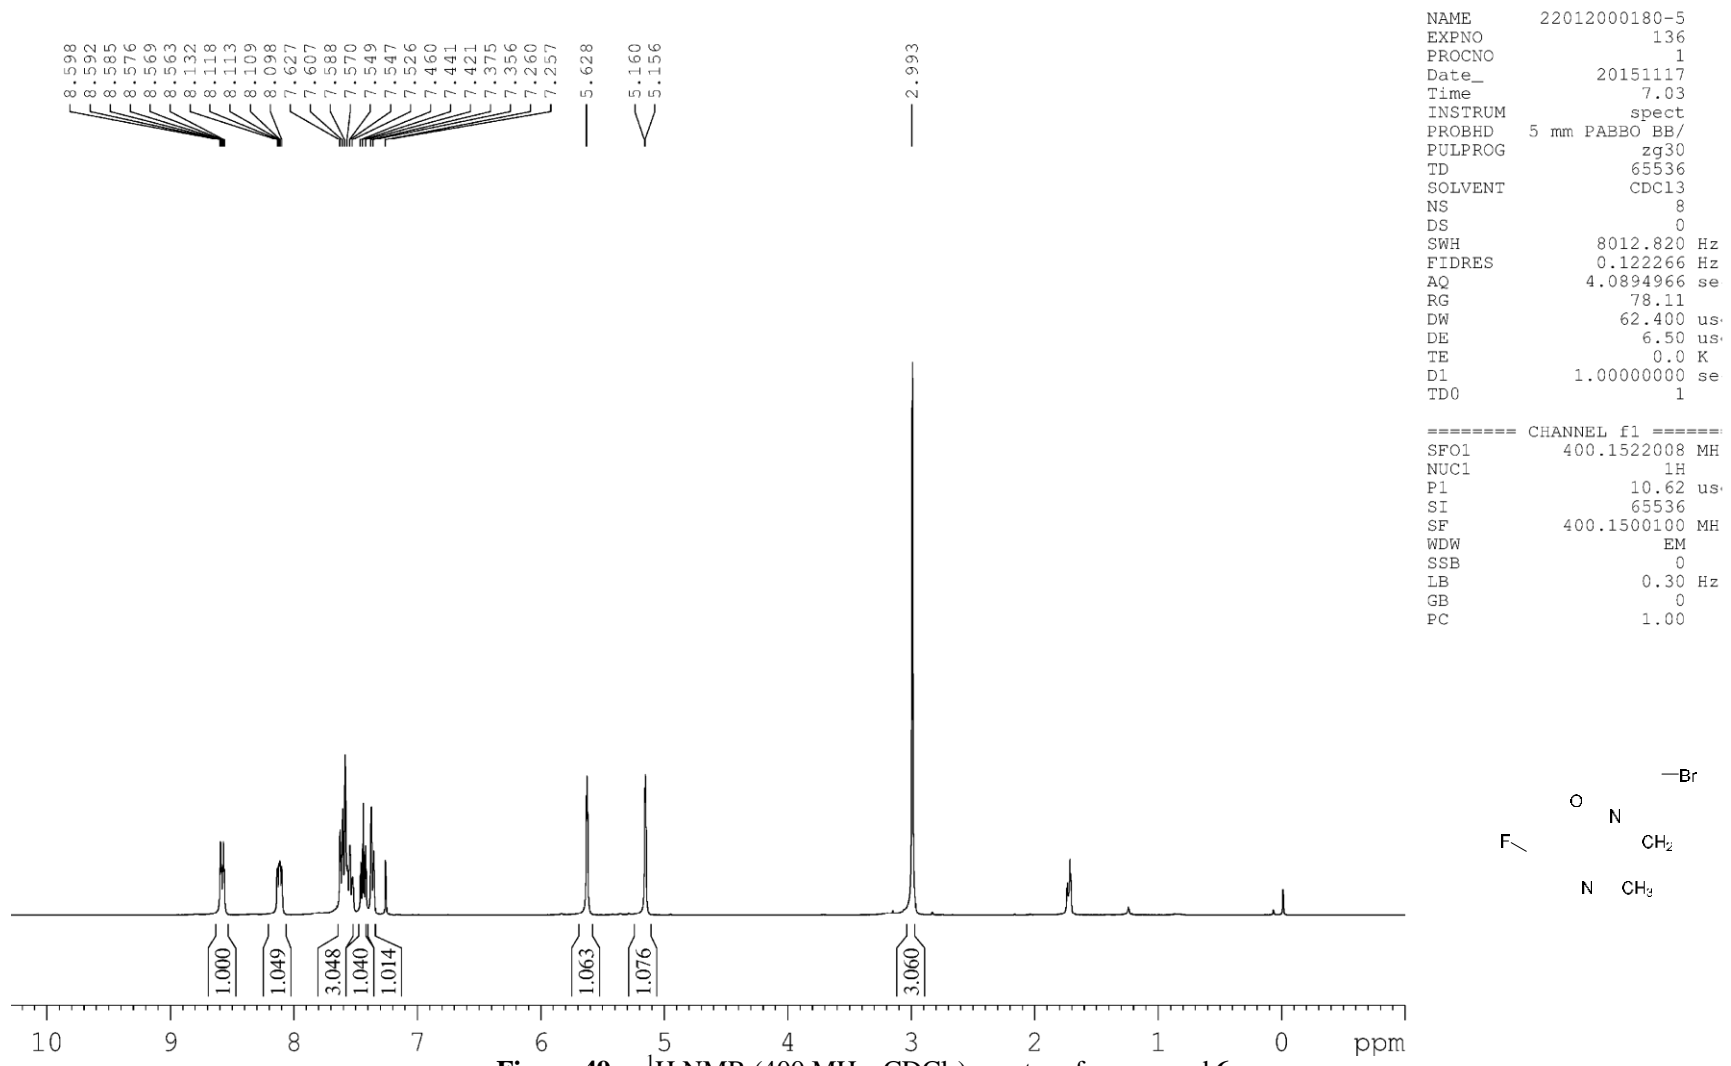

Figure 49. <sup>1</sup>H NMR (400 MHz, CDCl<sub>3</sub>) spectra of compound **6y**

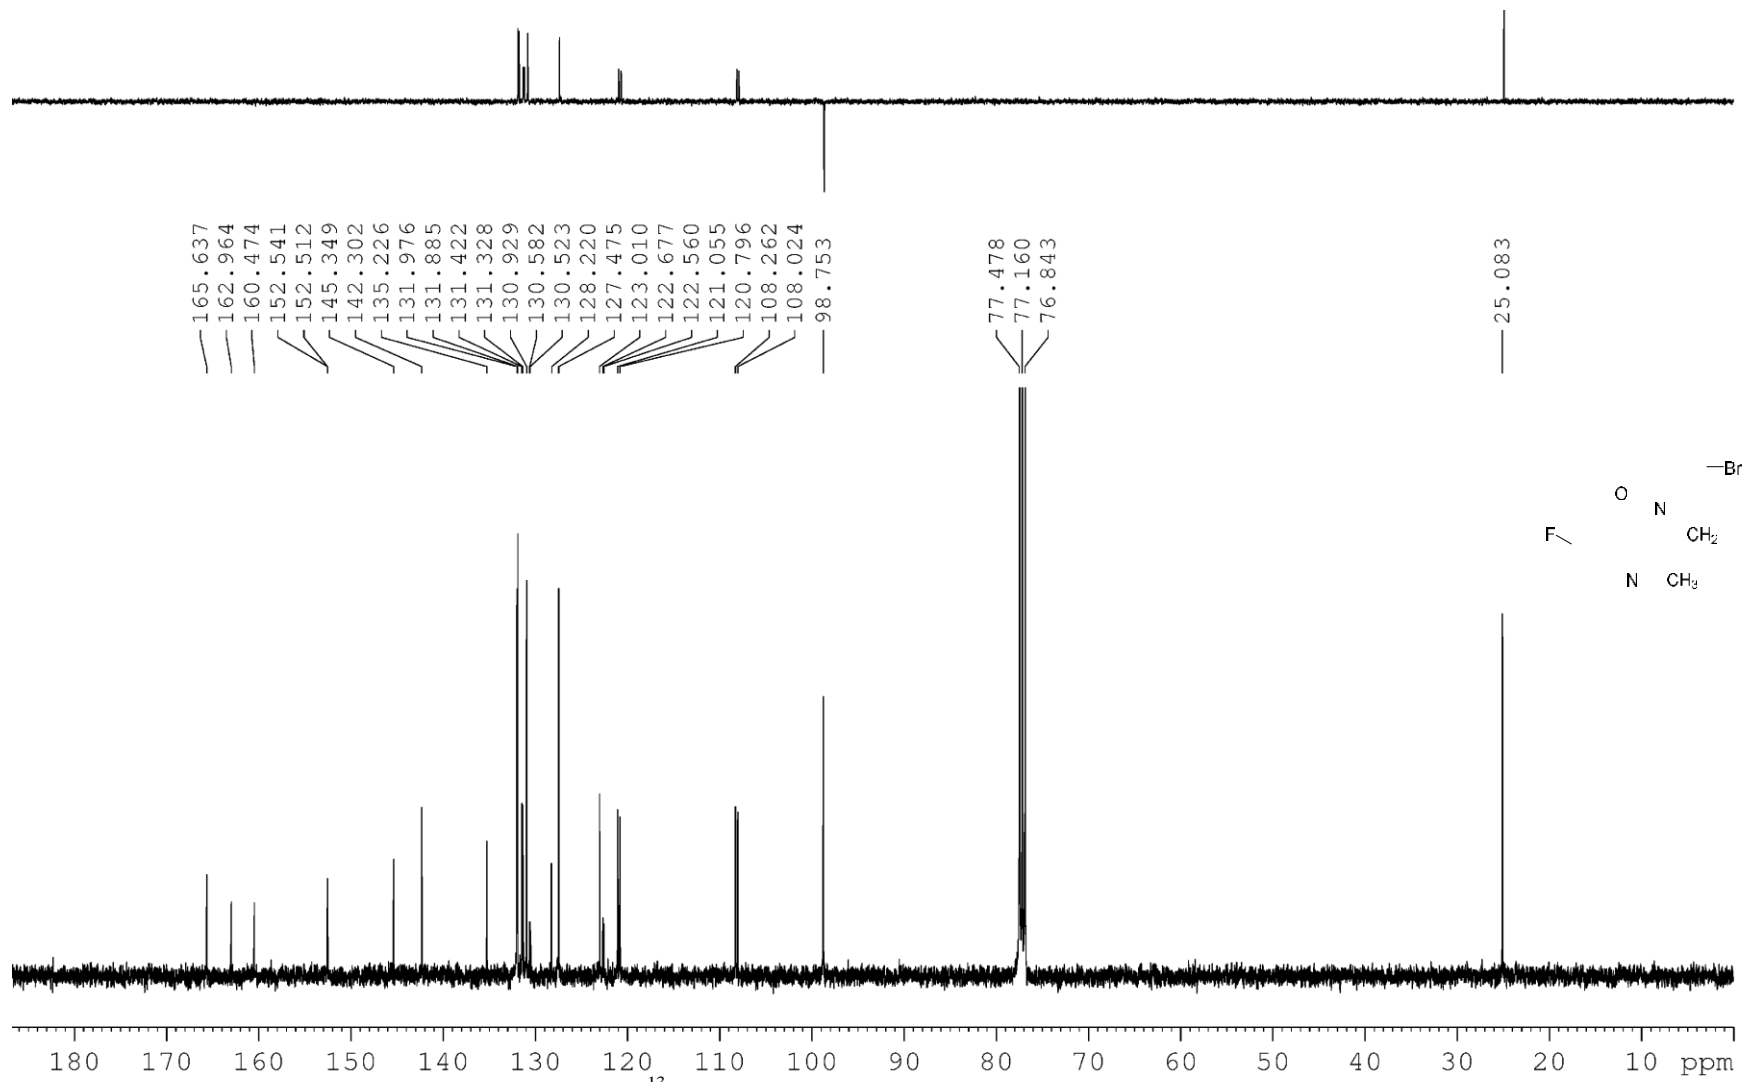

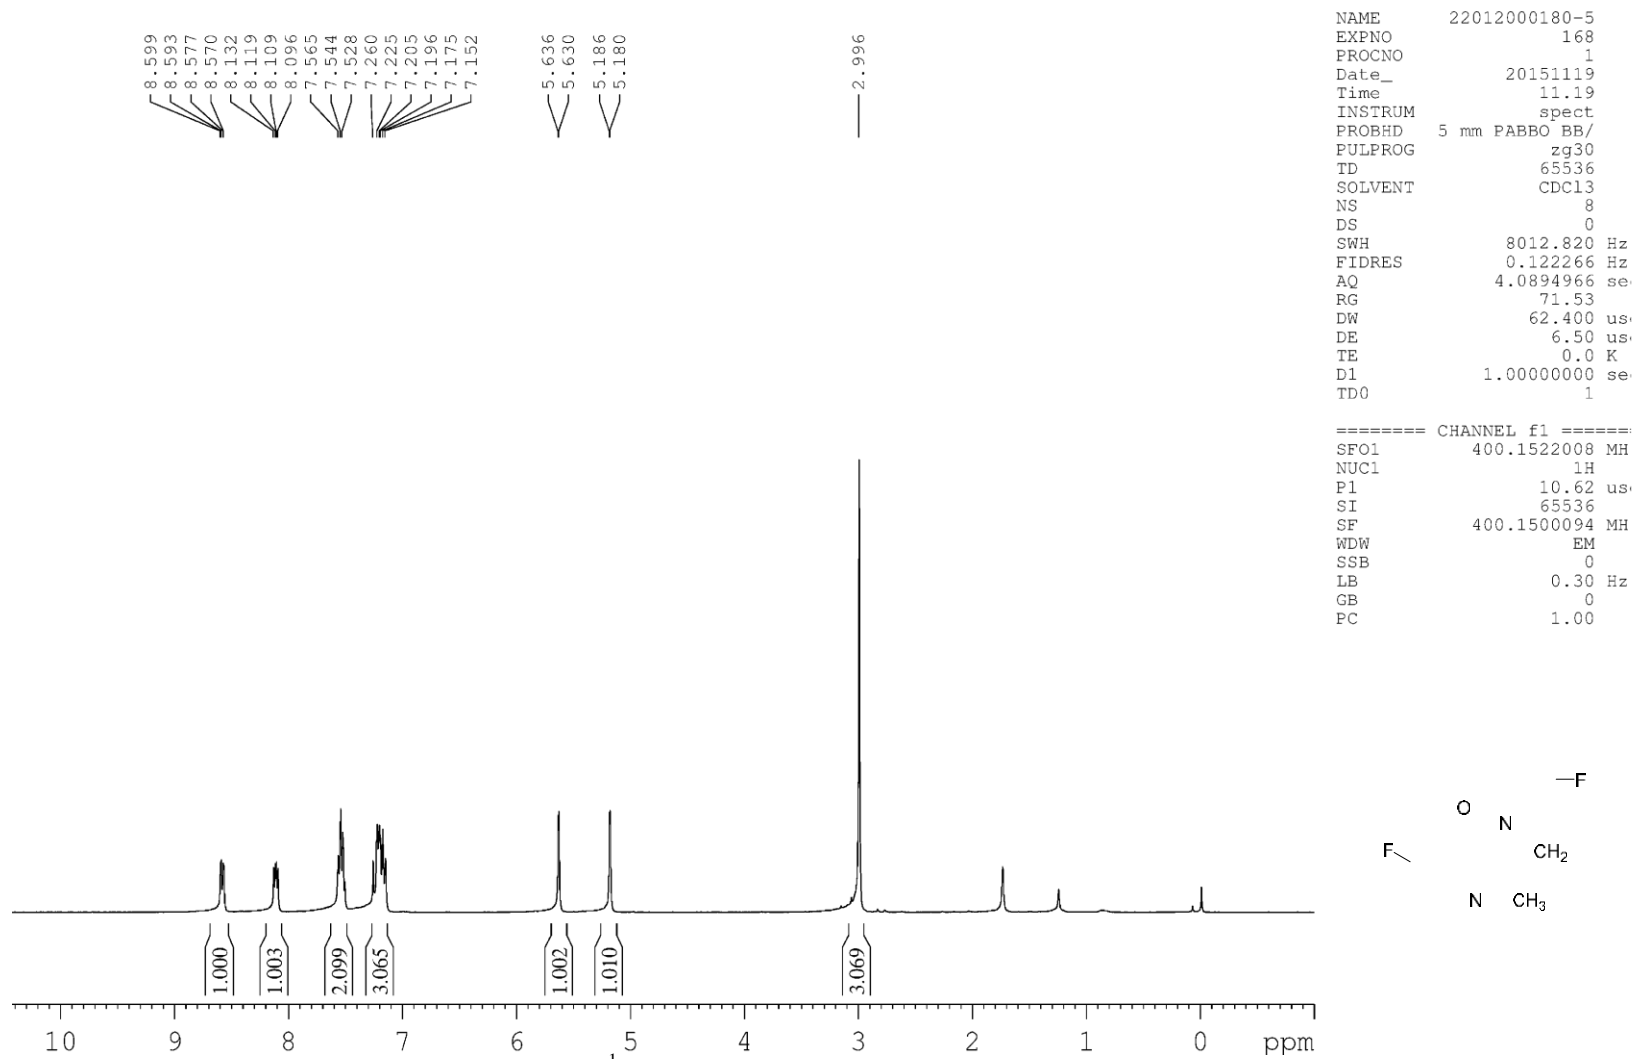

Figure 51. <sup>1</sup>H NMR (400 MHz, CDCl<sub>3</sub>) spectra of compound **6z**

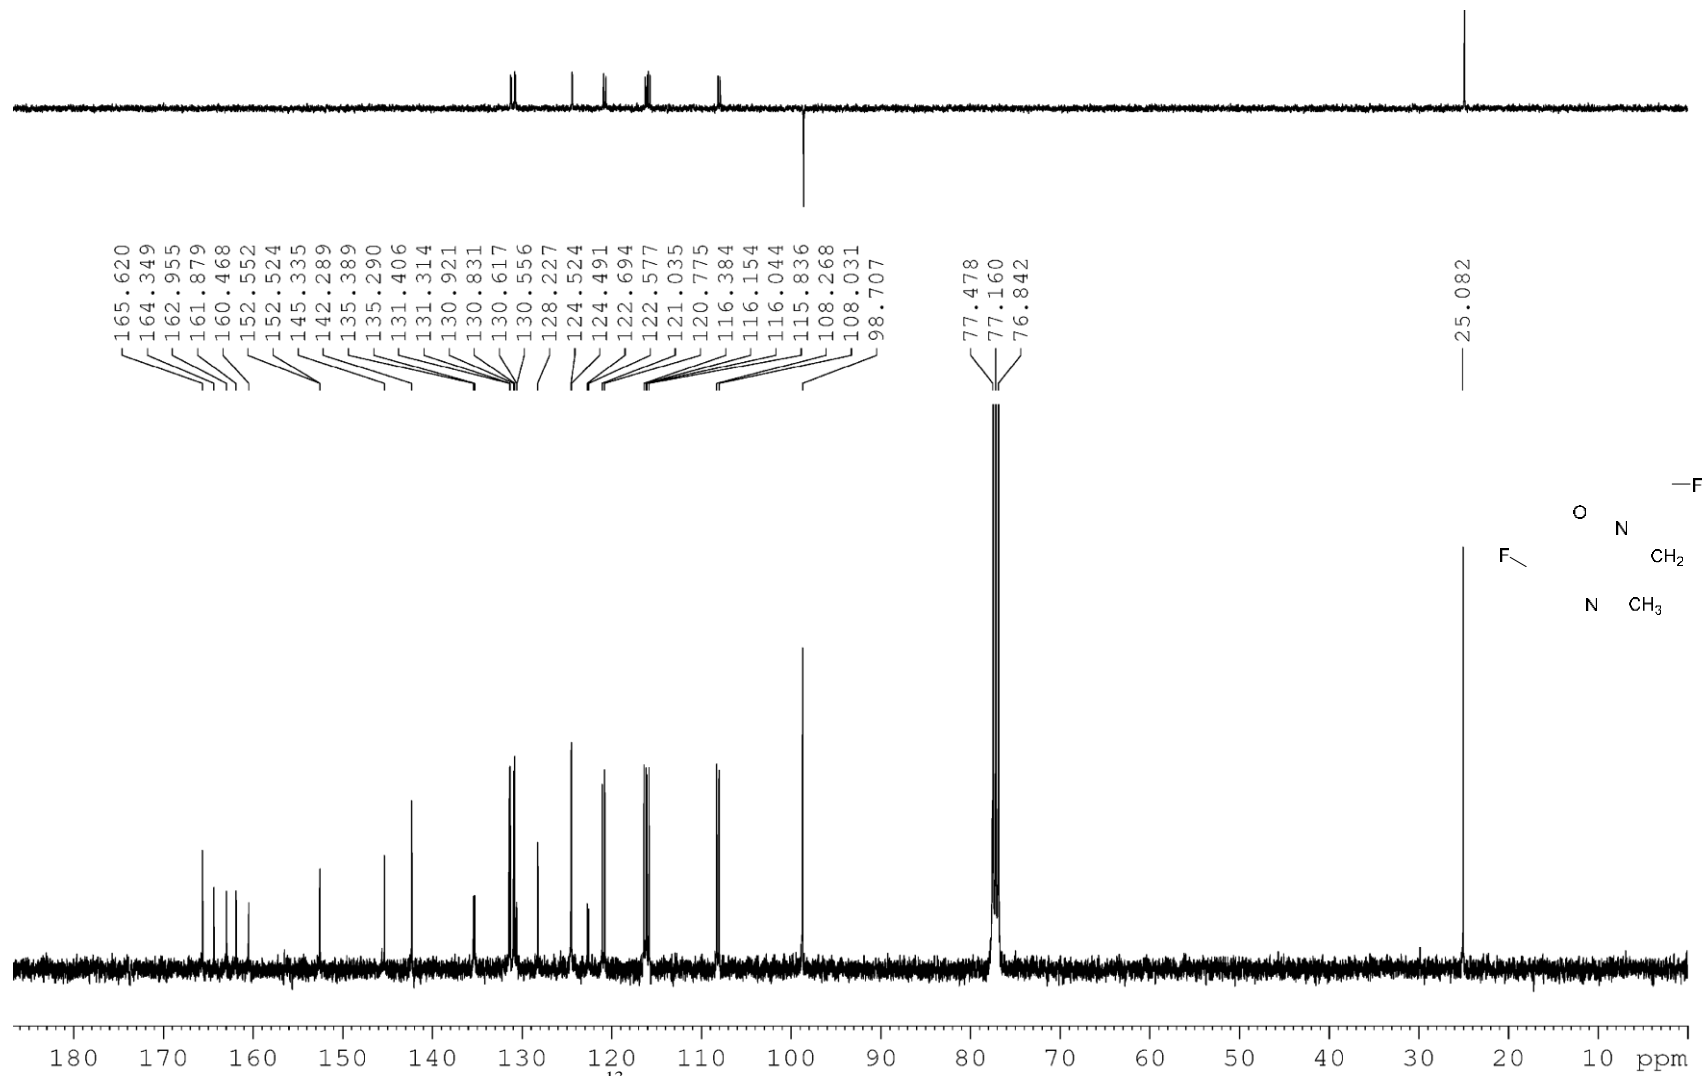

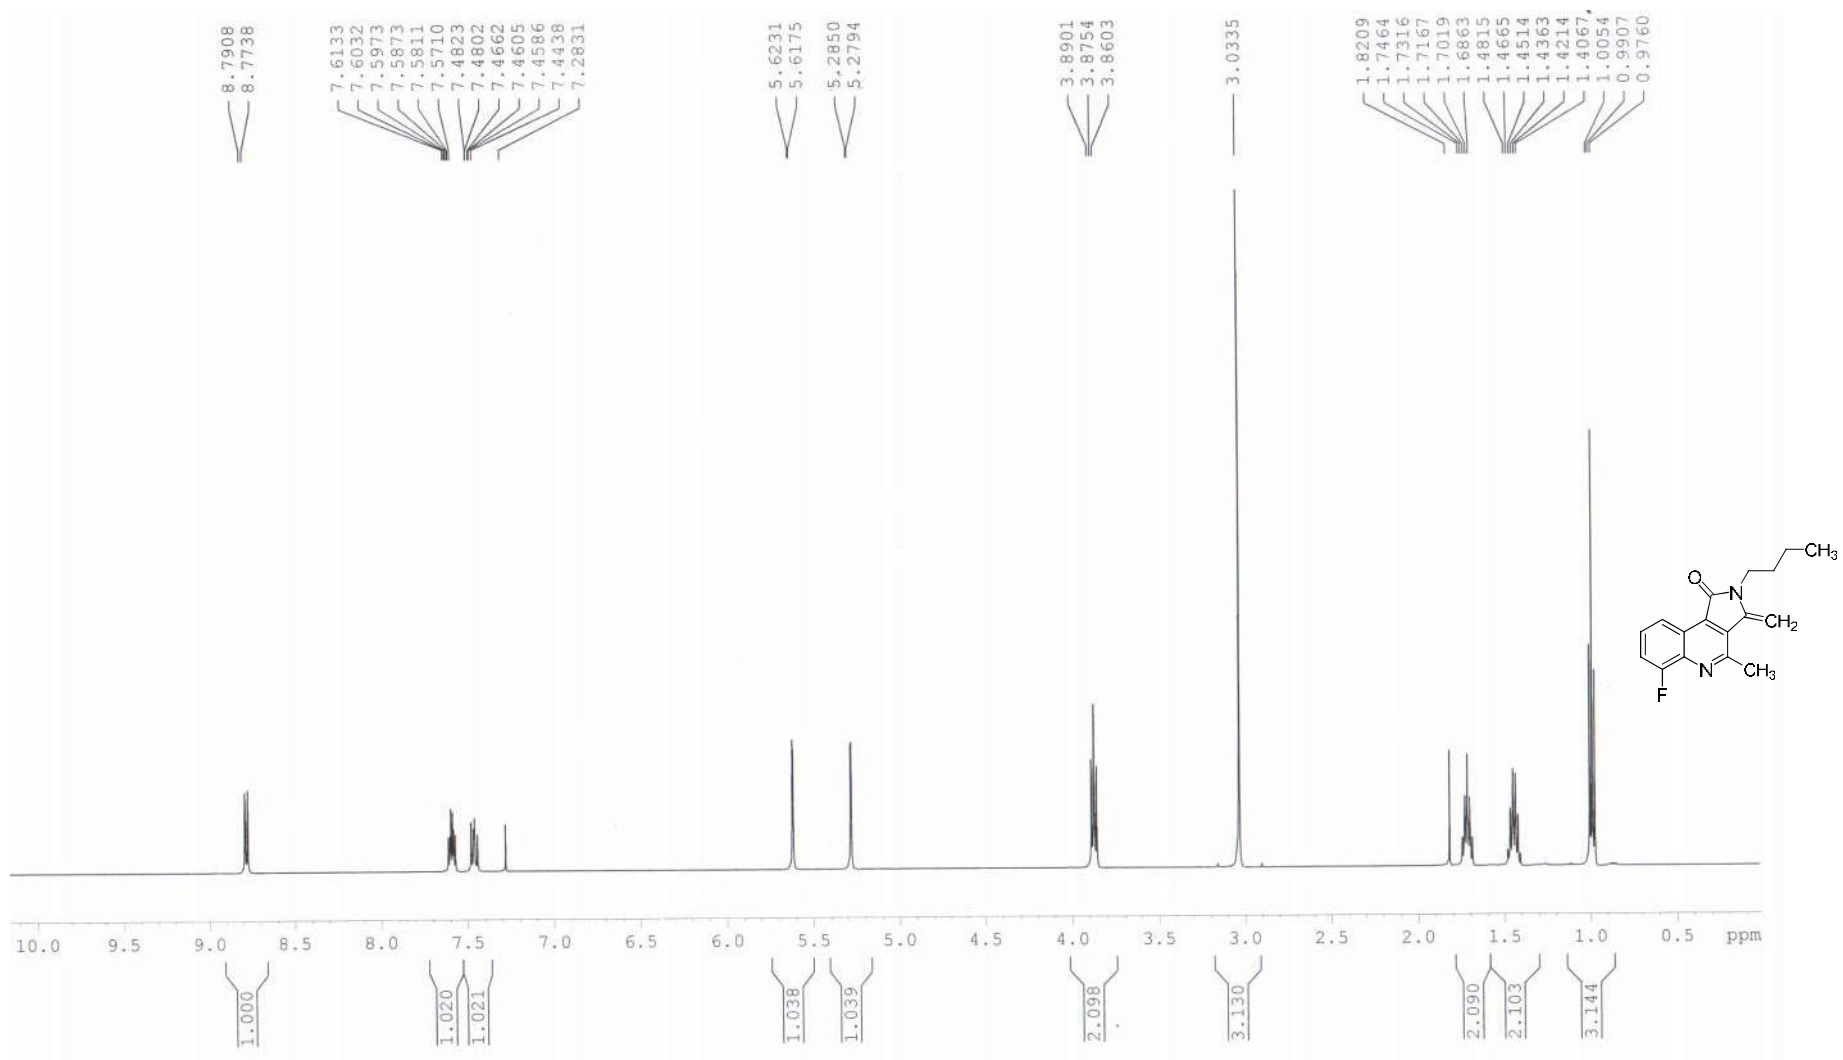

Figure 53. <sup>1</sup>H NMR (500 MHz, CDCl<sub>3</sub>) spectra of compound 6a'

DEPT135

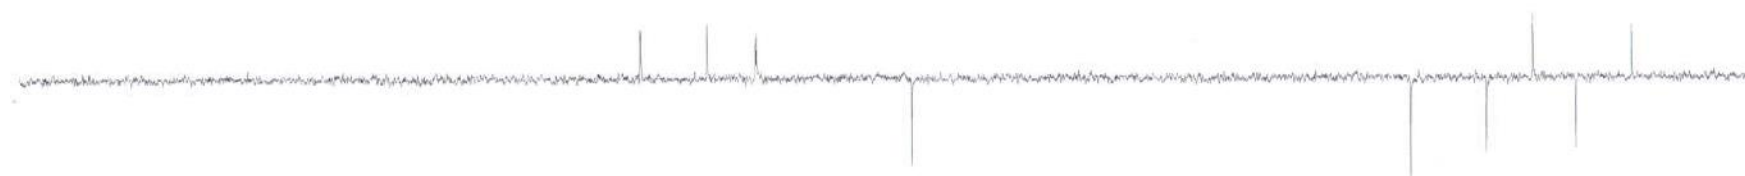

YUNNAN UNIVERSITY AV. DRX 500  
yufuchao XH-92 in CDCl<sub>3</sub>  
16052603

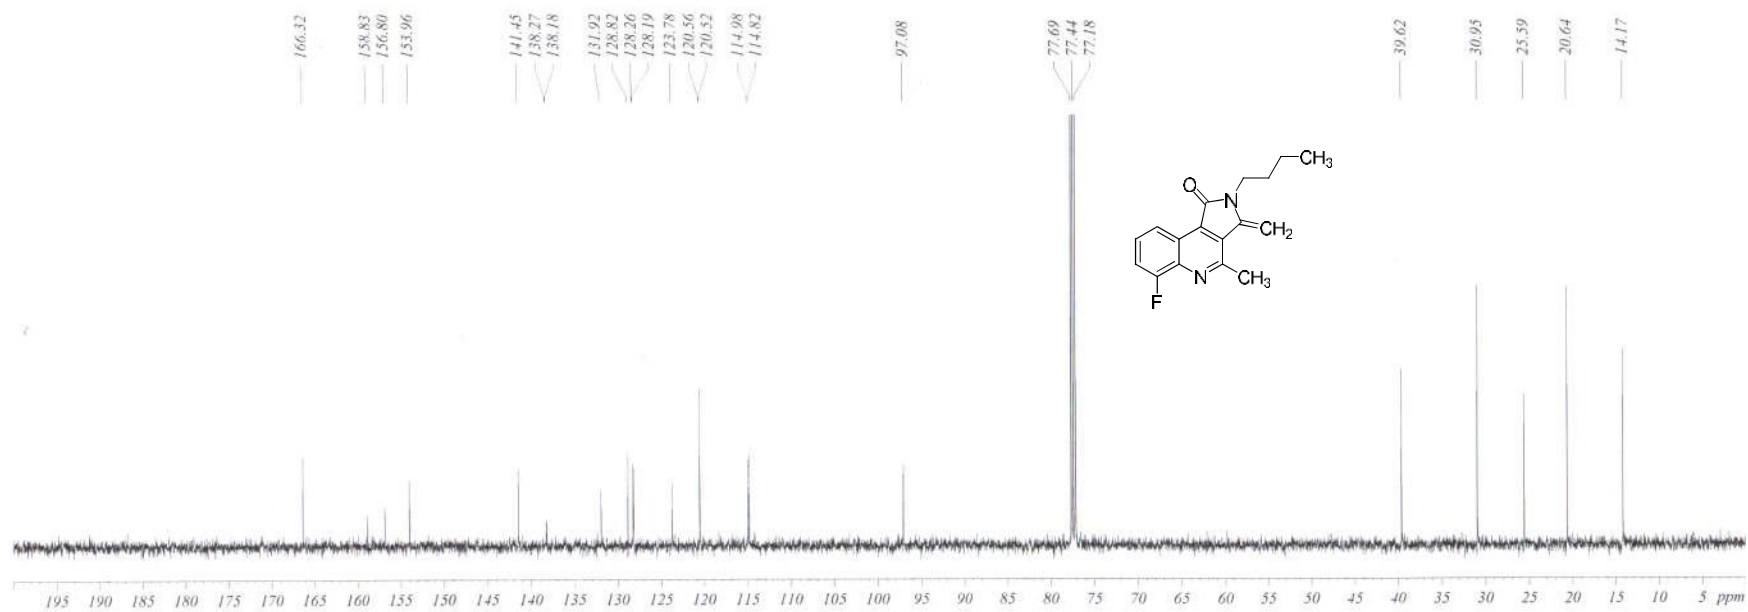

Figure 54. <sup>13</sup>C NMR (125 MHz, CDCl<sub>3</sub>) spectra of compound 6a'



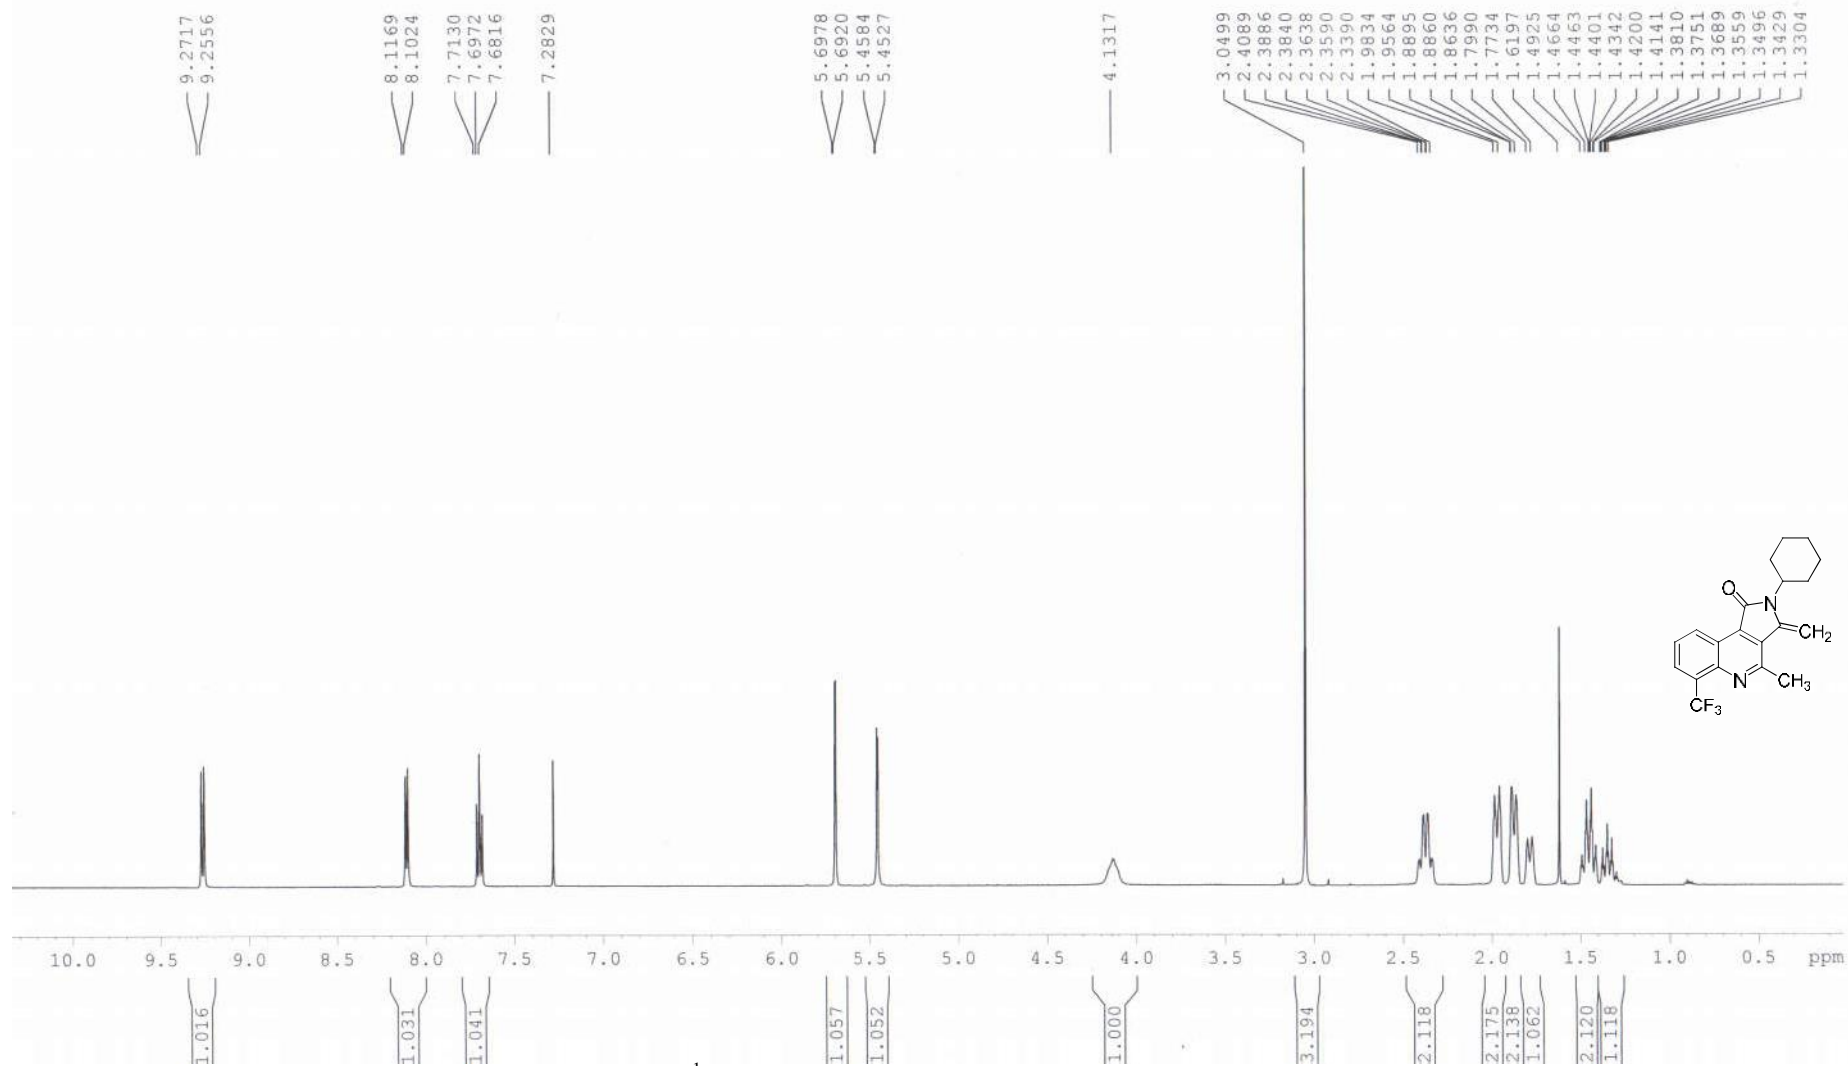

Figure 55. <sup>1</sup>H NMR (500 MHz, CDCl<sub>3</sub>) spectra of compound 6b'

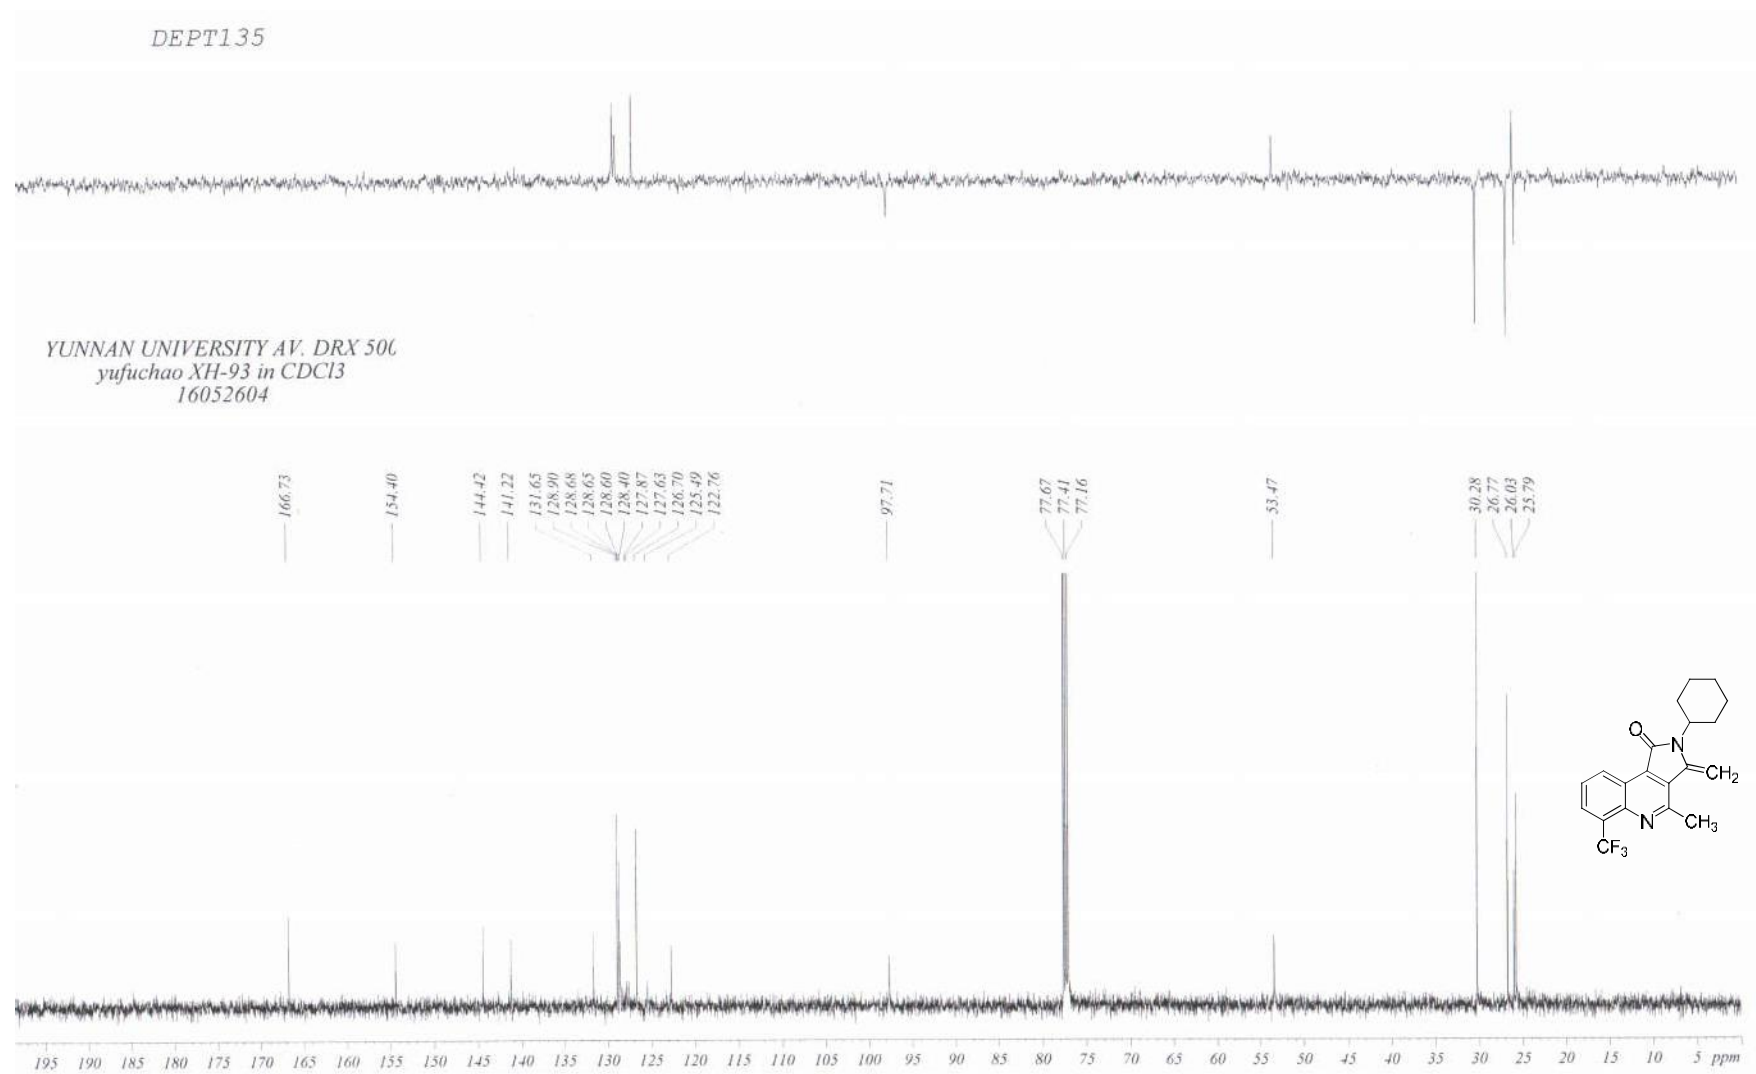

Figure 56. <sup>13</sup>C NMR (125 MHz, CDCl<sub>3</sub>) spectra of compound 6b'

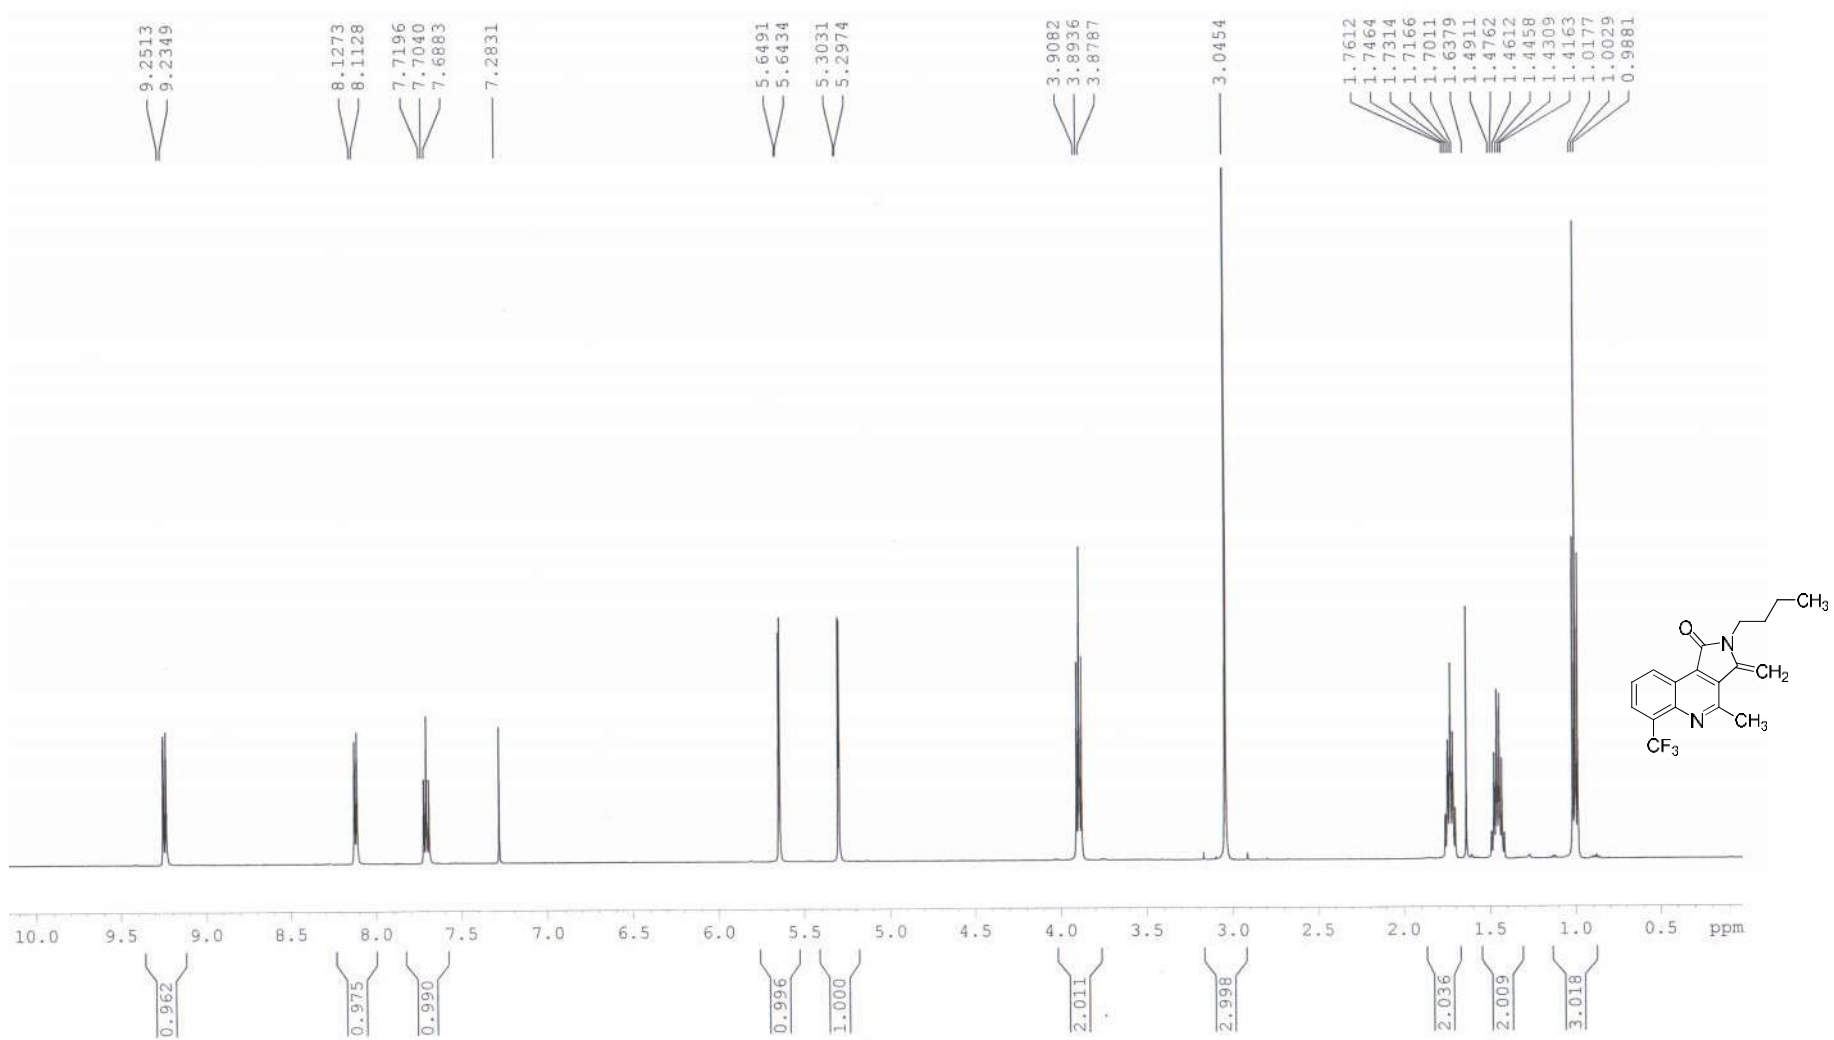

**Figure 57.**  $^1\text{H}$  NMR (500 MHz,  $\text{CDCl}_3$ ) spectra of compound **6c'**

DEPT135

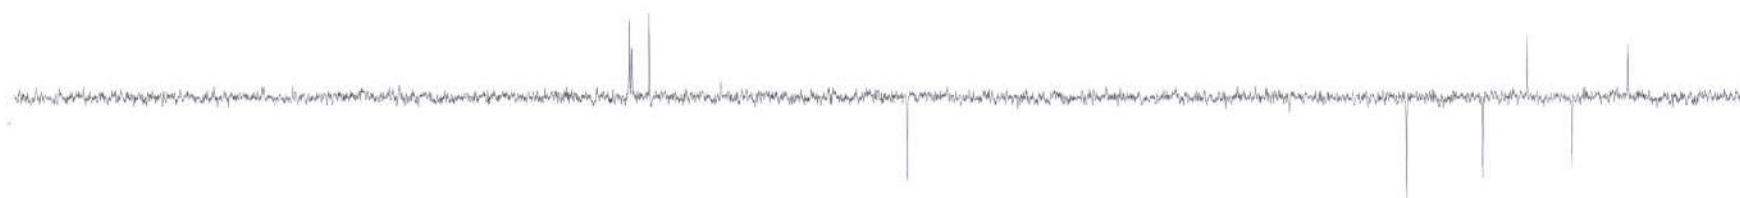

YUNNAN UNIVERSITY AV. DRX 500  
yufuchao XH-94 in CDCl<sub>3</sub>  
16052605

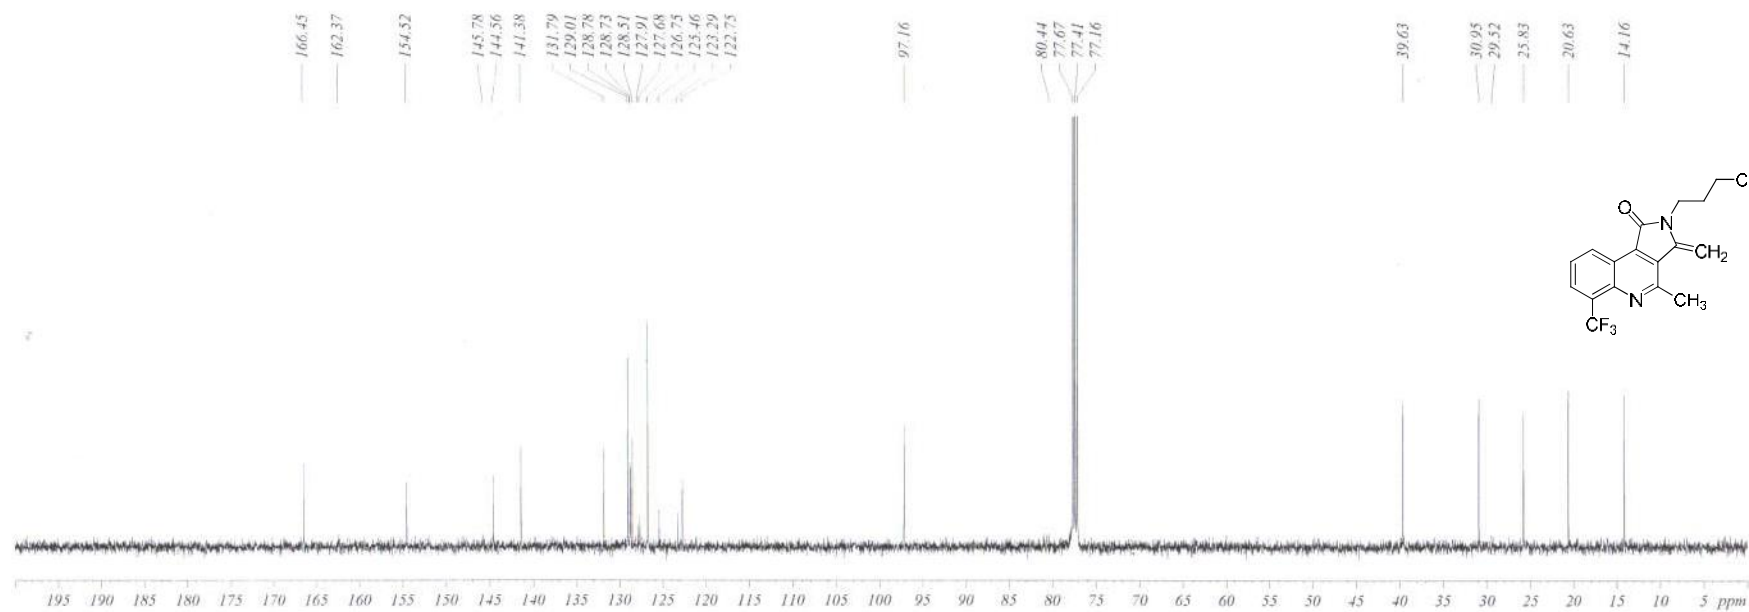

Figure 58. <sup>13</sup>C NMR (125 MHz, CDCl<sub>3</sub>) spectra of compound 6c'

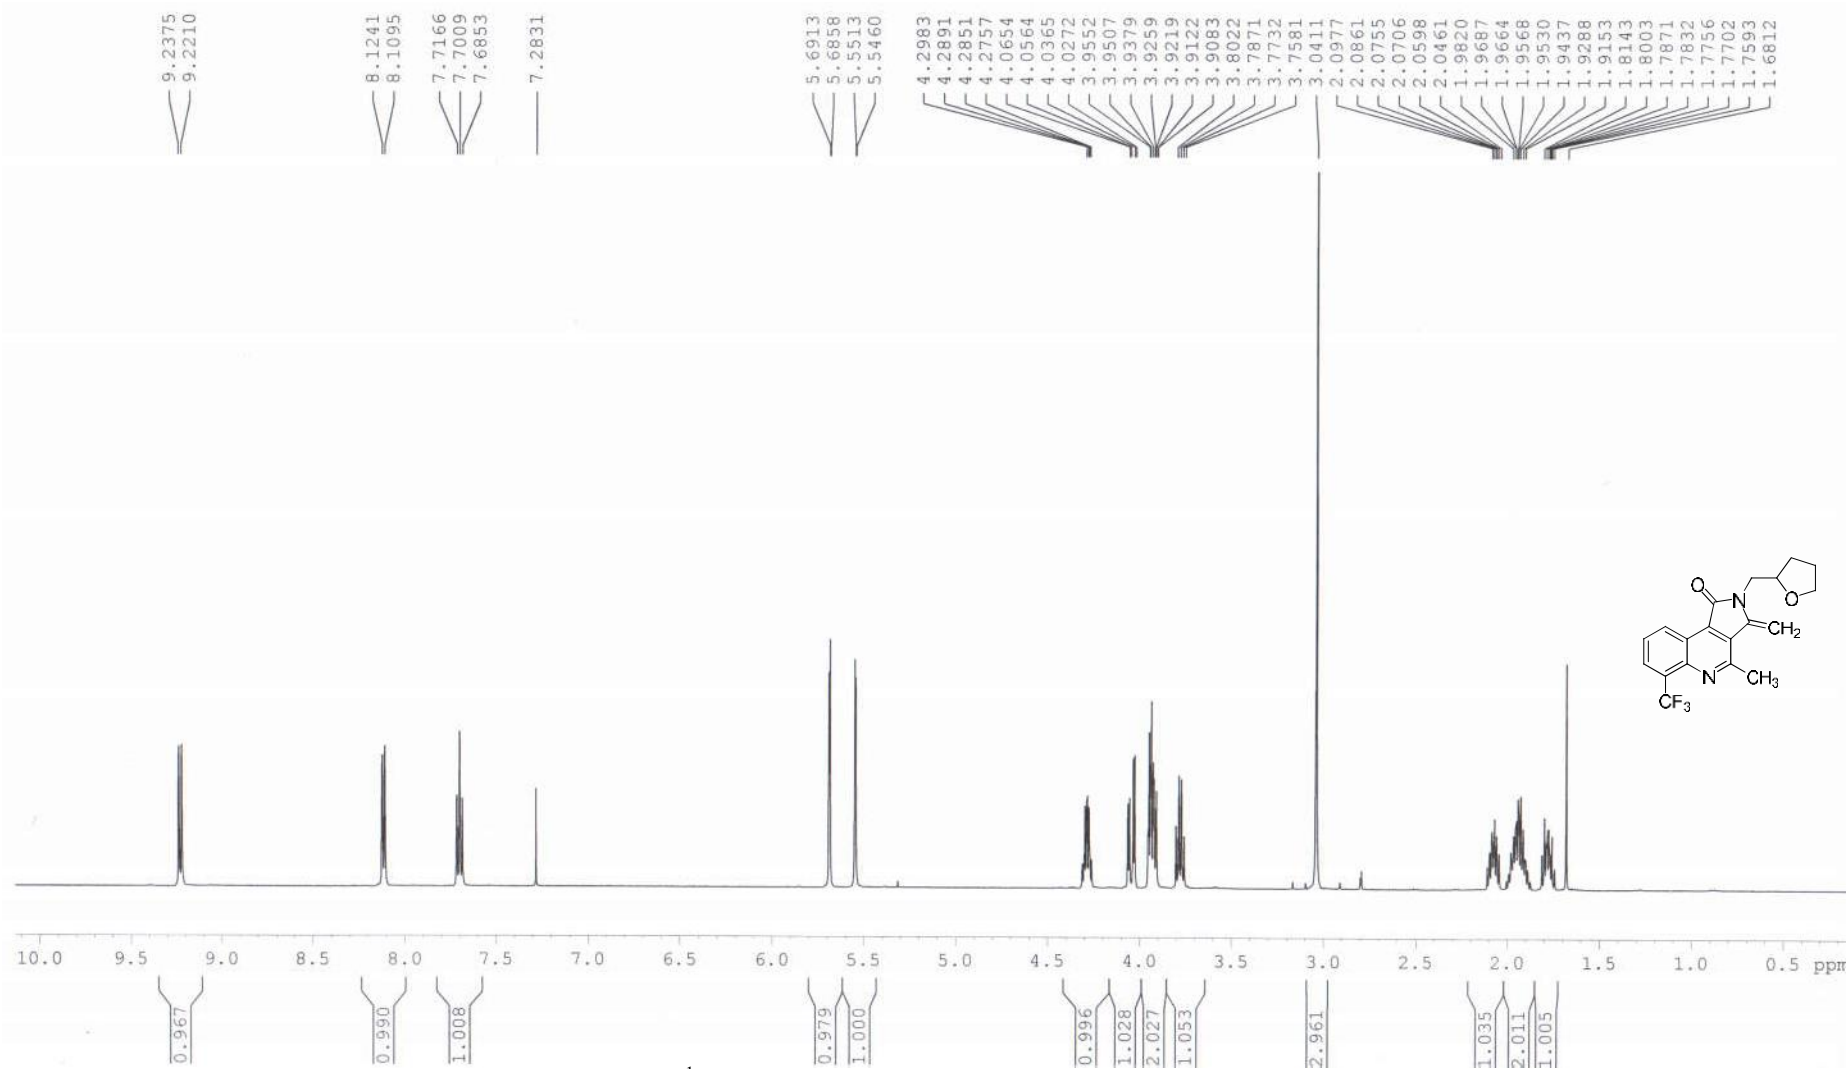

Figure 59. <sup>1</sup>H NMR (500 MHz, CDCl<sub>3</sub>) spectra of compound 6d'

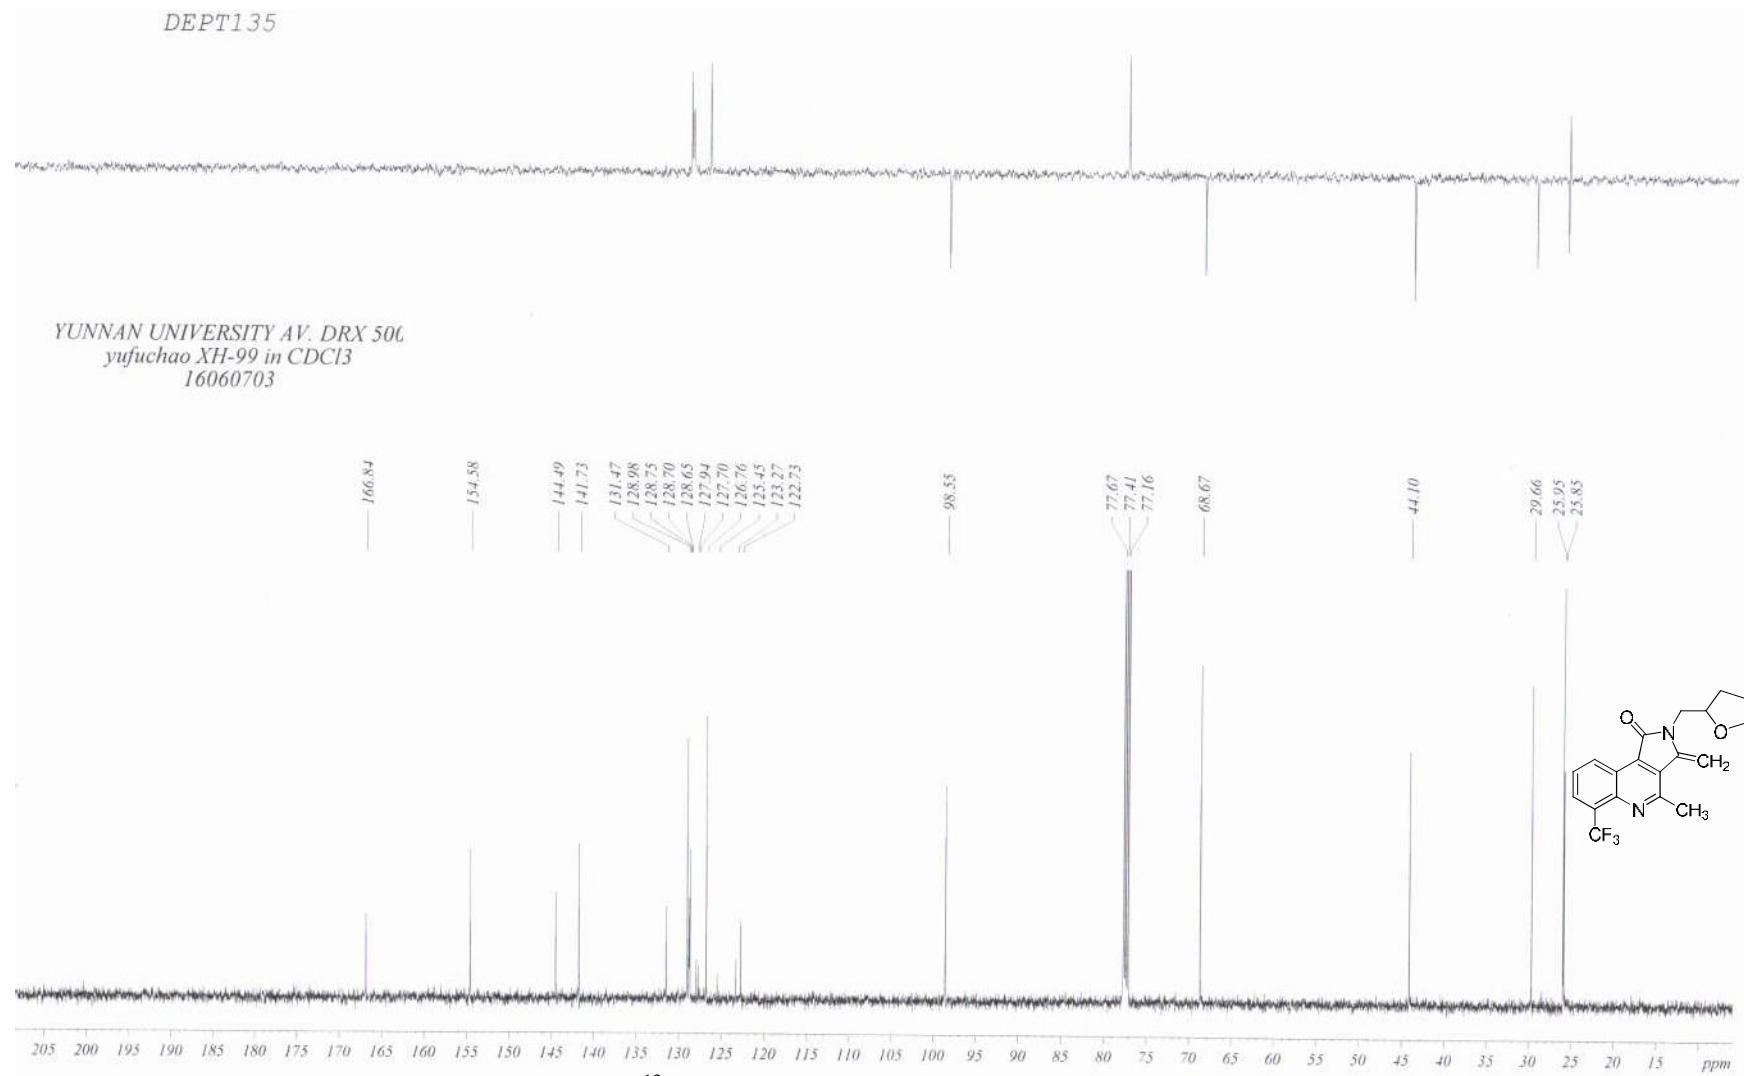

Figure 60. <sup>13</sup>C NMR (125 MHz, CDCl<sub>3</sub>) spectra of compound 6d'

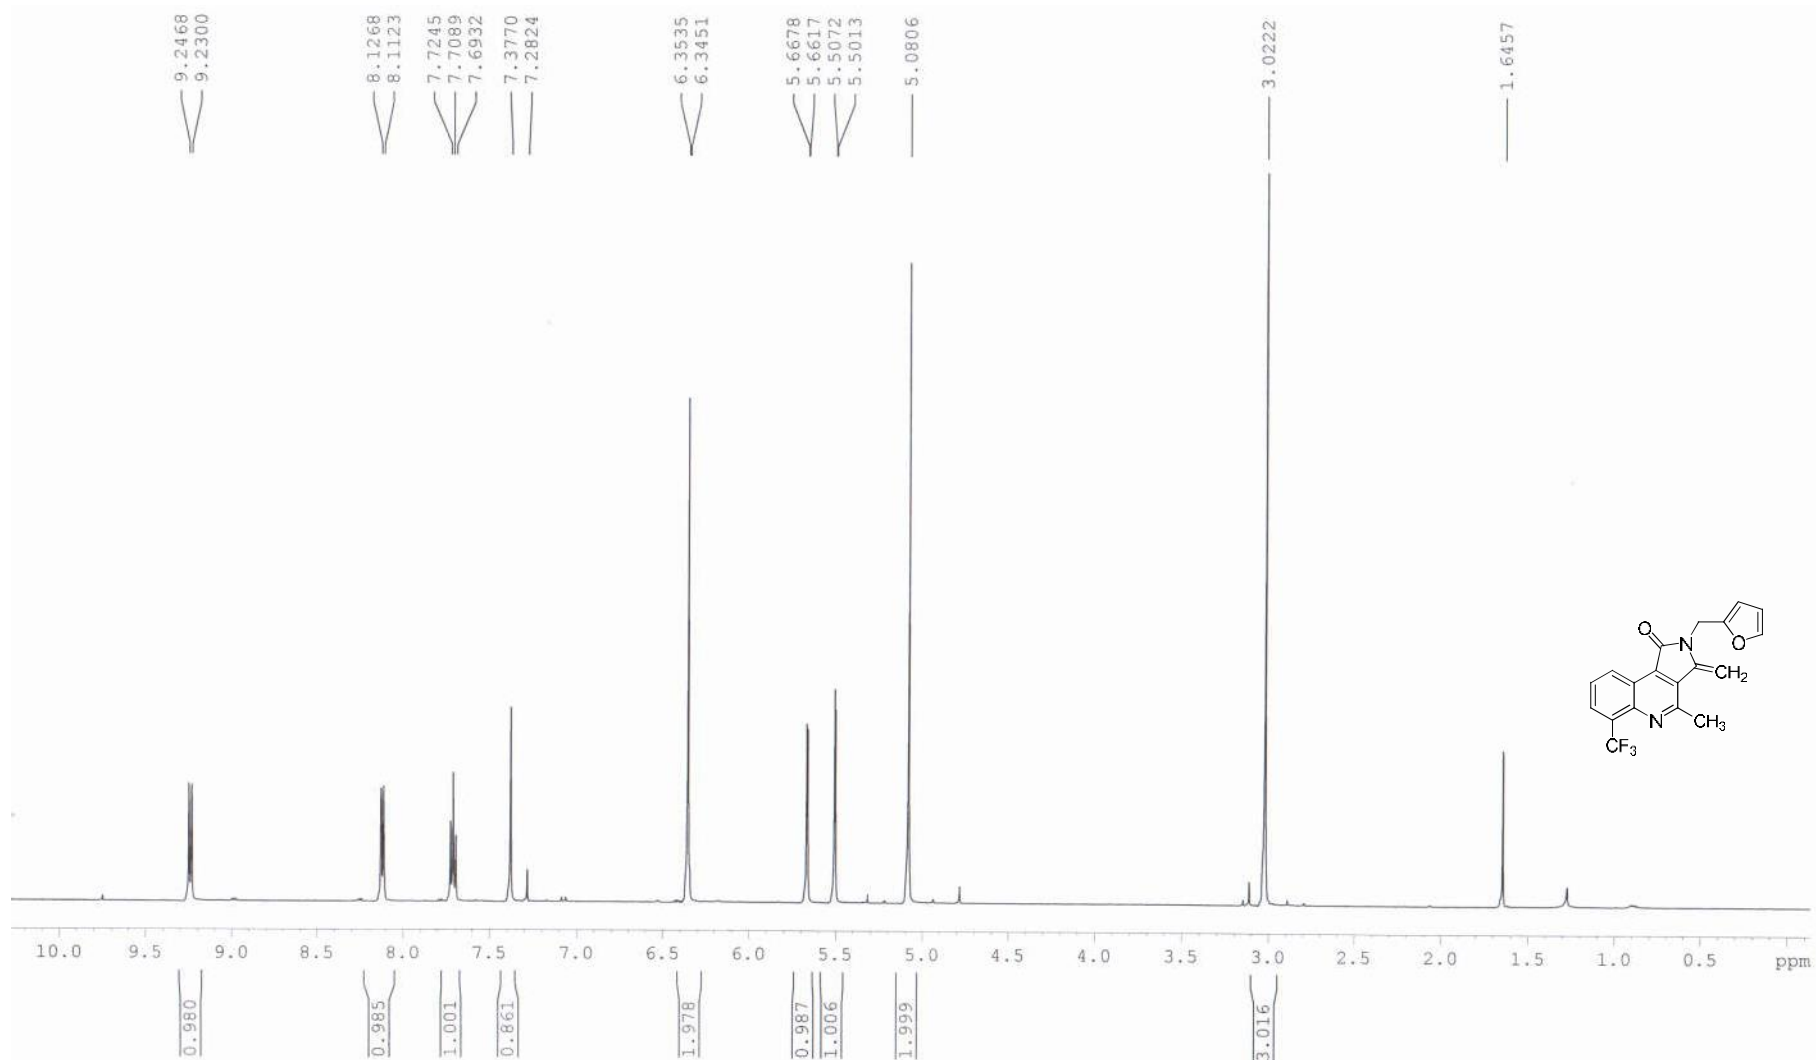

**Figure 61.**  $^1\text{H}$  NMR (500 MHz,  $\text{CDCl}_3$ ) spectra of compound **6e'**

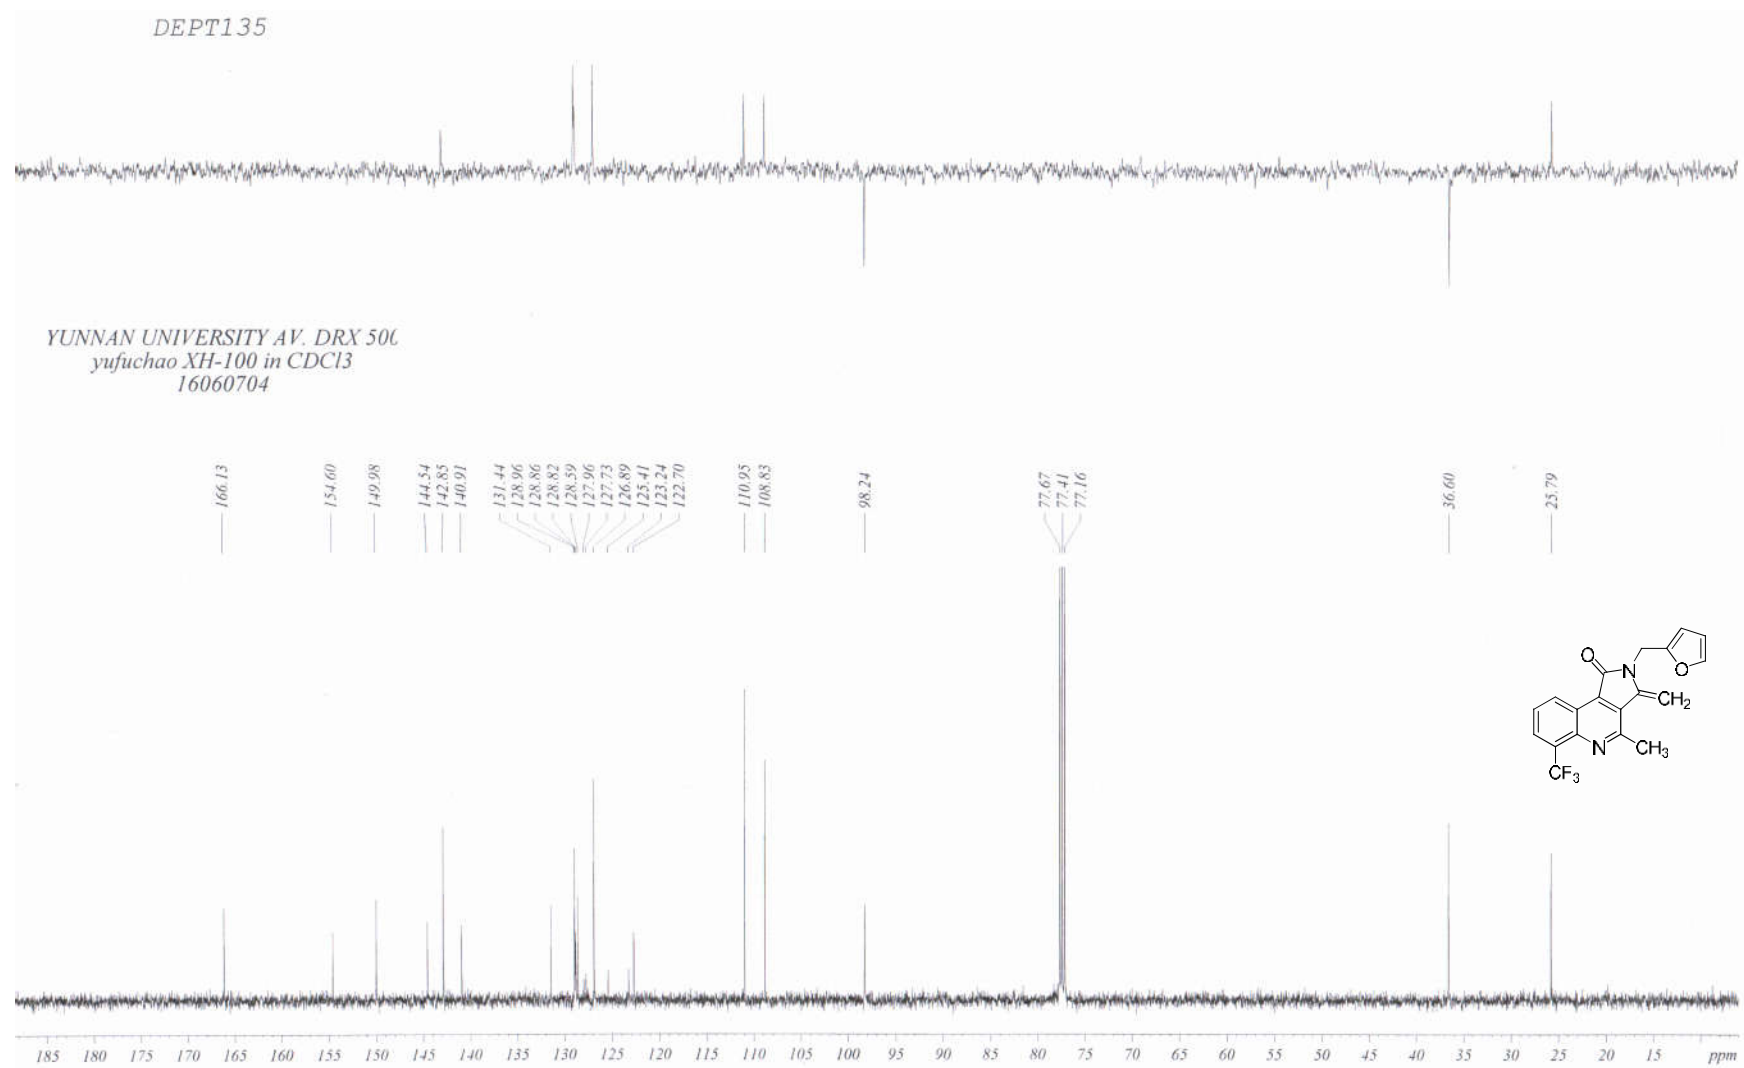

Figure 62. <sup>13</sup>C NMR (125 MHz, CDCl<sub>3</sub>) spectra of compound 6e'



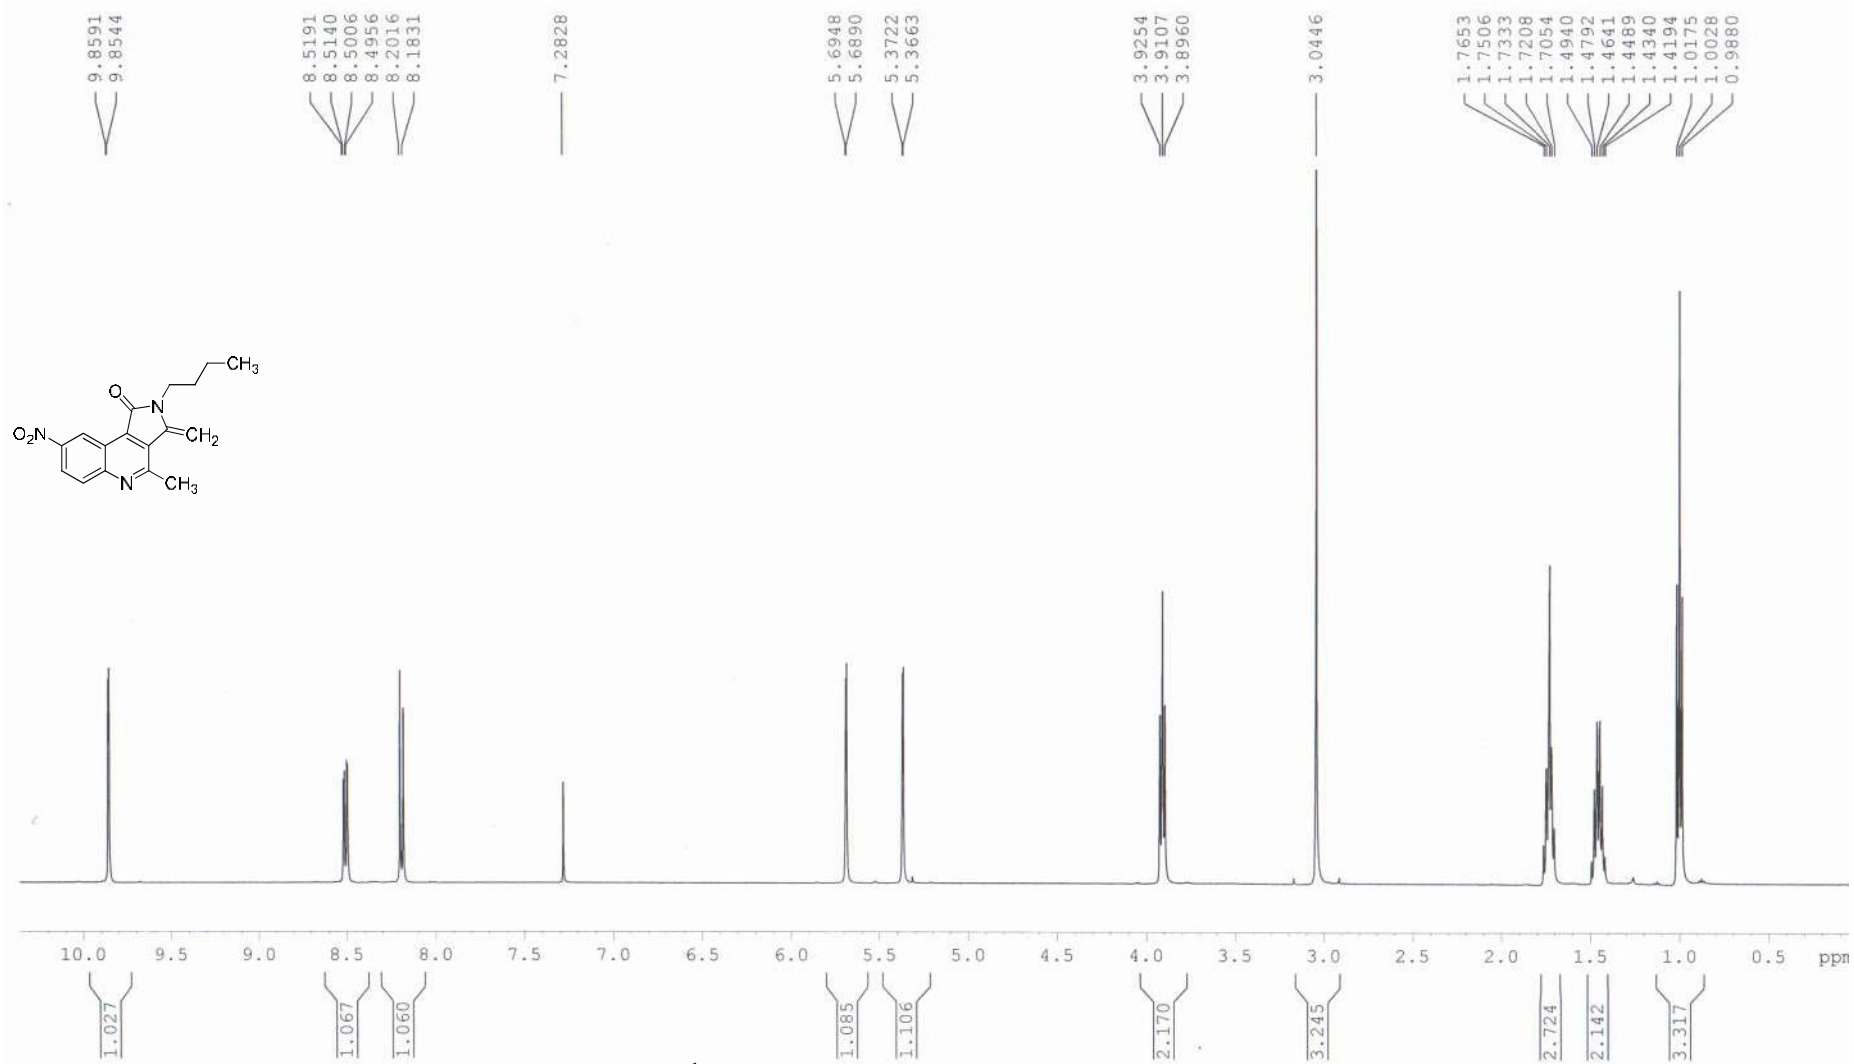

**Figure 63.** <sup>1</sup>H NMR (500 MHz, CDCl<sub>3</sub>) spectra of compound **6f'**

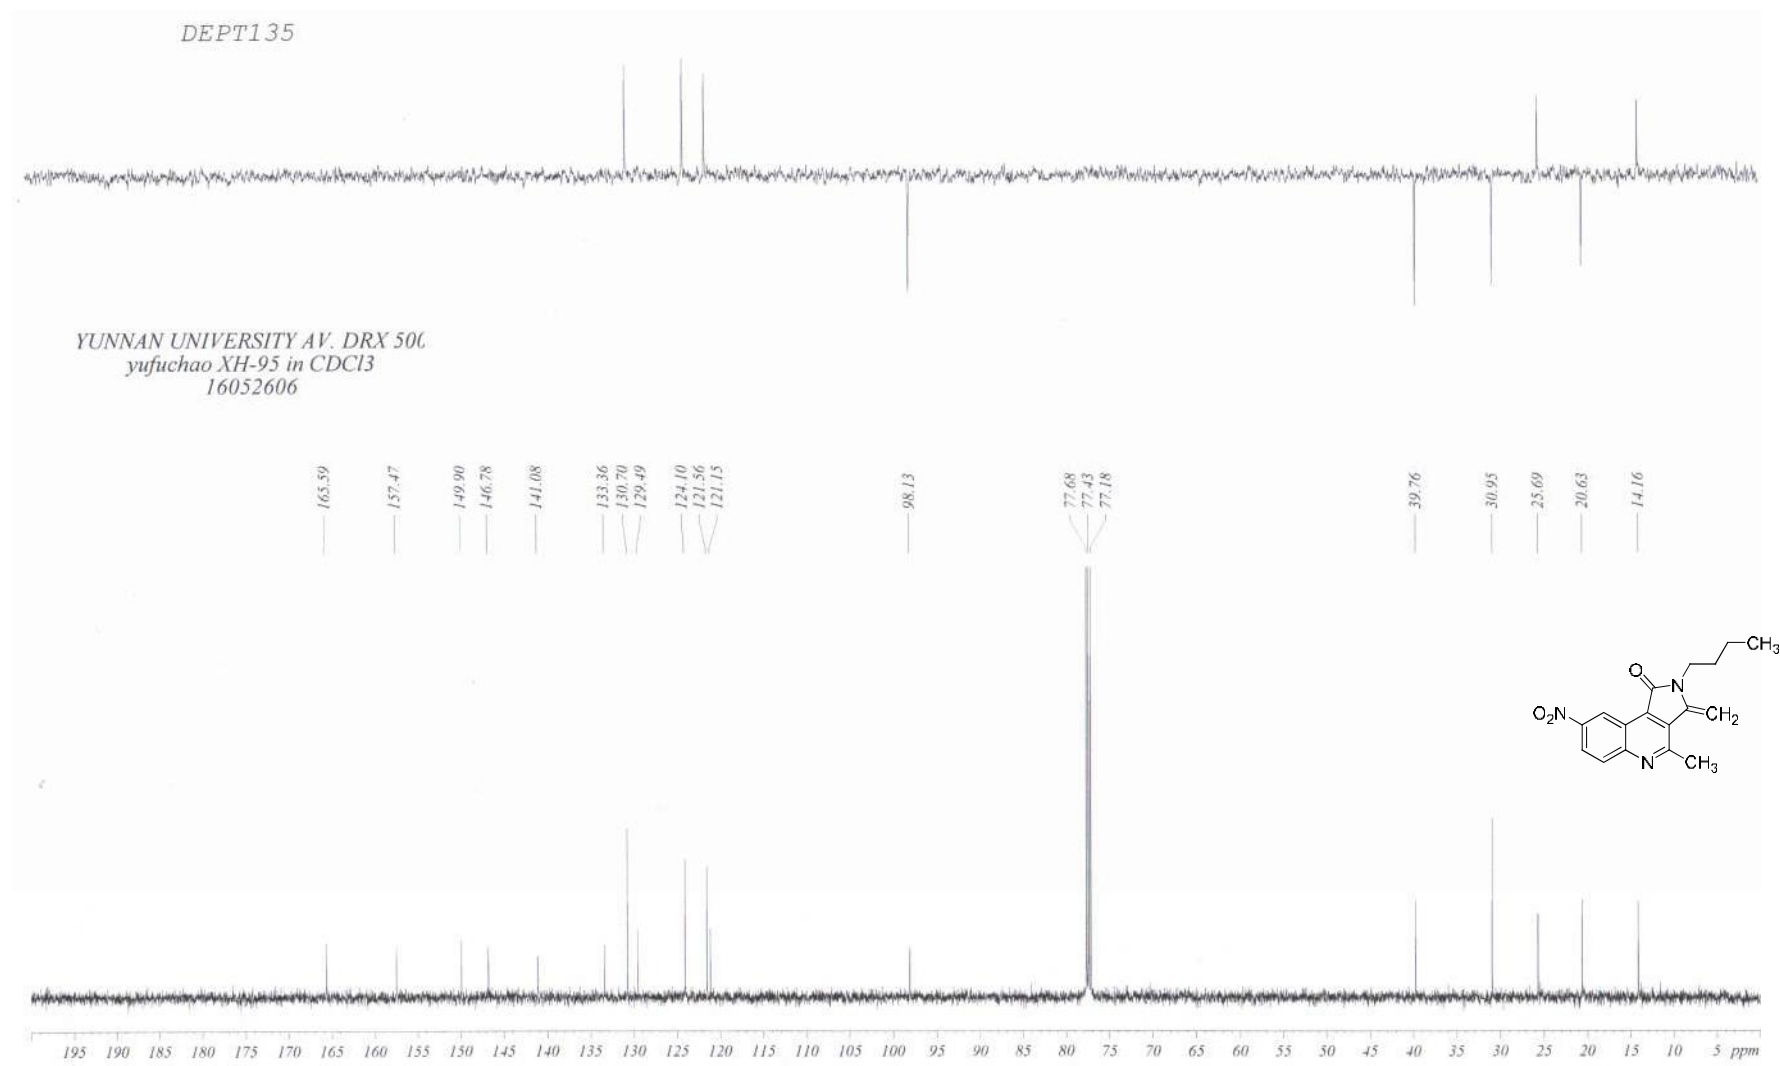

**Figure 64.** <sup>13</sup>C NMR (125 MHz, CDCl<sub>3</sub>) spectra of compound **6f'**

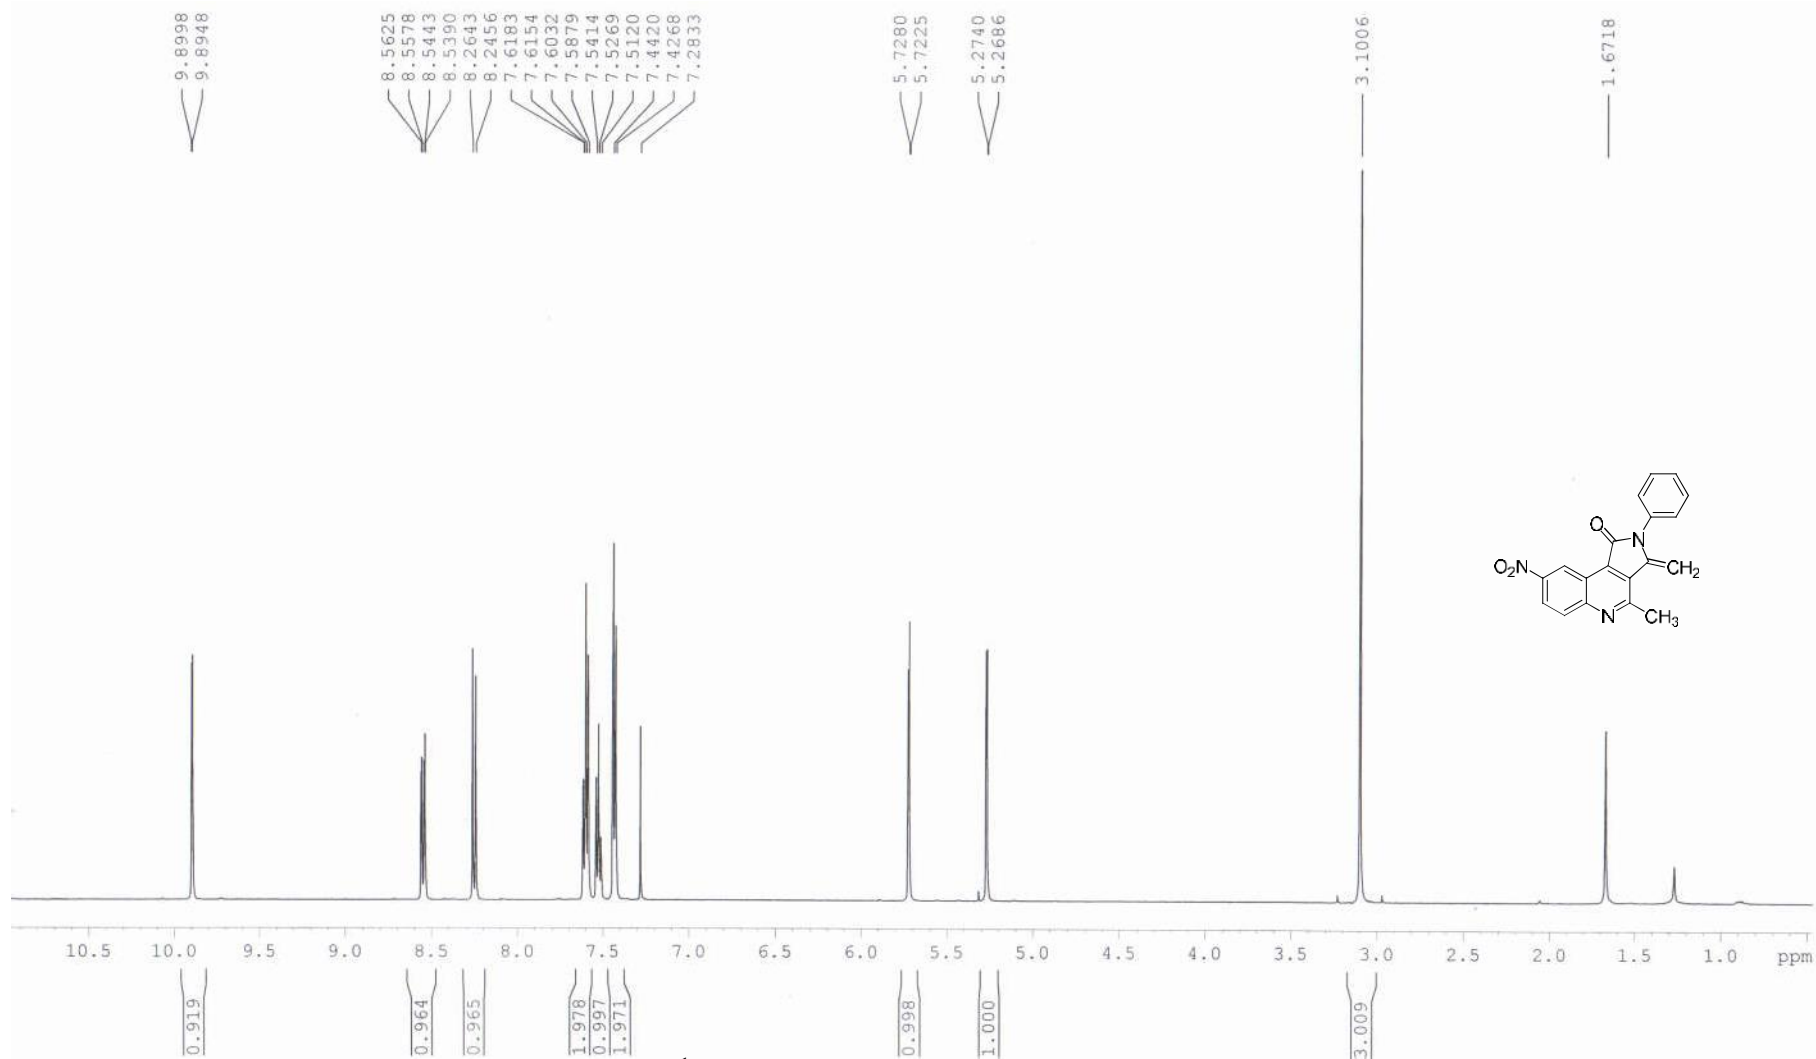

**Figure 65.** <sup>1</sup>H NMR (500 MHz, CDCl<sub>3</sub>) spectra of compound **6g'**

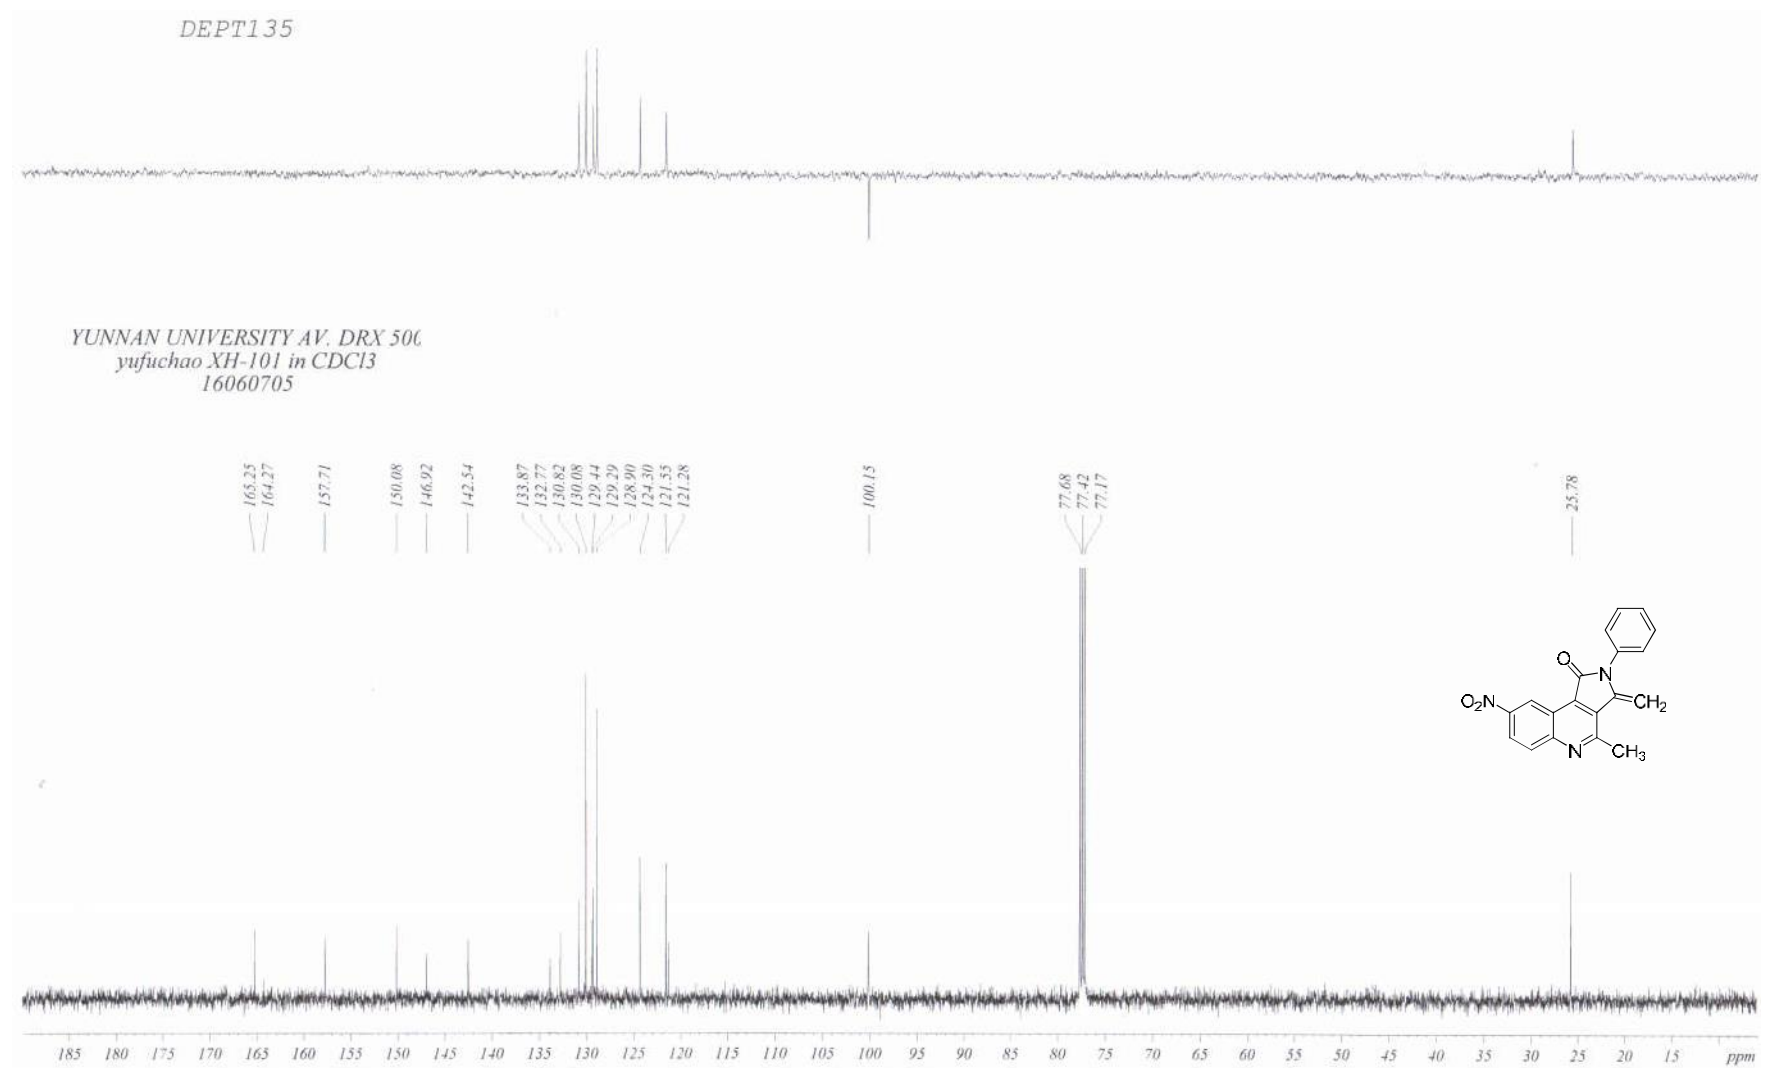

Figure 66. <sup>13</sup>C NMR (125 MHz, CDCl<sub>3</sub>) spectra of compound 6g'

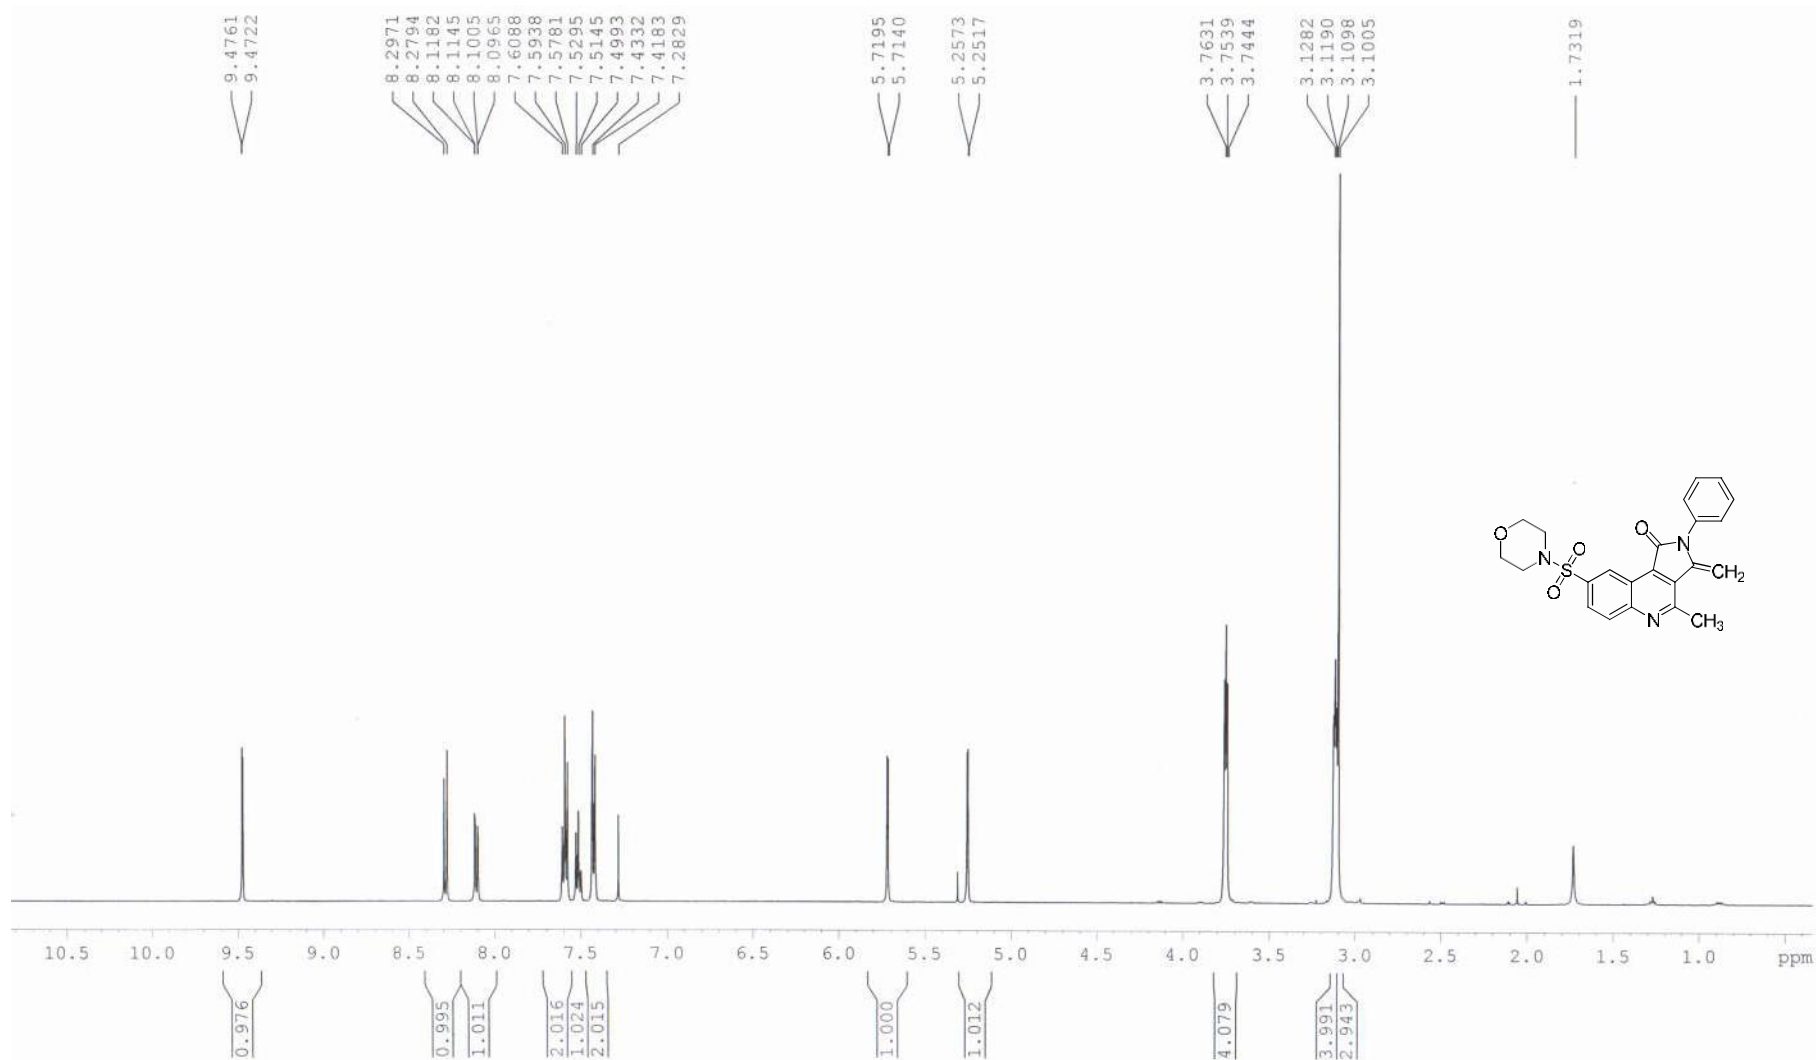

**Figure 67.**  $^1\text{H}$  NMR (500 MHz,  $\text{CDCl}_3$ ) spectra of compound **6h'**

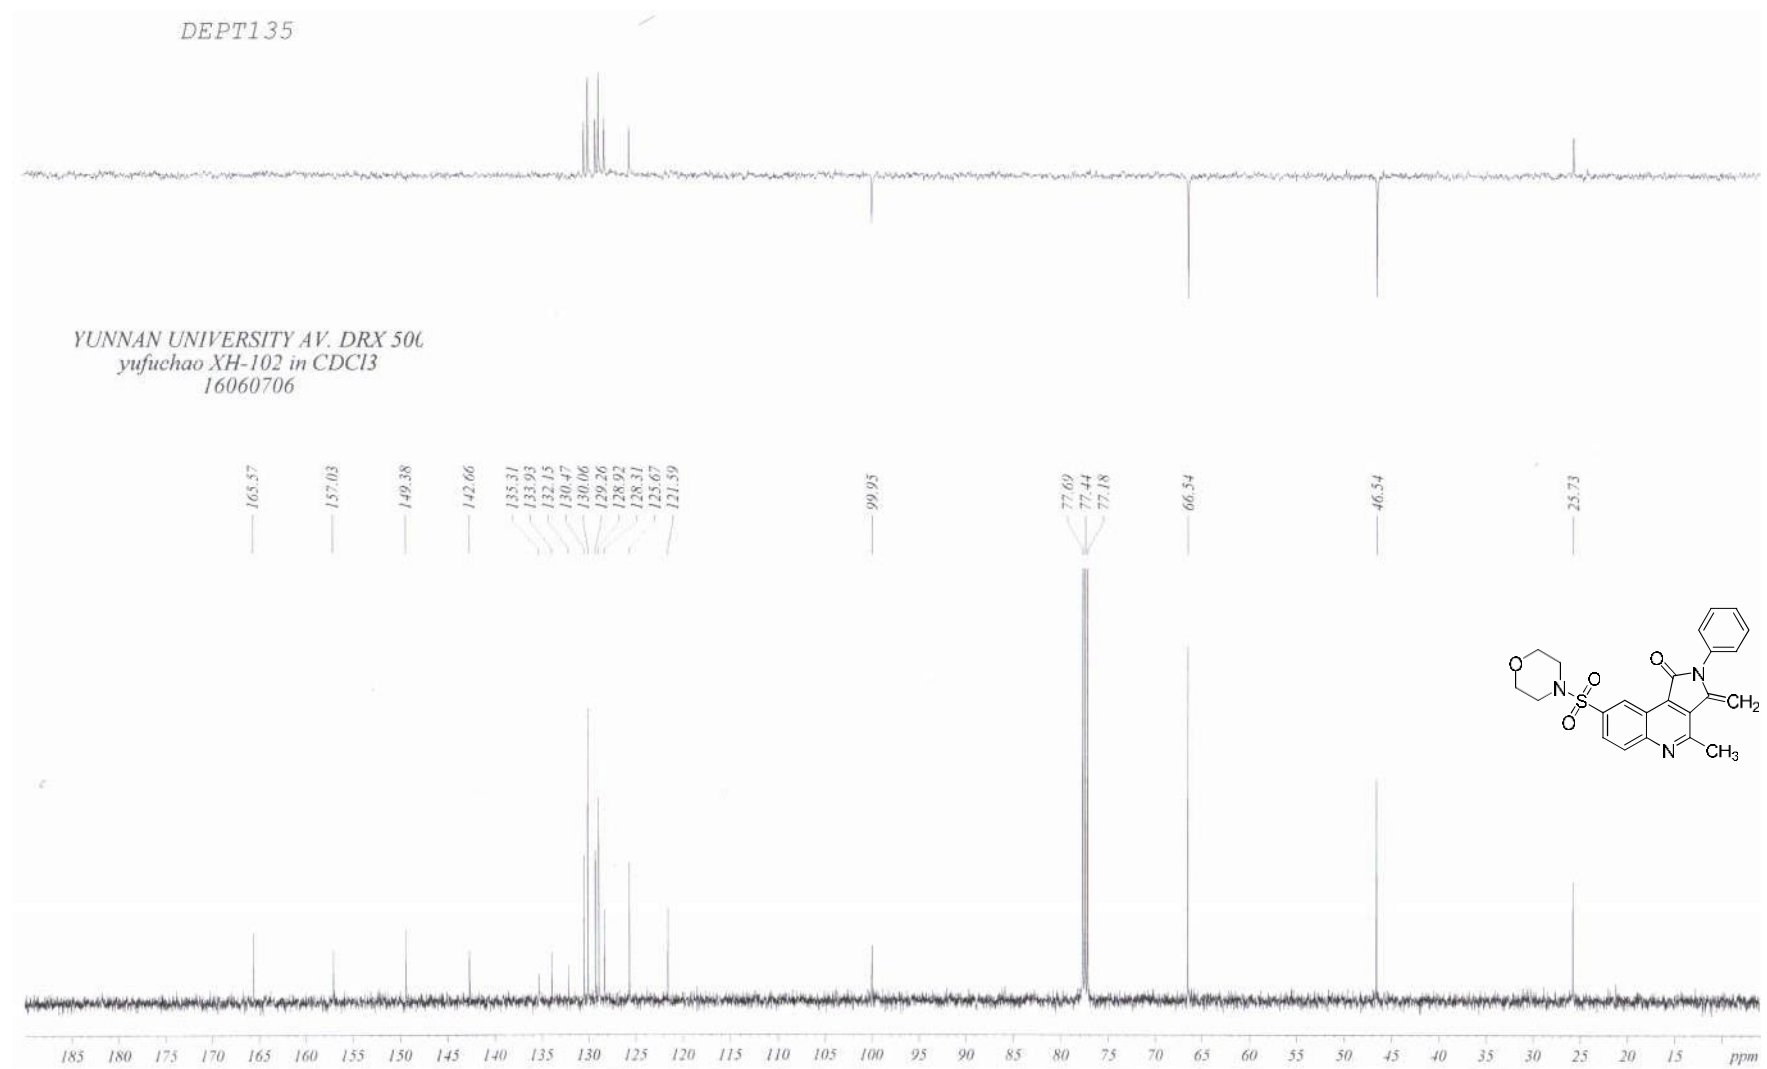

Figure 68. <sup>13</sup>C NMR (125 MHz, CDCl<sub>3</sub>) spectra of compound 6h'

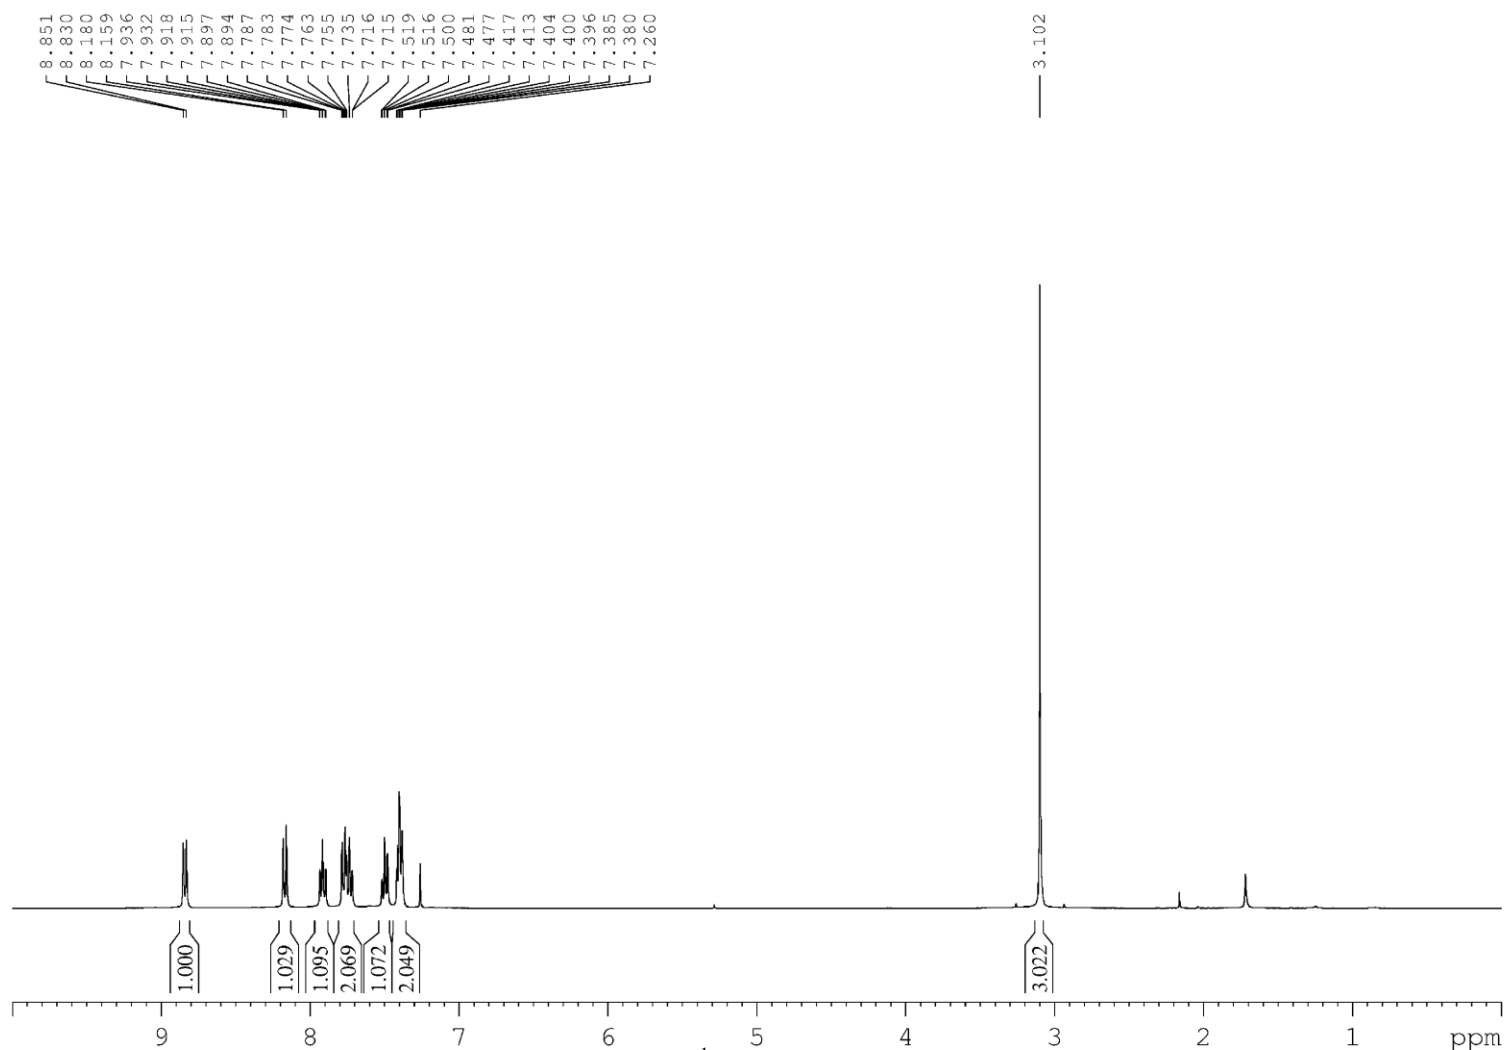

```

NAME      22012000180-5
EXPNO     420
PROCNO    1
Date_     20160108
Time      21.50
INSTRUM   spect
PROBHD    5 mm PABBO BB/
PULPROG   zg30
TD         65536
SOLVENT   CDCl3
NS         8
DS         0
SWH       8012.820 Hz
FIDRES    0.122266 Hz
AQ         4.0894966 sec
RG         78.11
DW         62.400 us
DE         6.50 us
TE         0.0 K
D1         1.00000000 sec
TD0        1

```

```

===== CHANNEL f1 =====
SF01      400.1522008 MH
NUC1       1H
P1         10.62 us
SI         65536
SF         400.1500101 MH
WDW        EM
SSB        0
LB         0.30 Hz
GB         0
PC         1.00

```

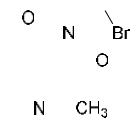

Figure 69. <sup>1</sup>H NMR (400 MHz, CDCl<sub>3</sub>) spectra of compound 7a

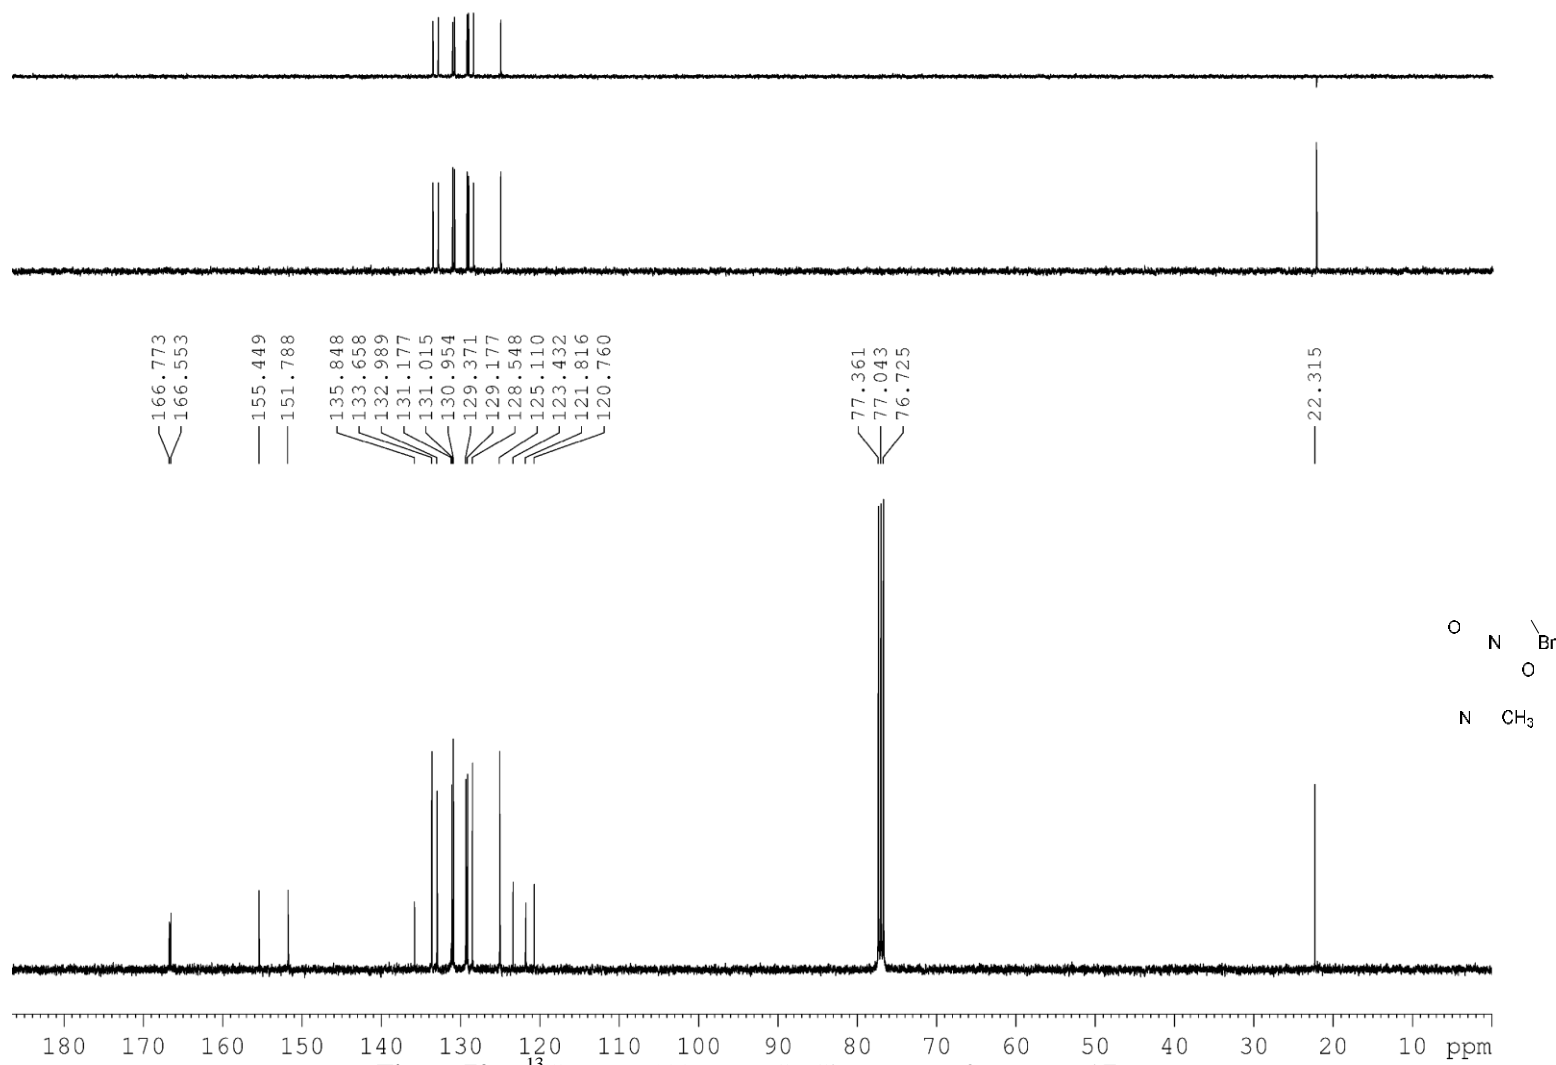

**Figure 70.**  $^{13}\text{C}$  NMR (100 MHz,  $\text{CDCl}_3$ ) spectra of compound **7a**



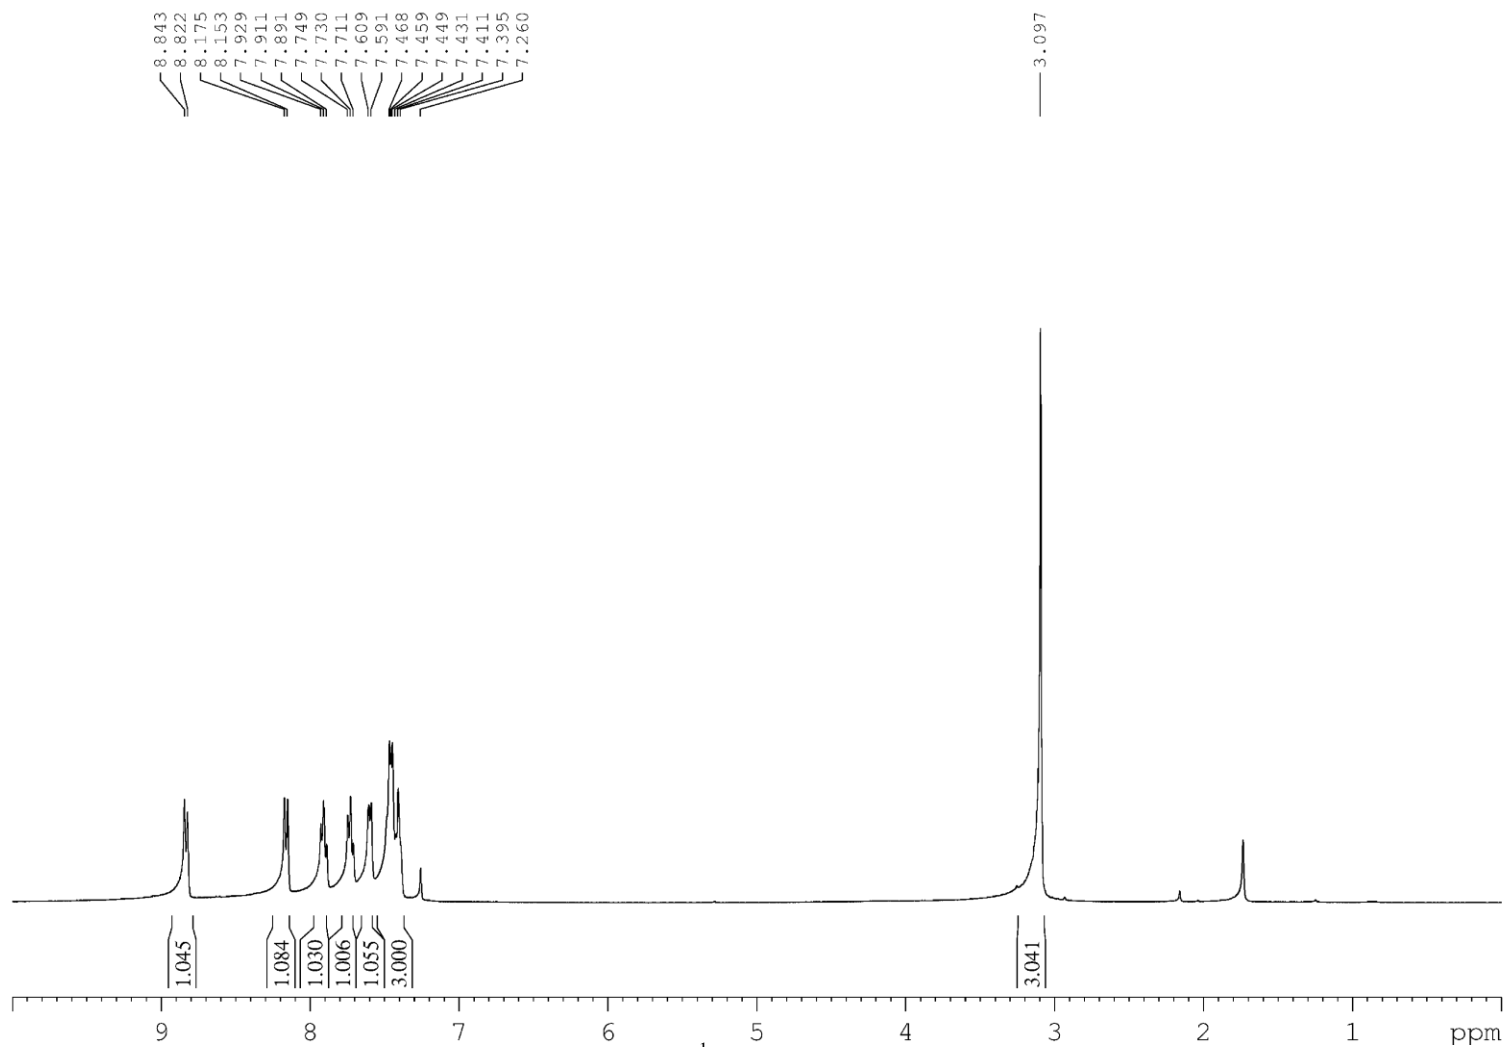

```

NAME      22012000180-5
EXPNO     440
PROCNO    1
Date_     20160109
Time      18.14
INSTRUM   spect
PROBHD    5 mm PABBO BB/
PULPROG   zg30
TD         65536
SOLVENT   CDCl3
NS         8
DS         0
SWH       8012.820 Hz
FIDRES    0.122266 Hz
AQ        4.0894966 sec
RG         78.11
DW         62.400 us
DE         6.50 us
TE         0.0 K
D1         1.00000000 sec
TD0        1

```

```

===== CHANNEL f1 =====
SF01     400.1522008 MH
NUC1      1H
P1        10.62 us
SI        65536
SF        400.1500098 MH
WDW       EM
SSB       0
LB        0.30 Hz
GB        0
PC        1.00

```

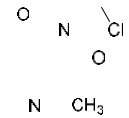

Figure 71. <sup>1</sup>H NMR (400 MHz, CDCl<sub>3</sub>) spectra of compound 7b

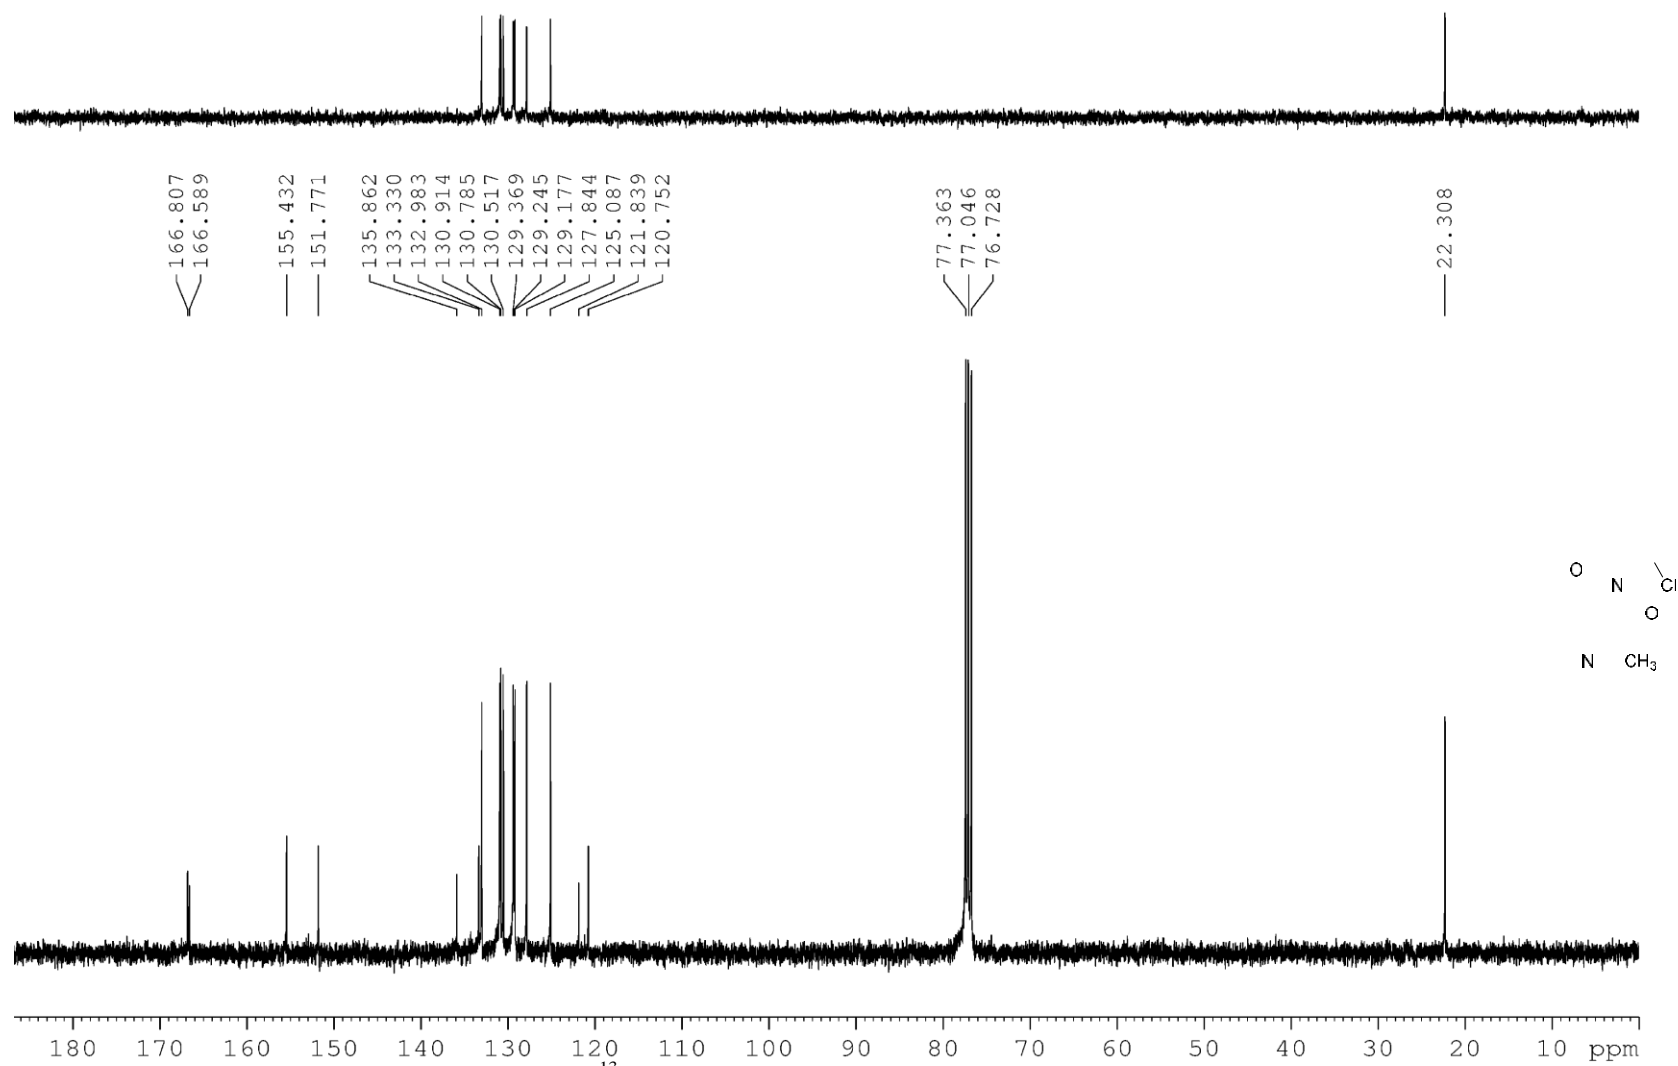

**Figure 72.**  $^{13}\text{C}$  NMR (100 MHz,  $\text{CDCl}_3$ ) spectra of compound **7b**

## 6. References and Notes

1. (a) Z. Duan, T. Li, X. J. Xuan, Y. J. Wu, *Chin. Chem. Lett.*, 2006, **17**, 1566; (b) M. M. Khodaei, A. R. Khosropour and C. Cardel, *J. Chin. Chem. Soc.*, 2008, **55**, 217.
2. C. E. Harris, W. Chrisman, S. A. Bickford, L. Y. Lee, A. E. Torreblanca and B. Singaram, *Tetrahedron Lett.*, 1997, **38**, 981.
3. CCDC **1438897** contain the supplementary crystallographic data for compound **6p**. These data can be obtained free of charge from The Cambridge Crystallographic Data Center via [www.ccdc.cam.ac.uk/data\\_request/cif](http://www.ccdc.cam.ac.uk/data_request/cif).
